# Supplementary material for: An algorithm to quantify intratumor heterogeneity based on alterations of gene expression profiles
Source: PubMed Central journal article supplement (PMC7486929; doi:10.1038/s42003-020-01230-7), 2020-09-11
Supplement: 42003_2020_1230_MOESM2_ESM.pdf [file 42003_2020_1230_MOESM2_ESM.pdf]

## **Description of Additional Supplementary Files**

File Name: Supplementary Data 1

Description: Correlations between DEPTH scores and drug sensitivity (IC50 values) of 265 compounds tested in cancer cell lines.

File Name: Supplementary Data 2

Description: 262 genes whose expression alteration has a strong positive correlation with DEPTH scores in at least 5 cancer types (FDR < 0.05,  $\rho > 0.5$ )

File Name: Supplementary Data 3

Description: Proteins with significantly higher (or lower) expression levels in high-DEPTH-score than in low-DEPTH-score tumors in at least 5 cancer types.

File Name: Supplementary Data 4

Description: Clone numbers inferred by DEPTH across cancer types.

File Name: Supplementary Data 5

Description: Correlations between ITH scores from seven different methods within individual cancer types.

File Name: Supplementary Data 6

Description: Association between ITH scores from seven different methods and tumor purity within individual cancer types.

File Name: Supplementary Data 7

Description: Correlations of the DEPTH scores calculated by the alternative method (without normal control) with genome instability, clinical features, immune signatures, and tumor purity.

File Name: Supplementary Data 8

Description: A summary of the gene expression profiling datasets used in this study.

File Name: Supplementary Data 9

Description: The marker genes of immune signatures, proliferation, and tumor stemness.
