# Supplementary material for: An algorithm to quantify intratumor heterogeneity based on alterations of gene expression profiles
Source: Commun Biol. 2020 Sep 11;3:505. doi: 10.1038/s42003-020-01230-7 (PMC7486929; doi:10.1038/s42003-020-01230-7)
Supplement: Supplementary file 3 — Supplementary Data [file 42003_2020_1230_MOESM3_ESM.xlsx]

## Sheet: Data 1
Supplementary Data 1. Correlations between DEPTH scores and drug sensitivity (IC50 values) of 265 compounds tested in cancer cell lines
Note: The compounds to which DEPTH scores have significant positive and negative correlations with drug sensitivity (IC50 values) are highlighted in red and in blue, respectively (Spearman's correlation test, FDR<0.05); ρ: correlation coefficient.
Drug	ρ	p value	FDR
Vorinostat	-0.370352	1.64716e-28	1.09125e-26
TL-2-105	-0.364907	7.41428e-30	1.96478e-27
AC220	-0.364792	9.61546e-30	1.27405e-27
I-BET	-0.362588	2.74568e-29	2.42535e-27
ABT-263	-0.349129	2.41367e-25	1.06604e-23
UNC0638	-0.339617	1.26085e-25	6.68253e-24
KIN001-102	-0.332933	8.68218e-25	3.28683e-23
Tubastatin A	-0.319741	9.06538e-23	3.00291e-21
Methotrexate	-0.315382	1.13884e-20	1.8862e-19
AR-42	-0.314052	7.59827e-22	2.01354e-20
XMD14-99	-0.311412	9.80428e-22	2.36194e-20
BMS-345541	-0.30762	3.03451e-21	6.18572e-20
VX-702	-0.30734	1.28975e-19	1.31455e-18
XMD13-2	-0.30549	6.45718e-21	1.14077e-19
NPK76-II-72-1	-0.303574	1.21656e-20	1.79104e-19
PHA-793887	-0.303469	1.13887e-20	1.7753e-19
KIN001-260	-0.303196	1.43238e-20	1.99779e-19
Masitinib	-0.30192	1.91172e-20	2.53303e-19
THZ-2-102-1	-0.300734	6.47682e-20	7.80163e-19
GSK1070916	-0.300103	1.14253e-19	1.21108e-18
WZ3105	-0.299953	3.29309e-20	4.15556e-19
TPCA-1	-0.297547	7.41644e-20	8.54503e-19
KIN001-236	-0.297135	8.37989e-20	9.2528e-19
TG101348	-0.289914	6.30291e-19	6.18619e-18
YM201636	-0.288828	9.40859e-19	8.90456e-18
KIN001-135	-0.287688	6.59858e-09	1.88024e-08
TL-1-85	-0.285521	2.41041e-18	2.20262e-17
PIK-93	-0.285307	2.56084e-18	2.26208e-17
NVP-BHG712	-0.281994	6.48441e-18	5.54313e-17
UNC1215	-0.281138	9.72016e-18	8.04951e-17
PXD101, Belinostat	-0.279534	3.59412e-17	2.8013e-16
CAY10603	-0.279193	1.73016e-17	1.38937e-16
MP470	-0.275135	5.00463e-17	3.78922e-16
MPS-1-IN-1	-0.273689	6.8222e-17	4.88617e-16
BX-912	-0.273162	6.98396e-17	4.87039e-16
TAK-715	-0.272815	6.81671e-17	5.01786e-16
VNLG/124	-0.27212	1.07972e-16	7.33657e-16
KIN001-244	-0.27139	1.21365e-16	8.04044e-16
SB52334	-0.27109	1.31458e-16	8.49665e-16
OSI-027	-0.270671	1.64971e-16	1.04089e-15
AT-7519	-0.26957	1.967e-16	1.21222e-15
CUDC-101	-0.268251	5.10539e-16	2.87857e-15
AV-951	-0.267491	3.27385e-16	1.97175e-15
GSK690693	-0.267215	3.51982e-16	2.07278e-15
JW-7-24-1	-0.266814	3.62751e-16	2.08976e-15
NG-25	-0.261518	1.53844e-15	8.4935e-15
T0901317	-0.261413	1.89129e-15	1.02284e-14
SNX-2112	-0.260401	2.72122e-15	1.44225e-14
QL-X-138	-0.250719	3.288e-14	1.70847e-13
Zibotentan, ZD4054	-0.248316	4.09946e-14	2.08915e-13
JQ1	-0.2475	4.99091e-14	2.49545e-13
BIX02189	-0.245639	7.79527e-14	3.82546e-13
5-Fluorouracil	-0.243339	1.62158e-13	7.81305e-13
OSI-930	-0.241327	2.0952e-13	9.9148e-13
QL-XI-92	-0.239104	3.41528e-13	1.56043e-12
CP466722	-0.23906	3.34828e-13	1.55666e-12
Nutlin-3a	-0.238599	2.83971e-12	1.25421e-11
ATRA	-0.236767	5.98098e-12	2.4765e-11
CX-5461	-0.235253	9.30824e-13	4.18082e-12
Imatinib	-0.233855	2.547e-06	5.86918e-06
Phenformin	-0.230596	3.13443e-12	1.36168e-11
PI-103	-0.230343	3.22364e-12	1.37784e-11
BMS-708163	-0.228482	3.79463e-12	1.59615e-11
FK866	-0.226946	8.19759e-12	3.3421e-11
Crizotinib	-0.226793	5.29891e-06	1.17018e-05
Vismodegib	-0.225114	4.96567e-11	1.87986e-10
Nilotinib	-0.224225	1.89554e-10	6.60944e-10
Ruxolitinib	-0.222352	1.44408e-11	5.71166e-11
Genentech Cpd 10	-0.220199	2.23024e-11	8.5654e-11
UNC0638	-0.21928	1.95452e-11	7.61687e-11
Lenalidomide	-0.213259	4.93385e-10	1.61416e-09
GSK2126458	-0.213217	9.84781e-11	3.67559e-10
KIN001-266	-0.213171	1.0426e-10	3.78479e-10
SB-715992	-0.21303	1.02328e-10	3.76626e-10
PAC-1	-0.212283	4.9159e-10	1.62839e-09
KIN001-270	-0.211492	1.46879e-10	5.25986e-10
SGC0946	-0.209391	2.51978e-10	8.67197e-10
XMD15-27	-0.207851	2.92377e-10	9.93333e-10
GSK429286A	-0.207326	3.1749e-10	1.065e-09
SB590885	-0.207053	2.42094e-09	7.45987e-09
Temozolomide	-0.205958	4.98019e-10	1.60945e-09
FR-180204	-0.20452	5.91601e-10	1.86636e-09
SB-505124	-0.203489	5.46212e-10	1.74393e-09
FMK	-0.202528	1.2304e-08	3.39642e-08
AZD8055	-0.202105	4.52197e-09	1.30252e-08
STF-62247	-0.200957	1.23452e-09	3.84881e-09
EX-527	-0.19675	2.805e-09	8.54396e-09
AICAR	-0.195241	1.63295e-08	4.41564e-08
PHA-665752	-0.195201	9.23537e-05	0.000184013
ABT-869	-0.194495	3.87244e-09	1.16613e-08
GW-2580	-0.194339	3.98698e-09	1.18713e-08
Y-39983	-0.193951	4.45788e-09	1.29818e-08
ZSTK474	-0.193777	4.42692e-09	1.30348e-08
Tamoxifen	-0.189174	8.39503e-09	2.36668e-08
MS-275	-0.188402	0.000178899	0.000338631
Bicalutamide	-0.187723	3.31713e-08	8.70337e-08
CAL-101	-0.185049	2.12539e-08	5.68917e-08
QL-XII-47	-0.184693	2.38888e-08	6.33052e-08
SL 0101-1	-0.183099	1.27031e-07	3.23685e-07
LAQ824	-0.180026	1.16005e-07	2.98459e-07
PD-173074	-0.175064	3.57112e-07	8.68209e-07
NSC-207895	-0.173191	1.85329e-07	4.67736e-07
AS605240	-0.172845	1.87179e-07	4.67948e-07
CEP-701	-0.172295	5.74206e-07	1.38332e-06
CH5424802	-0.170396	2.75362e-07	6.75656e-07
Olaparib	-0.165486	1.5695e-06	3.64841e-06
EHT 1864	-0.16423	6.4992e-07	1.55161e-06
Cyclopamine	-0.156304	0.00207089	0.00373323
VX-11e	-0.155962	2.58714e-06	5.91027e-06
THZ-2-49	-0.155863	2.72839e-06	6.17968e-06
NSC-87877	-0.152339	7.30709e-06	1.5872e-05
Sunitinib	-0.151245	0.00281935	0.00494787
LY317615	-0.150026	6.10727e-06	1.33754e-05
Parthenolide	-0.149643	0.00297746	0.00519096
Axitinib	-0.14897	1.63716e-05	3.49877e-05
ABT-888	-0.147573	1.90069e-05	4.02946e-05
XL-184	-0.145795	1.12693e-05	2.42794e-05
Pyrimethamine	-0.142241	0.00483275	0.00826244
Roscovitine	-0.140735	0.00554673	0.00924455
CP724714	-0.139762	2.527e-05	5.31472e-05
Bicalutamide	-0.13924	4.0099e-05	8.30176e-05
Salubrinal	-0.136607	0.00704312	0.0114505
XL-880	-0.135156	4.88808e-05	0.000100414
XMD11-85h	-0.133711	0.00314304	0.00544382
PFI-1	-0.131762	6.33846e-05	0.000129207
QL-XII-61	-0.130105	0.0050015	0.00849614
KU-55933	-0.129848	0.000169789	0.000323698
S-Trityl-L-cysteine	-0.129242	0.0109294	0.0174475
BMS-536924	-0.129128	9.28887e-05	0.000183698
PLX4720	-0.129051	0.000186282	0.000350104
PF-4708671	-0.125613	0.000169063	0.000324651
GNF-2	-0.124733	0.014197	0.0221306
BAY 61-3606	-0.122455	0.000342951	0.000640014
HG-5-88-01	-0.11838	0.00906751	0.0146518
EKB-569	-0.118353	0.000370624	0.000686821
AZD7762	-0.113864	0.00100148	0.00183029
CCT007093	-0.113833	0.000597433	0.00109944
PLX4720 (rescreen)	-0.0905626	0.00646468	0.0106406
JQ12	-0.0860256	0.0117569	0.0185452
NU-7441	-0.0841234	0.0152181	0.0234465
IPA-3	-0.0840244	0.0140974	0.0221053
Dabrafenib	-0.0811103	0.0174213	0.0263808
ZM-447439	-0.0773556	0.0300143	0.0441878
KIN001-055	-0.0752405	0.0239907	0.0357165
Gemcitabine	0.0746962	0.0295325	0.0437214
JNJ-26854165	0.0793398	0.0171587	0.0262835
Afatinib	0.0825794	0.0171981	0.0261926
Embelin	0.083469	0.0146323	0.0226757
piperlongumine	0.0861521	0.00920249	0.0147798
Tipifarnib	0.0867798	0.0112742	0.0178902
XAV 939	0.0897401	0.00693614	0.0113461
TW 37	0.091267	0.00603226	0.00999093
CHIR-99021	0.0925518	0.00545836	0.00915484
HG-6-64-1	0.0949534	0.00534939	0.00902922
BMN-673	0.0975688	0.00338974	0.005833
AS601245	0.103194	0.00257834	0.00455506
Afatinib (rescreen)	0.107364	0.00125627	0.00228022
A-770041	0.115412	0.0228119	0.0341534
JW-7-52-1	0.122039	0.0182228	0.0274378
AUY922	0.129444	0.000161235	0.000311878
Cytarabine	0.132421	0.00013141	0.000257953
FH535	0.134837	7.95678e-05	0.000159738
Cetuximab	0.135649	6.52398e-05	0.000131974
Bleomycin	0.142486	3.18998e-05	6.65627e-05
AZD6244	0.151095	4.86729e-06	1.08389e-05
Bortezomib	0.153457	0.00234427	0.00416934
Lapatinib	0.154995	0.00223005	0.00399299
Midostaurin	0.155576	4.34042e-06	9.74756e-06
Thapsigargin	0.169074	8.28795e-07	1.94363e-06
RDEA119	0.171666	6.93649e-07	1.64122e-06
PD-0325901	0.180008	1.87418e-07	4.64165e-07
RDEA119 (rescreen)	0.18134	7.7285e-08	2.0079e-07
WH-4-023	0.191753	0.000150432	0.00029312
Epothilone B	0.195148	8.92987e-09	2.49096e-08
Elesclomol	0.219367	1.59427e-10	5.63307e-10
Trametinib	0.225774	1.17373e-11	4.71269e-11
Dasatinib	0.284499	1.33167e-08	3.63806e-08
Bleomycin (50 uM)	0.302353	6.36098e-21	1.20404e-19
17-AAG	0.321655	1.41435e-21	3.12336e-20
Docetaxel	0.32817	2.29031e-22	6.74368e-21
QS11	-0.0675199	0.0485511	0.0691722
CMK	-0.0662856	0.192611	0.235216
MK-2206	-0.0643978	0.0668028	0.0922018
BMS-708163	-0.0637152	0.0546867	0.077085
Rapamycin	-0.0839796	0.114734	0.149042
Z-LLNle-CHO	-0.0952421	0.0608944	0.0853811
XMD8-85	-0.0939021	0.0649828	0.0906339
Sorafenib	-0.0624639	0.216622	0.260931
BX-795	-0.0607211	0.0794977	0.109155
VX-680	-0.086905	0.0894285	0.121531
XMD8-92	-0.0586824	0.196082	0.238357
SB 216763	-0.0586189	0.112807	0.147989
OSI-906	-0.0567464	0.0982646	0.131516
DMOG	-0.0552853	0.105197	0.139386
GDC0941	-0.0542796	0.118821	0.153598
AP-24534	-0.0539208	0.113449	0.148099
GSK269962A	-0.0536338	0.105332	0.13887
ZG-10	-0.0522216	0.250529	0.293762
IOX2	-0.0504338	0.127604	0.162572
AZ628	-0.0416275	0.41053	0.462938
GSK-1904529A	-0.0403654	0.238652	0.284878
LFM-A13	-0.0396439	0.247434	0.292724
rTRAIL	-0.039364	0.236802	0.283948
Gefitinib	-0.0388465	0.263902	0.30808
Shikonin	-0.0340467	0.318628	0.368718
JQ1	-0.0325471	0.339578	0.391253
HG-5-113-01	-0.0285261	0.530412	0.571379
Camptothecin	-0.019547	0.573416	0.615204
CGP-082996	-0.019126	0.707247	0.743732
AMG-706	-0.0139416	0.687479	0.731655
BIRB 0796	-0.0132899	0.703083	0.742299
CHIR-99021	-0.0119727	0.725727	0.760148
JNK-9L	-0.0110949	0.744825	0.777081
GW 441756	-0.0103467	0.765975	0.792904
GSK269962A	-0.0102795	0.83923	0.861999
BMS-509744	-0.00636873	0.900359	0.917673
AG-014699	-0.00430836	0.897017	0.917797
GW843682X	-2.17114e-05	0.999659	0.999659
Mitomycin C	0.00189348	0.955911	0.963181
681640	0.00191464	0.958364	0.961994
JNK Inhibitor VIII	0.00228268	0.94755	0.9584
Bryostatin 1	0.00318002	0.92624	0.940435
Vinblastine	0.00736832	0.831837	0.857731
Bosutinib	0.0103379	0.765621	0.795645
Etoposide	0.0133242	0.695724	0.737467
OSU-03012	0.0165427	0.62947	0.672619
(5Z)-7-Oxozeaenol	0.0228974	0.492437	0.53702
BMS-754807	0.0244373	0.476761	0.522073
Obatoclax Mesylate	0.0259961	0.4499	0.496765
SN-38	0.0269436	0.415361	0.464433
Cisplatin	0.0274835	0.428255	0.474843
Temsirolimus	0.027861	0.42531	0.473559
Pazopanib	0.0319687	0.351619	0.403372
CGP-60474	0.0337764	0.5071	0.548496
A-443654	0.0348703	0.493434	0.535901
MG-132	0.03696	0.466731	0.513211
NVP-BEZ235	0.0382228	0.271942	0.316073
FTI-277	0.0392735	0.249114	0.293401
PD-0332991	0.0406698	0.247318	0.293898
BI-2536	0.0416089	0.414358	0.465275
NVP-TAE684	0.0420601	0.404479	0.458064
CCT018159	0.0424451	0.20791	0.25158
WZ-1-84	0.0436859	0.390812	0.444486
Erlotinib	0.0481262	0.361229	0.412611
Vinorelbine	0.0486235	0.153289	0.191611
Bexarotene	0.0490135	0.155323	0.193242
YM155	0.0492647	0.146765	0.184325
YK 4-279	0.0497343	0.164706	0.203009
AKT inhibitor VIII	0.0499878	0.142999	0.180451
Olaparib (rescreen)	0.0500426	0.135544	0.171863
GSK-650394	0.0526942	0.125879	0.161149
AZD6482	0.0563944	0.0936136	0.126569
AZD6244	0.0577635	0.100633	0.134008
CI-1040	0.0581245	0.0956442	0.128658
AZD6482	0.0588616	0.0846826	0.115675
Doxorubicin	0.0629582	0.0659187	0.091458
QL-VIII-58	0.0634189	0.161877	0.200455
GDC0941 (rescreen)	0.0695027	0.0399479	0.0575337
TGX221	0.104391	0.0393431	0.0569723
BMS-536924	0.070404	0.165797	0.203409
AZD-0530	0.101289	0.0439634	0.0629746
Paclitaxel	0.0779672	0.124749	0.160478
PF-562271	0.0723676	0.0352232	0.0512865
RO-3306	0.0732022	0.0344344	0.0504151
MLN4924	0.0745111	0.0500821	0.070972

## Sheet: Data 2
Supplementary Data 2. 262 genes whose expression alteration has a strong positive correlation with DEPTH scores in at least 5 cancer types (FDR < 0.05, ρ > 0.5)
Note: “1” indicates that the gene has a strong positive expression alteration correlation with DEPTH scores and "0" indicates otherwise;
"Total" indicates the number of cancer types in which the gene has a strong positive expression alteration correlation with DEPTH scores.
Gene symbol	ACC	BLCA	BRCA	CESC	CHOL	COAD	ESCA	GBM	HNSC	KICH	KIRC	KIRP	LAML	LIHC	LUAD	LUSC	OV	PAAD	PRAD	READ	SKCM	STAD	TGCT	THCA	UCEC	Total
ADH1B	1	1	1	0	1	1	1	0	1	1	1	1	0	0	1	1	0	0	0	1	0	1	0	0	1	15
ABCA8	0	1	1	1	0	1	1	0	1	0	0	0	0	0	1	1	1	0	0	1	0	1	1	0	1	13
LMOD1	0	1	1	1	0	0	1	0	0	1	0	0	0	0	0	1	1	0	1	0	0	1	1	1	1	12
TCF21	0	1	0	1	0	1	1	0	0	0	1	1	0	1	1	1	1	0	0	1	0	1	0	0	0	12
MYOCD	0	1	1	1	0	1	1	0	0	0	0	0	0	0	1	1	1	0	1	1	0	1	0	0	1	12
C1QTNF7	0	1	1	1	0	1	1	0	0	1	1	0	0	0	1	1	1	0	0	0	0	1	0	0	1	12
C7	0	1	1	1	0	0	1	0	0	0	1	0	0	1	1	1	1	0	0	0	0	1	0	0	1	11
MMRN1	0	1	1	1	0	1	1	0	1	0	0	0	0	0	1	1	0	0	0	1	0	1	0	0	1	11
MYH11	0	1	1	1	0	0	1	0	0	1	0	0	0	0	0	0	1	0	1	0	0	1	1	0	1	10
PGM5	0	1	1	1	0	0	1	0	1	0	0	0	0	1	1	1	0	0	1	0	0	1	0	0	0	10
SYNPO2	0	1	1	1	0	0	1	0	0	1	0	0	0	1	0	0	1	0	1	0	0	1	0	0	1	10
TEK	0	1	1	1	0	1	1	0	0	1	0	0	0	1	1	1	0	0	0	0	0	0	0	0	1	10
TNXB	0	1	1	0	0	0	1	0	0	1	0	0	0	0	1	1	1	0	0	0	0	1	1	0	1	10
CCL14	0	1	1	1	0	0	1	0	1	0	0	0	0	1	1	1	0	0	0	0	0	1	0	0	1	10
JPH4	0	0	1	1	0	0	0	1	0	1	1	0	0	0	1	0	1	0	1	0	0	1	0	0	1	10
INMT	1	1	1	0	0	0	1	0	0	0	0	0	0	1	1	1	0	0	1	0	0	0	1	0	0	9
FAM107A	0	1	1	0	0	1	1	0	0	1	0	0	0	0	1	1	0	0	1	0	0	1	0	0	0	9
FAT4	0	1	1	1	0	1	1	0	0	0	0	0	0	0	1	1	1	0	1	0	0	0	0	0	0	9
IL33	0	1	1	0	0	0	1	0	0	0	0	0	0	1	1	1	0	0	1	0	0	1	0	0	1	9
JAM2	0	1	1	1	0	0	1	0	0	0	0	0	0	0	1	1	0	0	0	0	0	1	1	0	1	9
MRVI1	0	1	1	1	0	0	1	0	0	0	0	0	1	0	0	0	1	0	1	0	0	1	0	0	1	9
PTGDS	0	1	1	1	0	1	0	0	0	1	0	0	0	0	1	1	0	0	1	0	0	1	0	0	0	9
SDPR	0	1	1	0	0	1	1	0	0	0	0	0	0	0	1	0	1	0	1	0	0	1	0	1	0	9
OGN	0	1	1	1	0	0	1	0	0	0	0	0	0	0	1	1	1	0	1	0	0	0	0	0	1	9
RSPO1	0	1	1	1	0	0	1	0	0	0	0	0	0	0	1	0	0	0	0	1	1	1	0	0	1	9
PEG3	0	1	0	1	0	0	1	1	0	0	0	0	0	0	0	1	1	0	0	0	0	1	0	1	1	9
TMEM100	0	1	1	1	0	1	1	0	0	0	0	0	0	1	1	1	0	0	0	0	0	1	0	0	0	9
DARC	0	1	1	0	0	1	1	0	1	0	0	0	0	0	1	1	0	0	0	0	0	1	0	0	1	9
SCN7A	0	1	1	1	0	0	1	0	0	0	0	0	0	0	1	1	1	0	1	0	0	1	0	0	0	9
SELP	0	1	1	1	0	1	1	0	0	0	0	0	0	1	1	1	0	0	0	0	0	0	0	0	1	9
ANGPTL1	0	1	1	1	0	0	1	0	0	0	0	0	0	0	0	1	0	1	1	0	0	1	0	1	0	9
ADAMTS8	0	1	1	0	0	1	1	1	0	1	0	0	0	0	1	1	0	0	1	0	0	0	0	0	0	9
RSPO2	0	1	0	0	0	1	1	1	0	0	0	0	0	0	1	1	0	0	1	1	0	1	0	0	0	9
ARHGAP20	0	1	1	1	0	0	0	0	0	0	0	0	0	0	1	1	0	0	1	0	0	1	1	0	1	9
CDO1	0	1	1	1	1	0	0	0	0	0	0	0	0	0	1	0	1	1	0	0	0	1	0	0	1	9
P2RY14	0	1	0	1	0	1	1	0	0	1	0	0	0	0	1	1	0	0	0	1	0	1	0	0	0	9
ITGA8	0	1	0	1	0	1	1	0	0	0	0	0	0	0	1	1	1	0	0	1	0	1	0	0	0	9
CLEC10A	0	1	1	0	0	1	0	0	0	1	0	0	1	0	1	1	0	0	0	1	0	1	0	0	0	9
FHL5	0	1	1	1	0	1	1	0	0	0	0	0	0	0	1	1	0	0	0	1	0	0	1	0	0	9
ABI3BP	0	1	1	1	0	0	1	0	0	0	0	0	0	0	1	1	0	0	0	0	0	1	0	0	1	8
AOC3	0	1	1	1	0	0	1	0	0	0	0	0	0	0	1	1	0	0	1	0	0	0	0	0	1	8
CLEC3B	0	1	0	1	0	1	1	0	0	0	0	0	0	1	1	1	0	0	0	0	0	1	0	0	0	8
CNRIP1	0	1	1	1	0	0	0	0	0	1	0	0	0	0	0	1	1	0	0	0	0	1	0	0	1	8
EMCN	0	1	1	1	0	0	1	0	0	1	0	0	0	0	1	1	0	0	0	0	0	0	0	0	1	8
FBLN5	0	1	1	1	0	0	0	0	0	0	1	1	0	1	1	1	0	0	0	0	0	0	0	0	0	8
FHL1	0	1	1	1	0	1	0	0	0	0	0	0	0	0	1	0	0	0	1	0	0	1	0	1	0	8
LRRN4CL	0	1	1	1	0	1	1	0	0	0	0	0	0	0	0	0	1	0	0	0	0	1	0	0	1	8
MFAP4	0	1	1	1	0	1	1	0	0	0	0	0	0	0	1	1	0	0	0	0	0	1	0	0	0	8
PPP1R12B	0	1	1	1	0	0	1	0	0	0	0	0	0	0	0	0	1	0	1	0	0	0	0	1	1	8
RASGRP2	0	1	0	1	0	1	1	0	0	1	0	0	0	0	1	1	0	0	0	0	0	1	0	0	0	8
RCAN2	0	1	1	1	0	1	1	0	0	0	0	0	0	0	0	1	0	0	0	0	0	1	0	1	0	8
SPARCL1	0	1	1	1	0	0	1	0	0	0	0	0	0	0	1	0	1	0	0	0	0	1	0	0	1	8
SYNE1	0	1	1	1	0	0	1	0	0	0	0	0	0	0	1	1	1	0	0	0	0	0	0	1	0	8
TNS1	0	1	1	1	0	0	1	0	0	0	0	0	0	0	1	1	0	0	1	0	0	0	0	1	0	8
GSTM5	0	1	1	1	0	0	0	0	0	0	0	0	0	0	1	0	1	0	1	0	0	1	0	0	1	8
HPSE2	0	1	1	1	0	1	1	1	0	0	0	0	0	0	1	0	0	0	0	1	0	0	0	0	0	8
ATP1A2	0	1	1	1	0	0	1	0	0	0	0	0	0	0	1	1	0	0	1	0	0	1	0	0	0	8
AFF3	0	1	0	1	0	1	1	0	0	0	0	0	0	0	1	1	0	0	0	1	0	1	0	0	0	8
LDB2	0	1	1	1	0	0	1	0	0	0	0	0	0	1	1	1	0	0	0	0	0	0	0	0	1	8
PGR	0	1	0	1	0	0	1	1	0	0	0	0	0	0	1	1	0	0	1	0	0	1	0	0	0	8
CHRDL1	0	1	1	1	0	0	1	0	0	0	0	0	0	0	1	1	0	0	1	0	0	1	0	0	0	8
HLF	0	1	1	0	0	0	0	1	0	0	0	0	0	0	1	0	1	1	1	0	0	0	0	1	0	8
FCER1A	0	1	1	0	0	1	0	0	0	1	0	0	0	0	1	0	0	0	1	0	1	1	0	0	0	8
KIT	0	0	1	1	0	0	1	0	0	0	0	0	0	0	0	1	1	0	1	0	0	1	0	1	0	8
PLCXD3	0	0	1	1	0	0	1	1	0	0	0	0	0	0	1	1	1	0	0	0	0	1	0	0	0	8
A2M	0	1	1	1	0	1	0	0	0	0	0	0	0	0	1	1	0	0	0	0	0	0	0	0	1	7
AQP1	0	1	1	1	0	0	0	0	0	0	0	0	0	0	1	1	0	1	0	0	0	0	0	0	1	7
C7orf58	0	1	1	0	0	1	1	0	0	0	0	0	0	0	0	0	0	0	1	0	0	1	0	0	1	7
CELF2	0	1	1	0	0	0	1	0	0	0	0	0	0	0	1	1	0	0	1	0	0	1	0	0	0	7
GPRASP1	0	1	1	1	0	0	1	0	0	0	0	0	0	0	0	0	1	0	1	0	0	0	0	0	1	7
ITIH5	0	1	1	0	0	1	1	0	0	0	0	0	0	0	1	0	0	0	1	0	0	1	0	0	0	7
ITM2A	0	1	1	0	0	0	1	0	0	0	0	0	0	0	1	1	0	0	0	0	0	1	0	1	0	7
LAMA2	0	1	1	1	0	0	1	0	0	0	0	0	0	0	1	1	1	0	0	0	0	0	0	0	0	7
LIMS2	0	1	1	1	0	0	1	0	0	1	0	0	0	1	0	0	0	0	1	0	0	0	0	0	0	7
MRGPRF	0	1	1	1	0	0	0	0	0	0	0	0	0	0	0	0	1	0	1	0	1	0	0	0	1	7
MYCT1	0	1	1	1	0	0	0	0	0	0	0	0	0	1	1	1	0	0	0	0	0	0	0	0	1	7
PODN	0	1	1	1	0	1	1	0	0	1	0	0	0	0	0	1	0	0	0	0	0	0	0	0	0	7
PTGIS	0	1	1	1	0	0	1	0	0	0	0	0	0	0	0	1	1	0	1	0	0	0	0	0	0	7
SHE	0	1	1	1	0	0	1	0	0	0	0	0	0	0	1	1	1	0	0	0	0	0	0	0	0	7
STARD8	0	1	1	1	0	0	1	0	0	0	0	0	0	0	1	1	0	0	1	0	0	0	0	0	0	7
TPSAB1	0	1	0	0	0	1	0	0	0	0	0	0	0	0	1	1	0	0	0	1	1	1	0	0	0	7
ZCCHC24	0	1	1	1	0	0	0	0	0	1	0	0	0	0	1	1	1	0	0	0	0	0	0	0	0	7
FOXF1	0	1	0	0	0	1	1	0	0	0	0	0	0	0	1	0	0	0	1	1	0	1	0	0	0	7
BHMT2	0	1	1	1	0	0	1	0	0	1	0	0	0	0	0	0	0	0	1	0	0	1	0	0	0	7
CPA3	0	1	0	0	0	1	0	0	0	0	0	0	0	0	1	1	0	0	0	1	1	1	0	0	0	7
C2orf40	0	1	1	1	0	0	1	0	0	0	1	0	0	0	1	0	0	0	0	0	0	1	0	0	0	7
PYGM	0	1	1	1	0	0	1	0	0	0	0	0	0	0	0	0	0	0	1	0	0	1	0	1	0	7
GREM2	0	1	1	1	0	1	1	1	0	0	0	0	0	0	0	0	0	0	0	0	0	1	0	0	0	7
VIPR2	0	1	0	1	0	1	0	0	0	0	0	0	0	0	0	0	0	1	0	1	0	1	0	0	1	7
HDC	0	1	0	0	0	1	1	0	0	0	0	0	0	0	0	1	0	0	0	1	1	1	0	0	0	7
NTRK3	0	1	1	1	0	0	1	0	0	0	0	0	0	0	1	0	0	0	1	0	0	1	0	0	0	7
AOX1	0	1	1	0	1	0	0	0	0	0	0	0	0	0	0	0	1	1	1	0	0	0	0	1	0	7
ABCA9	0	1	1	1	0	0	1	0	0	0	0	0	0	0	1	0	1	0	0	0	0	0	0	0	1	7
ABCA6	0	1	1	1	0	0	1	0	0	0	0	0	0	0	1	1	1	0	0	0	0	0	0	0	0	7
TMEM132C	0	1	1	1	0	0	0	0	0	0	0	0	0	0	1	0	0	1	1	0	0	1	0	0	0	7
ITIH3	0	1	1	1	1	0	0	0	0	0	0	0	0	0	1	1	1	0	0	0	0	0	0	0	0	7
ARHGAP6	0	0	1	1	0	0	1	0	0	0	0	0	0	0	1	1	1	0	0	0	0	0	0	1	0	7
ASPA	0	0	1	0	0	0	1	0	0	0	0	0	0	0	1	1	0	0	1	0	0	1	0	1	0	7
EDNRB	0	0	1	1	0	1	1	0	0	0	0	0	0	0	1	1	0	0	0	1	0	0	0	0	0	7
CA4	0	0	1	0	0	1	0	0	0	0	0	0	0	0	1	1	0	1	0	1	0	0	0	1	0	7
PRELP	1	1	1	1	0	0	1	0	0	1	0	0	0	0	0	0	0	0	0	0	0	0	0	0	0	6
RAI2	1	1	0	1	0	0	1	0	0	0	0	0	0	0	1	0	0	0	0	0	0	1	0	0	0	6
ADAMTSL3	1	1	0	0	0	0	1	0	0	0	0	0	0	0	1	1	0	0	0	0	0	1	0	0	0	6
NR2F1	1	1	1	1	0	0	0	0	0	0	0	0	0	0	0	1	1	0	0	0	0	0	0	0	0	6
ABCC9	0	1	1	1	0	0	1	0	0	0	0	0	0	0	0	1	0	0	1	0	0	0	0	0	0	6
CCDC69	0	1	1	0	0	0	0	0	0	0	0	0	0	0	1	1	0	0	1	0	0	1	0	0	0	6
CNN1	0	1	1	1	0	0	1	0	0	0	0	0	0	0	0	0	0	0	1	0	0	1	0	0	0	6
COL14A1	0	1	1	1	0	0	1	0	0	0	0	0	0	0	0	1	1	0	0	0	0	0	0	0	0	6
CYYR1	0	1	1	1	0	0	0	0	0	1	0	0	0	0	1	0	0	0	0	0	0	0	0	0	1	6
DCN	0	1	1	1	0	0	0	0	0	0	0	0	0	1	0	0	0	0	0	0	0	1	0	0	1	6
DES	0	1	0	0	0	0	1	0	0	0	0	0	0	0	1	1	0	0	1	0	0	1	0	0	0	6
GNA14	0	1	0	1	0	0	0	0	0	0	0	0	0	1	0	1	1	0	0	0	0	0	0	1	0	6
GNG7	0	1	0	1	0	0	1	0	0	0	0	0	0	0	1	1	0	0	0	0	0	1	0	0	0	6
HSD17B6	0	1	0	1	1	0	0	0	0	0	0	0	0	1	1	1	0	0	0	0	0	0	0	0	0	6
HSPB6	0	1	1	0	0	0	1	0	0	0	0	0	0	0	0	1	0	0	1	0	0	1	0	0	0	6
LRRK2	0	1	0	0	0	0	0	0	0	0	0	0	1	0	1	1	0	0	1	0	0	1	0	0	0	6
NEGR1	0	1	0	1	0	1	1	1	0	0	0	0	0	0	0	0	0	0	0	0	0	1	0	0	0	6
PCDH18	0	1	1	1	0	1	0	0	0	0	0	0	0	0	0	0	0	0	1	0	0	0	0	0	1	6
RHOJ	0	1	1	1	0	0	0	0	0	0	0	0	0	0	1	1	0	0	0	0	0	0	0	0	1	6
S1PR1	0	1	1	1	0	0	1	0	0	0	0	0	0	0	1	1	0	0	0	0	0	0	0	0	0	6
TPSB2	0	1	0	0	0	1	0	0	0	0	0	0	0	0	1	0	0	0	0	1	1	1	0	0	0	6
ADAM33	0	1	1	1	0	1	1	0	0	0	0	0	0	0	0	0	0	0	0	0	0	1	0	0	0	6
HSPB7	0	1	1	1	0	0	1	0	0	0	0	0	0	0	0	1	0	0	1	0	0	0	0	0	0	6
KCNMB1	0	1	1	1	0	0	1	0	0	0	0	0	0	0	0	0	0	0	1	0	0	1	0	0	0	6
SGCA	0	1	0	1	0	0	1	0	0	0	0	0	0	0	1	1	0	0	0	0	0	1	0	0	0	6
SRL	0	1	1	0	0	0	1	0	0	1	0	0	0	0	1	0	0	0	1	0	0	0	0	0	0	6
PDE1A	0	1	1	1	0	0	1	0	0	0	0	0	0	0	0	1	0	0	0	0	0	1	0	0	0	6
MS4A2	0	1	0	0	0	1	0	0	0	0	0	0	0	0	1	1	0	0	0	1	0	1	0	0	0	6
ADCY5	0	1	1	0	0	0	1	1	0	0	0	0	0	0	0	0	0	1	1	0	0	0	0	0	0	6
PABPC5	0	1	1	1	0	0	1	0	0	0	0	0	0	0	0	0	1	0	0	0	0	0	0	0	1	6
GYPC	0	1	0	1	0	0	1	0	0	1	0	0	0	0	0	1	0	0	0	0	0	1	0	0	0	6
LRFN5	0	1	1	1	0	0	1	1	0	0	0	0	0	0	0	0	0	0	1	0	0	0	0	0	0	6
RSPO3	0	1	1	1	0	0	0	1	0	0	0	0	0	1	0	0	0	0	1	0	0	0	0	0	0	6
MEF2C	0	1	1	1	0	0	0	0	0	0	0	0	0	0	1	1	0	0	0	0	0	0	0	0	1	6
CADM3	0	1	1	1	0	0	0	0	0	0	0	0	0	0	0	1	0	0	0	1	0	1	0	0	0	6
TACR1	0	1	1	1	0	0	1	0	1	0	0	0	0	0	0	0	0	0	0	0	0	1	0	0	0	6
C16orf89	0	1	0	0	0	0	1	0	0	0	0	0	0	0	0	1	0	0	1	0	0	1	0	1	0	6
SFRP1	0	1	0	1	0	0	0	0	0	1	1	0	0	0	0	0	0	0	0	0	0	1	0	0	1	6
TCEAL2	0	1	1	1	0	0	0	0	0	0	0	0	0	0	1	0	0	1	1	0	0	0	0	0	0	6
SIGLECP3	0	1	0	0	0	1	0	0	0	0	0	0	0	0	1	1	0	0	0	1	0	1	0	0	0	6
HPGDS	0	1	0	0	0	1	0	0	0	0	0	0	0	0	1	1	0	0	0	1	0	1	0	0	0	6
GFRA1	0	1	0	1	0	1	1	0	0	0	0	0	0	0	1	0	0	0	0	0	0	1	0	0	0	6
LDB3	0	1	0	0	0	0	1	0	0	1	0	0	0	0	1	0	0	0	1	0	0	1	0	0	0	6
MEOX1	0	1	1	1	0	1	0	0	0	0	0	0	0	0	0	0	0	0	0	1	1	0	0	0	0	6
LMO3	0	1	0	1	0	0	1	0	0	0	0	0	0	0	1	1	0	1	0	0	0	0	0	0	0	6
BMX	0	1	1	1	0	0	1	0	0	0	0	0	0	1	0	0	0	0	0	0	0	1	0	0	0	6
PDE2A	0	1	1	0	0	0	0	1	0	1	0	0	0	1	0	0	0	0	0	0	0	1	0	0	0	6
SULT1C4	0	1	0	1	0	0	1	0	0	0	0	0	0	0	1	1	0	0	0	0	0	0	0	1	0	6
PDK4	0	0	1	0	0	0	1	0	0	0	0	0	1	0	0	1	0	0	1	0	0	1	0	0	0	6
PPP1R16B	0	0	1	0	0	1	1	1	0	0	0	0	0	0	0	1	0	0	0	1	0	0	0	0	0	6
ALDH1A2	0	0	1	1	0	0	0	0	0	0	0	0	0	0	0	1	0	0	1	1	0	0	0	0	1	6
SCN4B	0	0	1	0	0	1	0	0	0	0	0	0	0	0	1	0	0	0	1	1	0	1	0	0	0	6
C6	0	0	1	0	1	0	1	0	0	0	0	0	0	1	0	1	0	1	0	0	0	0	0	0	0	6
PREX2	0	0	1	1	0	0	1	0	0	0	0	0	0	0	1	1	0	0	0	0	0	0	0	1	0	6
MAMDC2	0	0	1	0	0	1	0	0	0	0	0	0	0	0	1	0	0	0	1	0	0	1	0	0	1	6
ACVRL1	0	0	1	1	0	1	0	0	0	0	0	0	1	0	0	1	0	0	0	1	0	0	0	0	0	6
ACSM5	0	0	1	0	1	0	0	0	0	1	0	0	0	1	1	1	0	0	0	0	0	0	0	0	0	6
LRRC4B	0	0	1	1	0	1	1	0	0	0	0	0	0	0	0	0	1	0	0	0	0	0	0	0	1	6
CLCA4	0	0	1	0	0	1	0	1	0	0	0	0	0	0	0	0	0	0	1	1	1	0	0	0	0	6
ARHGEF6	0	0	0	1	0	1	1	0	0	0	0	0	0	0	1	1	0	0	0	1	0	0	0	0	0	6
PKNOX2	0	0	0	1	0	0	0	0	0	0	0	0	0	0	1	1	0	1	0	0	0	1	0	1	0	6
CYSLTR1	0	0	0	1	0	1	0	0	0	0	0	0	0	0	1	1	0	0	0	1	0	1	0	0	0	6
ZNF536	0	0	0	0	0	1	1	1	0	0	0	0	0	0	0	0	0	0	0	1	0	1	0	1	0	6
COL4A3	1	0	0	0	0	1	1	0	0	0	0	0	0	0	1	1	0	0	0	0	0	0	0	0	0	5
ABCB1	0	1	1	0	0	0	1	0	0	1	0	0	0	0	0	0	0	0	0	0	0	0	0	0	1	5
APOD	0	1	1	1	0	0	1	0	0	0	0	0	0	0	0	0	0	0	0	0	0	0	0	0	1	5
ARHGEF15	0	1	1	1	0	0	0	0	0	0	0	0	0	0	1	1	0	0	0	0	0	0	0	0	0	5
ATP1B2	0	1	1	1	0	0	1	0	0	0	0	0	0	0	0	0	0	0	1	0	0	0	0	0	0	5
CACNA1C	0	1	1	1	0	0	1	0	0	0	0	0	0	0	0	0	0	0	1	0	0	0	0	0	0	5
CD34	0	1	1	1	0	0	0	0	0	0	0	0	0	0	1	1	0	0	0	0	0	0	0	0	0	5
CLDN5	0	1	1	1	0	0	0	0	0	0	0	0	0	0	0	1	0	0	0	0	0	1	0	0	0	5
CLEC14A	0	1	1	1	0	0	0	0	0	0	0	0	0	0	1	1	0	0	0	0	0	0	0	0	0	5
CRISPLD2	0	1	0	1	0	0	1	0	0	1	0	0	1	0	0	0	0	0	0	0	0	0	0	0	0	5
CXCL12	0	1	1	1	0	0	0	0	0	0	0	0	0	0	0	0	0	0	0	0	0	1	0	0	1	5
CXorf36	0	1	1	1	0	0	0	0	0	0	0	0	0	0	0	1	0	0	0	0	0	0	0	0	1	5
DAAM2	0	1	0	1	0	0	1	0	0	0	0	0	0	0	0	0	0	0	1	0	0	1	0	0	0	5
FGF7	0	1	1	1	0	0	0	0	0	0	0	0	0	0	0	1	0	0	0	0	0	0	0	0	1	5
FGL2	0	1	0	0	0	0	0	0	0	1	0	0	1	0	0	1	0	0	0	0	0	1	0	0	0	5
FILIP1L	0	1	0	1	0	0	1	0	0	1	0	0	0	0	0	0	1	0	0	0	0	0	0	0	0	5
GAS7	0	1	1	1	0	0	0	0	0	0	0	0	0	0	0	1	1	0	0	0	0	0	0	0	0	5
JAM3	0	1	1	1	0	0	1	0	0	0	0	0	0	0	0	0	1	0	0	0	0	0	0	0	0	5
KANK2	0	1	1	0	0	0	1	0	0	0	0	0	0	0	1	0	0	0	1	0	0	0	0	0	0	5
LHFP	0	1	1	1	0	0	0	0	0	0	0	0	0	0	1	0	1	0	0	0	0	0	0	0	0	5
LRRC32	0	1	1	1	0	0	0	0	0	1	0	0	0	0	0	1	0	0	0	0	0	0	0	0	0	5
MEG3	0	1	1	1	0	0	0	0	0	1	0	0	0	0	0	0	1	0	0	0	0	0	0	0	0	5
MGP	0	1	0	1	0	0	0	0	0	1	0	0	0	0	1	1	0	0	0	0	0	0	0	0	0	5
MSRB3	0	1	1	1	0	0	0	0	0	0	0	0	0	0	0	0	1	0	1	0	0	0	0	0	0	5
MYLK	0	1	1	1	0	0	0	0	0	0	0	0	0	0	0	0	0	0	1	0	0	0	0	0	1	5
OLFM1	0	1	0	0	0	0	0	1	0	0	0	0	0	1	1	0	0	0	0	0	0	1	0	0	0	5
PDGFRA	0	1	1	1	0	1	0	0	0	0	0	0	0	0	0	0	1	0	0	0	0	0	0	0	0	5
PHYHIP	0	1	1	0	0	0	0	1	0	0	0	0	0	0	0	0	0	0	1	0	0	0	0	0	1	5
RASL12	0	1	1	1	0	0	0	0	0	0	0	0	0	0	0	1	0	0	1	0	0	0	0	0	0	5
SMOC2	0	1	0	1	0	0	1	0	0	1	0	0	0	0	0	0	0	0	0	0	0	0	0	1	0	5
SNED1	0	1	0	1	0	0	1	0	0	0	0	0	0	0	0	1	1	0	0	0	0	0	0	0	0	5
SORBS1	0	1	1	1	0	0	1	0	0	0	0	0	0	0	0	0	0	0	1	0	0	0	0	0	0	5
SPON1	0	1	0	1	0	0	0	0	0	0	0	0	0	0	0	1	0	0	1	1	0	0	0	0	0	5
ZEB1	0	1	1	1	0	0	0	0	0	0	0	0	0	0	0	0	1	0	0	0	0	0	0	0	1	5
PLN	0	1	0	1	0	0	1	0	0	0	0	0	0	0	0	1	0	0	0	0	0	1	0	0	0	5
GPR133	0	1	1	0	0	0	1	0	0	0	0	0	0	0	0	1	0	0	0	0	0	0	0	0	1	5
WBSCR17	0	1	0	1	0	0	1	1	0	0	0	0	0	0	0	0	0	0	0	0	0	1	0	0	0	5
CASQ2	0	1	1	0	0	0	1	0	0	0	0	0	0	0	1	0	0	0	0	0	0	1	0	0	0	5
P2RX1	0	1	0	0	0	1	1	0	0	0	0	0	0	0	0	0	0	1	1	0	0	0	0	0	0	5
CTSG	0	1	1	0	0	0	0	0	0	0	0	0	0	0	1	1	0	0	0	1	0	0	0	0	0	5
RUNX1T1	0	1	1	1	0	0	0	0	0	0	0	0	0	0	0	0	0	0	0	0	0	0	0	1	1	5
SORCS1	0	1	0	1	0	1	0	0	0	0	0	0	0	0	0	0	0	0	1	0	0	1	0	0	0	5
FGF10	0	1	0	1	0	0	1	0	0	0	0	0	0	0	0	0	0	0	1	0	0	1	0	0	0	5
AGTR1	0	1	0	1	1	0	0	0	0	0	0	0	0	0	0	1	0	0	0	0	0	0	0	1	0	5
MEOX2	0	1	1	1	0	0	0	0	0	0	0	0	0	0	1	1	0	0	0	0	0	0	0	0	0	5
FXYD1	0	1	1	0	0	0	0	0	0	1	0	0	0	0	1	0	0	0	0	0	0	1	0	0	0	5
RGS13	0	1	0	0	0	0	1	0	0	0	0	0	0	0	1	1	0	0	0	0	0	1	0	0	0	5
RGS22	0	1	0	1	0	0	0	0	0	0	0	0	0	0	1	0	0	0	1	0	0	0	1	0	0	5
DPT	0	1	1	1	0	0	0	0	0	0	0	0	0	1	0	0	0	0	0	0	0	1	0	0	0	5
PPAPDC3	0	1	1	1	0	0	0	0	0	0	0	0	0	0	0	0	1	0	1	0	0	0	0	0	0	5
CNTN4	0	1	0	1	0	0	1	1	0	0	0	0	0	0	0	0	0	0	0	0	0	0	0	0	1	5
PI16	0	1	1	0	0	0	1	0	0	1	0	0	0	0	0	0	0	0	0	0	0	1	0	0	0	5
ZNF835	0	1	0	1	0	0	1	0	0	0	0	0	0	0	0	1	0	1	0	0	0	0	0	0	0	5
ZBTB16	0	1	1	0	0	0	1	0	0	0	0	0	0	0	0	1	0	0	0	0	0	1	0	0	0	5
HSD11B1	0	1	1	0	0	0	0	0	0	0	0	0	0	1	0	1	1	0	0	0	0	0	0	0	0	5
CCL21	0	1	1	1	0	0	0	0	0	0	0	0	0	0	0	1	0	0	0	0	0	0	0	0	1	5
SLC1A7	0	1	1	1	0	0	1	0	0	0	0	0	0	0	0	1	0	0	0	0	0	0	0	0	0	5
ECM2	0	1	1	1	0	0	0	0	0	0	0	0	0	0	0	0	1	0	0	0	0	0	0	0	1	5
PLAC9	0	1	1	1	0	0	0	0	0	0	0	0	0	0	1	0	0	0	0	0	0	1	0	0	0	5
PDZD4	0	1	0	0	0	0	0	1	0	0	0	0	1	0	1	0	0	0	0	0	0	1	0	0	0	5
GGTA1	0	1	1	0	0	0	0	0	0	0	0	0	0	0	1	1	0	0	0	0	0	1	0	0	0	5
GPIHBP1	0	1	1	1	0	0	0	0	0	0	0	0	0	0	1	1	0	0	0	0	0	0	0	0	0	5
PTGER2	0	1	0	1	0	0	0	0	0	0	0	0	0	0	0	1	0	0	1	1	0	0	0	0	0	5
LRRC2	0	1	1	1	0	0	0	0	0	0	0	0	0	0	0	1	0	0	0	0	0	0	0	1	0	5
ANK2	0	0	1	1	0	0	1	0	0	0	0	0	0	0	0	1	0	0	0	0	0	1	0	0	0	5
CORO2B	0	0	1	1	0	0	0	0	0	0	0	0	0	0	1	0	0	0	1	0	0	0	0	1	0	5
FLRT2	0	0	1	0	0	0	0	0	0	0	0	0	0	0	0	0	1	1	1	0	0	0	0	0	1	5
FMO2	0	0	1	0	0	0	0	0	1	0	0	0	0	1	1	0	0	0	1	0	0	0	0	0	0	5
PDGFD	0	0	1	1	0	0	1	0	0	0	0	0	0	0	0	0	0	1	1	0	0	0	0	0	0	5
RECK	0	0	1	1	0	0	1	0	0	0	0	0	0	0	0	0	1	0	0	0	0	1	0	0	0	5
TSPAN11	0	0	1	1	0	1	0	0	0	0	0	0	0	0	0	0	0	0	1	1	0	0	0	0	0	5
GDF10	0	0	1	1	0	0	0	0	0	0	0	0	0	0	1	1	0	0	0	0	0	0	0	1	0	5
KL	0	0	1	1	0	0	1	0	0	0	0	0	0	0	0	1	0	0	0	0	0	1	0	0	0	5
DNASE1L3	0	0	1	0	0	1	0	0	0	0	0	0	0	1	1	0	0	0	0	1	0	0	0	0	0	5
FAM13C	0	0	1	1	0	0	0	0	0	0	0	0	0	0	1	0	1	0	0	0	0	0	0	1	0	5
CRHBP	0	0	1	0	1	0	0	1	0	0	0	0	0	1	0	0	0	0	0	0	0	1	0	0	0	5
ZNF208	0	0	1	1	0	0	1	0	0	0	0	0	0	0	0	0	0	1	1	0	0	0	0	0	0	5
ARHGAP24	0	0	1	0	0	0	0	0	0	0	0	0	1	0	1	0	0	0	0	0	0	1	0	1	0	5
MMP28	0	0	1	0	0	0	0	0	0	0	0	0	0	0	1	0	0	0	0	1	1	0	1	0	0	5
ACACB	0	0	1	0	0	0	1	0	0	0	0	0	0	0	0	0	0	0	1	0	0	1	0	1	0	5
GFRA2	0	0	1	1	0	1	0	0	0	0	0	0	0	0	1	0	0	0	0	0	0	1	0	0	0	5
ITGA9	0	0	1	1	0	0	1	0	0	0	0	0	0	0	0	1	0	0	1	0	0	0	0	0	0	5
PDE1C	0	0	1	0	0	1	1	0	0	0	0	0	0	0	0	0	0	0	0	1	0	1	0	0	0	5
RASSF2	0	0	0	1	0	1	1	0	0	0	0	0	0	0	1	1	0	0	0	0	0	0	0	0	0	5
NAP1L2	0	0	0	1	0	1	0	1	0	0	0	0	0	0	0	0	0	1	0	0	0	1	0	0	0	5
MUM1L1	0	0	0	1	0	0	0	1	0	0	0	0	0	0	0	0	1	1	0	0	0	0	1	0	0	5
KCNA5	0	0	0	1	0	0	1	1	0	0	0	0	0	0	1	1	0	0	0	0	0	0	0	0	0	5
GNAO1	0	0	0	0	0	1	0	1	0	0	0	0	0	1	0	0	0	0	1	0	0	1	0	0	0	5
PRKCB	0	0	0	0	0	1	0	1	0	0	0	0	0	0	1	1	0	0	1	0	0	0	0	0	0	5
CD1C	0	0	0	0	0	1	0	0	0	1	0	0	0	0	1	1	0	0	0	1	0	0	0	0	0	5
CBX7	0	0	0	0	0	0	1	0	0	0	0	0	1	0	1	0	0	0	1	0	0	1	0	0	0	5
SLC18A2	0	0	0	0	0	0	1	0	0	0	0	0	0	0	1	1	0	0	1	1	0	0	0	0	0	5
SLC4A4	0	0	0	0	0	0	1	0	0	0	0	0	0	0	0	1	0	1	0	1	0	0	0	1	0	5
SIGLEC6	0	0	0	0	0	0	1	0	0	0	0	0	0	0	1	1	0	0	0	1	0	1	0	0	0	5
AJAP1	0	0	0	0	0	0	0	1	0	1	0	0	0	0	0	0	0	1	1	0	1	0	0	0	0	5
VIPR1	0	0	0	0	0	0	0	1	0	0	0	0	1	1	1	0	0	0	0	0	1	0	0	0	0	5
ATP13A4	0	0	0	0	0	0	0	0	1	0	0	0	0	0	1	0	0	1	0	1	1	0	0	0	0	5
CYP27A1	0	0	0	0	0	0	0	0	0	1	0	0	1	0	1	1	0	0	1	0	0	0	0	0	0	5
GPM6A	0	0	0	0	0	0	0	0	0	0	0	0	0	1	1	1	0	0	0	0	0	1	0	1	0	5

## Sheet: Data 3
Supplementary Data 3. Proteins with significantly higher (or lower) expression levels in high-DEPTH-score than in low-DEPTH-score tumors in at least 5 cancer types
1. Proteins whose expression levels are significantly higher in high-DEPTH-score than in low-DEPTH-score tumors in at least 5 cancer types
“1” indicates that the protein has significantly higher expression levels in high-DEPTH-score than in low-DEPTH-score tumors (two-sided Student's t test, FDR<0.05);
“0” indicates that the protein has no significantly differential expression between high-DEPTH-score and low-DEPTH-score tumors;
"Total" indicates the number of cancer types in which the protein has significantly higher expression levels in high-DEPTH-score than in low-DEPTH-score tumors.
Protein	BLCA	BRCA	COAD	ESCA	GBM	HNSC	KIRC	KIRP	LIHC	LUAD	LUSC	OV	PAAD	PRAD	READ	SKCM	STAD	THCA	UCEC	Total
PCNA	1	1	0	0	0	0	1	0	1	1	1	1	0	1	0	1	1	1	1	12
Cyclin_B1	1	1	0	1	0	0	1	0	1	1	0	1	0	1	0	0	1	0	1	10
MSH6	1	1	0	0	0	0	0	1	1	1	1	0	0	1	0	1	1	0	1	10
4E-BP1	1	1	0	1	0	0	1	0	1	1	0	0	0	1	0	1	1	1	0	10
TFRC	1	1	0	0	0	0	1	1	1	1	1	0	0	1	0	0	1	0	0	9
Chk2	1	1	0	0	0	0	1	0	0	1	1	1	0	1	0	0	1	1	0	9
FoxM1	1	1	1	0	0	0	1	0	0	1	0	1	0	0	0	1	1	0	1	9
PAI-1	0	0	1	1	0	1	1	0	1	1	0	0	0	1	0	0	1	0	1	9
RBM15	1	1	0	0	0	0	0	1	1	0	0	1	0	1	0	1	1	0	0	8
MSH2	1	1	0	0	0	0	0	0	0	1	1	1	0	1	0	1	0	1	0	8
S6	1	1	0	0	0	0	0	0	1	1	0	0	0	1	0	1	1	1	0	8
eEF2	1	1	0	0	0	0	1	0	1	1	0	0	0	1	0	0	1	1	0	8
ASNS	0	1	1	0	0	0	1	0	0	1	1	1	0	1	0	0	1	0	0	8
ACC1	0	1	0	0	0	0	1	0	1	0	1	1	0	1	0	0	1	1	0	8
Cyclin_E2	1	1	0	0	0	0	0	0	1	1	1	0	0	0	0	1	1	0	0	7
4E-BP1_pT70	0	1	1	0	0	0	1	0	1	1	0	0	0	0	0	0	1	1	0	7
p70S6K	0	1	0	0	0	0	0	0	1	1	0	0	0	1	0	1	1	1	0	7
Syk	0	1	0	0	1	0	0	0	1	0	0	1	0	1	1	0	1	0	0	7
XRCC1	0	1	0	0	1	1	0	0	0	1	1	0	0	1	0	0	1	0	0	7
SF2	1	1	0	0	0	0	0	0	0	1	1	0	0	1	0	0	1	0	0	6
GAPDH	1	1	0	0	0	0	0	0	1	1	0	1	0	0	0	0	1	0	0	6
Rb_pS807_S811	1	1	0	0	0	0	0	0	0	1	0	0	0	1	0	0	1	1	0	6
Cyclin_E1	0	1	0	0	0	0	0	1	0	1	0	1	0	1	0	0	1	0	0	6
Chk2_pT68	0	1	0	0	0	0	1	0	1	1	1	0	0	0	0	0	1	0	0	6
cIAP	0	1	0	0	0	0	0	0	1	1	0	1	0	1	0	0	1	0	0	6
MIG-6	0	1	1	0	0	0	0	0	0	1	0	0	0	1	0	0	1	0	1	6
FASN	0	0	0	0	0	0	0	1	0	1	0	1	0	1	0	0	1	0	1	6
TIGAR	0	0	0	0	0	0	0	0	1	1	0	0	1	1	1	0	1	0	0	6
ER-alpha_pS118	1	1	0	0	0	0	0	0	0	0	0	0	0	1	0	1	1	0	0	5
Claudin-7	1	1	0	0	0	0	0	0	0	1	0	1	0	0	0	0	1	0	0	5
4E-BP1_pS65	1	1	0	0	0	0	0	1	1	1	0	0	0	0	0	0	0	0	0	5
Smac	1	1	0	0	0	0	1	0	1	0	0	0	0	0	0	0	0	1	0	5
eIF4G	0	1	0	0	0	0	0	0	0	0	0	1	0	1	0	1	0	0	1	5
Bap1-c-4	0	1	0	0	0	0	0	0	0	0	0	1	0	1	0	1	1	0	0	5
Dvl3	0	1	0	0	0	0	0	1	0	1	0	0	0	1	0	0	0	1	0	5
B-Raf	0	1	0	0	0	0	0	0	1	0	0	1	0	1	0	0	0	0	1	5
Ku80	0	1	0	0	0	0	0	0	1	0	0	1	0	1	0	0	1	0	0	5
Caspase-7_cleavedD198	0	1	0	0	0	0	0	0	1	1	0	1	0	0	0	0	1	0	0	5
GSK3-alpha-beta	0	1	0	0	0	0	0	0	1	0	0	1	0	0	0	0	1	1	0	5
Bim	0	0	0	0	1	0	0	0	1	1	0	0	0	1	0	0	1	0	0	5
2. Proteins whose expression levels are significantly lower in high-DEPTH-score than in low-DEPTH-score tumors in at least 5 cancer types
“1” indicates that the protein has significantly lower expression levels in high-DEPTH-score than in low-DEPTH-score tumors (Student's t test, FDR<0.05);
“0” indicates that the protein has no significantly differential expression between high-DEPTH-score and low-DEPTH-score tumors;
"Total" indicates the number of cancer types in which the protein has significantly lower expression levels in high-DEPTH-score than in low-DEPTH-score tumors.
Protein	BLCA	BRCA	COAD	ESCA	GBM	HNSC	KIRC	KIRP	LIHC	LUAD	LUSC	OV	PAAD	PRAD	READ	SKCM	STAD	TGCT	THCA	UCEC	Total
MYH11	1	1	0	0	0	0	1	1	1	1	1	1	0	1	0	1	1	0	0	1	12
STAT3_pY705	1	1	0	1	0	1	1	0	1	1	1	0	0	1	0	1	0	0	1	0	11
Caveolin-1	1	1	0	0	0	0	1	0	0	1	1	1	0	1	0	1	1	0	0	1	10
PKC-alpha_pS657	1	1	0	1	0	0	0	0	0	1	1	1	0	1	0	0	1	0	0	1	9
Collagen_VI	1	1	0	0	0	0	1	0	0	1	0	1	0	1	0	1	1	0	1	0	9
JNK_pT183_pY185	0	1	0	0	1	0	0	1	1	1	0	1	0	1	0	1	1	0	0	0	9
c-Kit	0	1	1	0	1	0	0	1	0	0	0	1	0	1	1	0	1	0	1	0	9
Src_pY527	0	1	0	0	0	0	1	0	0	1	1	1	0	1	0	1	0	0	1	0	8
Rictor	1	0	0	1	0	0	1	0	0	1	0	0	0	1	0	0	1	0	0	1	7
FOXO3a_pS318_S321	1	0	0	1	0	0	1	0	1	0	0	0	0	1	0	1	1	0	0	0	7
PKC-alpha	1	1	0	0	0	0	0	0	0	1	0	0	0	1	0	0	1	0	1	1	7
PR	1	1	0	0	0	0	0	1	1	0	0	0	0	1	0	0	1	0	0	1	7
JNK2	1	1	0	0	0	0	0	0	0	1	1	0	0	0	1	0	1	0	1	0	7
MAPK_pT202_Y204	0	1	0	0	0	0	1	0	1	1	1	0	0	0	0	0	1	0	1	0	7
ER-alpha	1	1	0	0	0	0	0	1	1	0	0	0	0	0	0	0	1	0	0	1	6
Bcl-2	1	1	0	0	0	0	0	0	1	0	0	0	0	0	0	0	1	0	1	1	6
Rictor_pT1135	1	1	0	0	0	0	0	0	0	1	0	1	0	1	0	0	1	0	0	0	6
PKC-delta_pS664	0	0	0	1	1	0	0	0	1	1	0	0	0	1	0	0	1	0	0	0	6
Transglutaminase	1	0	0	0	0	1	0	0	0	1	1	0	0	0	0	0	0	0	1	0	5
INPP4B	1	1	0	1	0	0	0	0	1	0	0	0	0	0	0	0	1	0	0	0	5
ACVRL1	1	1	0	0	0	0	0	0	1	0	0	0	0	1	0	0	1	0	0	0	5
p27	0	1	0	0	0	0	0	0	1	1	1	0	0	0	0	0	0	0	1	0	5
YAP_pS127	0	1	0	0	0	0	0	0	0	1	0	1	0	1	0	0	1	0	0	0	5
c-Met	0	1	0	0	0	0	0	0	1	1	0	1	0	0	0	0	0	0	1	0	5
AR	0	1	0	0	0	0	0	0	1	0	0	0	0	0	0	0	0	1	1	1	5
p70S6K_pT389	0	1	0	0	1	0	0	0	1	1	0	0	0	1	0	0	0	0	0	0	5
Rb	0	1	0	0	0	0	0	0	1	1	0	1	0	0	0	0	0	0	1	0	5
Akt_pS473	0	1	0	0	0	0	1	0	1	1	0	0	0	1	0	0	0	0	0	0	5
Akt_pT308	0	1	0	0	0	0	0	0	1	1	0	0	0	1	0	0	1	0	0	0	5
Cyclin_D1	0	1	0	0	0	0	0	0	0	0	0	1	0	1	0	0	1	0	1	0	5
PKC-pan_BetaII_pS660	0	0	1	0	1	0	0	0	0	1	0	0	0	1	0	0	1	0	0	0	5
EGFR_pY1068	0	0	1	0	0	0	0	0	1	1	0	0	0	1	0	1	0	0	0	0	5
CD31	0	0	0	0	0	0	1	1	1	1	1	0	0	0	0	0	0	0	0	0	5

## Sheet: Data 4
Supplementary Data 4. Clone numbers inferred by DEPTH across cancer types
Sample ID	Clone numbers	Cancer type
TCGA-EJ-5503-01A-01R-1580-07	1	PRAD
TCGA-EJ-7791-01A-11R-2118-07	1	PRAD
TCGA-H9-A6BX-01A-31R-A311-07	1	PRAD
TCGA-XK-AAJU-01A-11R-A41O-07	1	PRAD
TCGA-G9-6385-01A-11R-1789-07	1	PRAD
TCGA-V1-A8MK-01A-11R-A36G-07	1	PRAD
TCGA-EJ-A8FU-01A-11R-A36G-07	1	PRAD
TCGA-G9-6367-01A-11R-1789-07	1	PRAD
TCGA-EJ-A7NG-01A-31R-A33R-07	2	PRAD
TCGA-EJ-A46I-01A-12R-A26U-07	2	PRAD
TCGA-EJ-5498-01A-01R-1580-07	2	PRAD
TCGA-G9-6370-01A-11R-1789-07	2	PRAD
TCGA-EJ-A8FP-01A-21R-A36G-07	2	PRAD
TCGA-HC-7740-01A-11R-2118-07	2	PRAD
TCGA-EJ-7331-01A-11R-2118-07	2	PRAD
TCGA-EJ-5515-01A-01R-1580-07	2	PRAD
TCGA-EJ-A46B-01A-31R-A250-07	2	PRAD
TCGA-YL-A9WX-01A-21R-A41O-07	2	PRAD
TCGA-G9-6329-01A-13R-1965-07	2	PRAD
TCGA-FC-7708-01A-11R-2118-07	2	PRAD
TCGA-CH-5789-01A-11R-1580-07	2	PRAD
TCGA-V1-A9Z8-01A-11R-A41O-07	2	PRAD
TCGA-HC-8258-01A-11R-2263-07	2	PRAD
TCGA-HC-8260-01A-11R-2263-07	2	PRAD
TCGA-HI-7170-01A-11R-2118-07	2	PRAD
TCGA-EJ-AB27-01A-11R-A41O-07	2	PRAD
TCGA-HC-7745-01A-11R-2118-07	2	PRAD
TCGA-HC-A8D1-01A-11R-A36G-07	2	PRAD
TCGA-CH-5746-01A-11R-1580-07	2	PRAD
TCGA-HC-7750-01A-11R-2118-07	2	PRAD
TCGA-EJ-A7NJ-01A-22R-A352-07	2	PRAD
TCGA-EJ-A6RA-01A-11R-A33R-07	2	PRAD
TCGA-KC-A4BL-01A-31R-A250-07	2	PRAD
TCGA-EJ-5531-01A-01R-1580-07	2	PRAD
TCGA-G9-7522-01A-11R-2263-07	2	PRAD
TCGA-EJ-A46E-01A-31R-A250-07	2	PRAD
TCGA-VP-A879-01A-11R-A352-07	2	PRAD
TCGA-EJ-A46D-01A-21R-A32Y-07	2	PRAD
TCGA-CH-5743-01A-21R-1580-07	2	PRAD
TCGA-ZG-A9L6-01A-11R-A41O-07	2	PRAD
TCGA-HC-A8D0-01A-11R-A36G-07	2	PRAD
TCGA-EJ-7794-01A-11R-2118-07	2	PRAD
TCGA-G9-7510-01A-11R-2263-07	2	PRAD
TCGA-CH-5771-01A-21R-1580-07	2	PRAD
TCGA-V1-A8WN-01A-11R-A37L-07	2	PRAD
TCGA-XK-AAJT-01A-11R-A41O-07	2	PRAD
TCGA-G9-6353-01A-11R-1965-07	2	PRAD
TCGA-M7-A71Y-01A-22R-A32O-07	2	PRAD
TCGA-EJ-5508-01A-02R-1580-07	2	PRAD
TCGA-EJ-A7NK-01A-12R-A352-07	2	PRAD
TCGA-EJ-5506-01A-01R-1580-07	2	PRAD
TCGA-G9-6336-01A-11R-1789-07	2	PRAD
TCGA-CH-5763-01A-11R-1580-07	2	PRAD
TCGA-M7-A720-01A-12R-A32O-07	2	PRAD
TCGA-G9-6356-01A-11R-1789-07	2	PRAD
TCGA-V1-A9OY-01A-11R-A41O-07	2	PRAD
TCGA-YL-A8SK-01B-21R-A37L-07	2	PRAD
TCGA-EJ-5512-01A-01R-1580-07	2	PRAD
TCGA-EJ-7783-01A-11R-2118-07	2	PRAD
TCGA-J4-A67T-01A-11R-A311-07	2	PRAD
TCGA-EJ-7115-01A-11R-2118-07	2	PRAD
TCGA-XK-AAJR-01A-11R-A41O-07	2	PRAD
TCGA-G9-6351-01A-21R-1965-07	2	PRAD
TCGA-EJ-5497-01A-02R-1580-07	2	PRAD
TCGA-J4-A83K-01A-11R-A352-07	2	PRAD
TCGA-KK-A8IM-01A-11R-A36G-07	2	PRAD
TCGA-QU-A6IP-01A-11R-A31N-07	2	PRAD
TCGA-J9-A52C-01A-11R-A26U-07	2	PRAD
TCGA-HC-7747-01A-11R-2118-07	2	PRAD
TCGA-HC-7748-01A-11R-2118-07	2	PRAD
TCGA-EJ-5522-01A-01R-1580-07	2	PRAD
TCGA-EJ-7328-01A-31R-2118-07	2	PRAD
TCGA-CH-5792-01A-11R-1580-07	2	PRAD
TCGA-EJ-7797-01A-11R-2263-07	2	PRAD
TCGA-KK-A8I7-01A-21R-A36G-07	2	PRAD
TCGA-J4-AATV-01A-11R-A41O-07	2	PRAD
TCGA-HC-7737-01A-11R-2118-07	2	PRAD
TCGA-XJ-A9DQ-01A-11R-A37L-07	2	PRAD
TCGA-EJ-A7NH-01A-12R-A33R-07	2	PRAD
TCGA-V1-A9OX-01A-11R-A41O-07	2	PRAD
TCGA-XK-AAIR-01A-11R-A41O-07	2	PRAD
TCGA-EJ-5526-01A-01R-1580-07	2	PRAD
TCGA-KC-A7FE-01A-12R-A33R-07	2	PRAD
TCGA-EJ-5527-01A-01R-1580-07	2	PRAD
TCGA-KK-A6E5-01A-11R-A311-07	2	PRAD
TCGA-EJ-7330-01A-11R-2118-07	2	PRAD
TCGA-G9-6384-01A-11R-1789-07	2	PRAD
TCGA-EJ-7781-01A-11R-2118-07	2	PRAD
TCGA-HC-8266-01A-11R-2263-07	2	PRAD
TCGA-CH-5762-01A-11R-1580-07	2	PRAD
TCGA-SU-A7E7-01A-22R-A33R-07	2	PRAD
TCGA-G9-6365-01A-11R-1789-07	2	PRAD
TCGA-EJ-7793-01A-31R-2263-07	2	PRAD
TCGA-M7-A721-01A-12R-A32O-07	2	PRAD
TCGA-KK-A7B2-01A-12R-A32O-07	2	PRAD
TCGA-EJ-5499-01A-01R-1580-07	2	PRAD
TCGA-EJ-A46H-01A-31R-A26U-07	2	PRAD
TCGA-J4-A83L-01A-11R-A352-07	2	PRAD
TCGA-G9-6348-01A-11R-1789-07	2	PRAD
TCGA-G9-6342-01A-11R-1965-07	2	PRAD
TCGA-V1-A9ZK-01A-11R-A41O-07	2	PRAD
TCGA-EJ-A8FO-01A-21R-A36G-07	2	PRAD
TCGA-EJ-5510-01A-01R-1580-07	2	PRAD
TCGA-G9-7509-01A-11R-A41O-07	2	PRAD
TCGA-EJ-5516-01A-01R-1580-07	2	PRAD
TCGA-V1-A9OH-01A-11R-A41O-07	2	PRAD
TCGA-EJ-5542-01A-01R-1580-07	2	PRAD
TCGA-XJ-A9DK-01A-11R-A37L-07	2	PRAD
TCGA-KK-A7AV-01A-11R-A32O-07	2	PRAD
TCGA-KK-A8IC-01A-11R-A36G-07	2	PRAD
TCGA-XJ-A9DI-01A-11R-A37L-07	2	PRAD
TCGA-YL-A9WJ-01A-11R-A37L-07	2	PRAD
TCGA-M7-A723-01A-12R-A32O-07	2	PRAD
TCGA-YL-A8SI-01A-11R-A41O-07	2	PRAD
TCGA-XJ-A83H-01A-11R-A352-07	2	PRAD
TCGA-EJ-5509-01A-01R-1580-07	2	PRAD
TCGA-G9-6378-01A-11R-1789-07	2	PRAD
TCGA-CH-5764-01A-21R-1580-07	2	PRAD
TCGA-ZG-A9LY-01A-11R-A41O-07	2	PRAD
TCGA-KC-A7F6-01A-11R-A33R-07	2	PRAD
TCGA-YL-A8SB-01A-31R-A37L-07	2	PRAD
TCGA-VN-A88I-01A-11R-A352-07	2	PRAD
TCGA-KK-A6DY-01A-12R-A311-07	2	PRAD
TCGA-G9-6377-01A-11R-1965-07	2	PRAD
TCGA-EJ-5501-01A-01R-1580-07	2	PRAD
TCGA-HC-7742-01A-11R-2118-07	2	PRAD
TCGA-V1-A8MU-01A-11R-A37L-07	2	PRAD
TCGA-CH-5745-01A-11R-1580-07	2	PRAD
TCGA-EJ-7785-01A-11R-2118-07	2	PRAD
TCGA-V1-A8MG-01A-11R-A36G-07	2	PRAD
TCGA-VP-A878-01A-31R-A352-07	2	PRAD
TCGA-HC-7818-01A-11R-2118-07	2	PRAD
TCGA-V1-A8MJ-01A-11R-A36G-07	2	PRAD
TCGA-EJ-7327-01A-11R-2118-07	2	PRAD
TCGA-G9-6333-01A-12R-1965-07	2	PRAD
TCGA-EJ-5532-01A-01R-1580-07	2	PRAD
TCGA-XA-A8JR-01A-11R-A36G-07	3	PRAD
TCGA-EJ-5495-01A-01R-1580-07	3	PRAD
TCGA-EJ-5496-01A-01R-1580-07	3	PRAD
TCGA-YL-A8HO-01A-11R-A36G-07	3	PRAD
TCGA-CH-5738-01A-11R-1580-07	3	PRAD
TCGA-EJ-5524-01A-01R-1580-07	3	PRAD
TCGA-EJ-8474-01A-11R-2403-07	3	PRAD
TCGA-CH-5748-01A-11R-1580-07	3	PRAD
TCGA-KC-A4BR-01A-32R-A32Y-07	3	PRAD
TCGA-J4-8198-01A-11R-2263-07	3	PRAD
TCGA-KC-A4BN-01A-61R-A250-07	3	PRAD
TCGA-YL-A8HK-01A-11R-A36G-07	3	PRAD
TCGA-V1-A8WL-01A-11R-A37L-07	3	PRAD
TCGA-2A-A8VL-01A-21R-A37L-07	3	PRAD
TCGA-HC-7078-01A-11R-2118-07	3	PRAD
TCGA-J4-A83M-01A-11R-A352-07	3	PRAD
TCGA-HC-8216-01A-11R-A29R-07	3	PRAD
TCGA-HC-7233-01A-11R-2118-07	3	PRAD
TCGA-KK-A8I6-01A-11R-A36G-07	3	PRAD
TCGA-ZG-A9LU-01A-11R-A41O-07	3	PRAD
TCGA-TK-A8OK-01A-22R-A36G-07	3	PRAD
TCGA-KC-A7F3-01A-21R-A33R-07	3	PRAD
TCGA-HC-7736-01A-11R-2118-07	3	PRAD
TCGA-CH-5768-01A-11R-1580-07	3	PRAD
TCGA-G9-6339-01A-12R-A311-07	3	PRAD
TCGA-HC-7210-01A-11R-2118-07	3	PRAD
TCGA-J9-A8CK-01A-11R-A352-07	3	PRAD
TCGA-HC-7817-01B-11R-A29R-07	3	PRAD
TCGA-J4-A83N-01A-11R-A352-07	3	PRAD
TCGA-HC-A6AS-01A-11R-A30B-07	3	PRAD
TCGA-FC-A8O0-01A-41R-A37L-07	3	PRAD
TCGA-J9-A8CM-01A-11R-A352-07	3	PRAD
TCGA-EJ-7318-01B-11R-A32O-07	3	PRAD
TCGA-EJ-7786-01A-11R-2118-07	3	PRAD
TCGA-ZG-A9L4-01A-11R-A41O-07	3	PRAD
TCGA-TP-A8TT-01A-12R-A41O-07	3	PRAD
TCGA-X4-A8KQ-01A-12R-A36G-07	3	PRAD
TCGA-EJ-5504-01A-01R-1580-07	3	PRAD
TCGA-V1-A9OA-01A-11R-A41O-07	3	PRAD
TCGA-KK-A6E6-01A-11R-A311-07	3	PRAD
TCGA-FC-A66V-01A-21R-A30B-07	3	PRAD
TCGA-HC-A76W-01A-11R-A33R-07	3	PRAD
TCGA-HC-7749-01A-11R-2118-07	3	PRAD
TCGA-J4-A6G3-01A-11R-A311-07	3	PRAD
TCGA-ZG-A8QZ-01A-11R-A37L-07	3	PRAD
TCGA-Y6-A8TL-01A-21R-A37L-07	3	PRAD
TCGA-G9-6371-01A-11R-1789-07	3	PRAD
TCGA-EJ-7321-01A-31R-2263-07	3	PRAD
TCGA-ZG-A9LS-01A-12R-A41O-07	3	PRAD
TCGA-HC-7820-01A-11R-2118-07	3	PRAD
TCGA-KK-A6E3-01A-21R-A30B-07	3	PRAD
TCGA-CH-5765-01A-11R-1580-07	3	PRAD
TCGA-EJ-5521-01A-01R-1580-07	3	PRAD
TCGA-V1-A9ZR-01A-11R-A41O-07	3	PRAD
TCGA-EJ-A6RC-01A-11R-A32O-07	3	PRAD
TCGA-J4-A67R-01A-21R-A30B-07	3	PRAD
TCGA-G9-6361-01A-21R-1965-07	3	PRAD
TCGA-G9-6494-01A-11R-1789-07	3	PRAD
TCGA-EJ-7317-01A-31R-2118-07	3	PRAD
TCGA-EJ-7314-01A-31R-2118-07	3	PRAD
TCGA-KK-A8IL-01A-11R-A36G-07	3	PRAD
TCGA-HC-7232-01A-11R-2118-07	3	PRAD
TCGA-KK-A8I9-01A-11R-A36G-07	3	PRAD
TCGA-KK-A8IJ-01A-11R-A352-07	3	PRAD
TCGA-HC-8265-01A-11R-2263-07	3	PRAD
TCGA-KK-A8I4-01A-11R-A36G-07	3	PRAD
TCGA-V1-A8ML-01A-11R-A37L-07	3	PRAD
TCGA-HI-7168-01A-11R-2118-07	3	PRAD
TCGA-HC-A6HY-01A-11R-A31N-07	3	PRAD
TCGA-V1-A9Z9-01A-21R-A41O-07	3	PRAD
TCGA-HC-7738-01A-11R-2118-07	3	PRAD
TCGA-G9-6364-01A-21R-1789-07	3	PRAD
TCGA-EJ-5511-01A-01R-1580-07	3	PRAD
TCGA-HC-8257-01A-11R-2263-07	3	PRAD
TCGA-ZG-A9LM-01A-11R-A41O-07	3	PRAD
TCGA-EJ-AB20-01A-12R-A41O-07	3	PRAD
TCGA-VP-A87C-01A-11R-A352-07	3	PRAD
TCGA-HC-7209-01A-11R-2118-07	3	PRAD
TCGA-J4-A67M-01A-11R-A30B-07	3	PRAD
TCGA-HC-8256-01A-11R-2263-07	3	PRAD
TCGA-KK-A8IB-01A-11R-A36G-07	3	PRAD
TCGA-EJ-8470-01A-11R-2403-07	3	PRAD
TCGA-EJ-A65M-01A-11R-A29R-07	3	PRAD
TCGA-HC-A6AQ-01A-11R-A30B-07	3	PRAD
TCGA-XQ-A8TB-01A-11R-A36G-07	3	PRAD
TCGA-G9-6499-01A-12R-1965-07	3	PRAD
TCGA-V1-A8X3-01A-11R-A37L-07	3	PRAD
TCGA-V1-A8MF-01A-11R-A36G-07	3	PRAD
TCGA-G9-6373-01A-11R-1789-07	3	PRAD
TCGA-ZG-A9LN-01A-11R-A41O-07	3	PRAD
TCGA-J4-AAU2-01A-11R-A41O-07	3	PRAD
TCGA-CH-5744-01A-11R-1580-07	3	PRAD
TCGA-CH-5739-01A-11R-1580-07	3	PRAD
TCGA-EJ-7123-01A-11R-1965-07	3	PRAD
TCGA-2A-A8W3-01A-11R-A37L-07	3	PRAD
TCGA-EJ-A7NF-01A-11R-A33R-07	3	PRAD
TCGA-EJ-7218-01B-11R-A32O-07	3	PRAD
TCGA-EJ-A7NN-01A-11R-A33R-07	3	PRAD
TCGA-YL-A9WY-01A-11R-A41O-07	3	PRAD
TCGA-KK-A7B3-01A-11R-A33R-07	3	PRAD
TCGA-YL-A8SJ-01B-11R-A37L-07	3	PRAD
TCGA-EJ-8472-01A-11R-2403-07	3	PRAD
TCGA-G9-6363-01A-21R-1789-07	3	PRAD
TCGA-EJ-A65G-01A-21R-A29R-07	3	PRAD
TCGA-CH-5740-01A-11R-1580-07	3	PRAD
TCGA-V1-A9ZG-01A-11R-A41O-07	3	PRAD
TCGA-G9-6343-01A-21R-1965-07	3	PRAD
TCGA-HC-8262-01A-11R-2263-07	3	PRAD
TCGA-CH-5790-01A-11R-1580-07	3	PRAD
TCGA-CH-5750-01A-11R-1580-07	3	PRAD
TCGA-EJ-A65F-01A-21R-A311-07	3	PRAD
TCGA-EJ-8468-01A-21R-2403-07	3	PRAD
TCGA-HC-7211-01A-11R-2118-07	3	PRAD
TCGA-EJ-7792-01A-11R-2118-07	3	PRAD
TCGA-EJ-5505-01A-01R-1580-07	3	PRAD
TCGA-H9-7775-01A-11R-2118-07	3	PRAD
TCGA-X4-A8KS-01A-12R-A36G-07	3	PRAD
TCGA-V1-A8WS-01A-11R-A37L-07	3	PRAD
TCGA-G9-A9S7-01A-11R-A41O-07	3	PRAD
TCGA-KK-A7B1-01A-11R-A32O-07	3	PRAD
TCGA-EJ-7784-01A-11R-2118-07	3	PRAD
TCGA-G9-6354-01A-11R-A311-07	3	PRAD
TCGA-ZG-A8QY-01A-11R-A37L-07	3	PRAD
TCGA-EJ-A65E-01A-11R-A29R-07	3	PRAD
TCGA-J4-A67L-01A-11R-A30B-07	3	PRAD
TCGA-J4-A67S-01A-11R-A30B-07	3	PRAD
TCGA-ZG-A9L0-01A-11R-A41O-07	3	PRAD
TCGA-EJ-5502-01A-01R-1580-07	3	PRAD
TCGA-CH-5769-01A-11R-1580-07	3	PRAD
TCGA-KK-A8I8-01A-11R-A36G-07	3	PRAD
TCGA-ZG-A9NI-01A-11R-A41O-07	3	PRAD
TCGA-EJ-7788-01A-11R-2118-07	3	PRAD
TCGA-VN-A88O-01A-11R-A352-07	3	PRAD
TCGA-EJ-A65B-01A-12R-A30B-07	3	PRAD
TCGA-HC-8261-01A-11R-2263-07	3	PRAD
TCGA-HC-7819-01A-11R-2118-07	3	PRAD
TCGA-XJ-A83G-01A-11R-A352-07	3	PRAD
TCGA-ZG-A9MC-01A-31R-A41O-07	3	PRAD
TCGA-KC-A7FA-01A-21R-A33R-07	3	PRAD
TCGA-HC-A6HX-01A-11R-A31N-07	3	PRAD
TCGA-VN-A88N-01A-11R-A36G-07	3	PRAD
TCGA-HC-8259-01A-11R-2263-07	3	PRAD
TCGA-HC-A6AP-01A-11R-A30B-07	3	PRAD
TCGA-VP-A87H-01A-11R-A352-07	3	PRAD
TCGA-EJ-5530-01A-01R-1580-07	3	PRAD
TCGA-EJ-7782-01A-11R-2118-07	3	PRAD
TCGA-KC-A4BV-01A-31R-A26U-07	3	PRAD
TCGA-G9-7521-01A-11R-2263-07	3	PRAD
TCGA-HC-7231-01A-11R-2118-07	3	PRAD
TCGA-2A-A8VV-01A-11R-A37L-07	3	PRAD
TCGA-Y6-A9XI-01A-11R-A41O-07	3	PRAD
TCGA-CH-5791-01A-11R-1580-07	3	PRAD
TCGA-J4-A6G1-01A-11R-A311-07	3	PRAD
TCGA-G9-6496-01A-11R-1789-07	3	PRAD
TCGA-HC-7230-01A-11R-2118-07	3	PRAD
TCGA-VN-A88M-01A-11R-A352-07	3	PRAD
TCGA-FC-7961-01A-11R-A29R-07	3	PRAD
TCGA-VN-A88Q-01A-11R-A352-07	3	PRAD
TCGA-ZG-A9LZ-01A-11R-A41O-07	3	PRAD
TCGA-J4-A67K-01A-21R-A30B-07	3	PRAD
TCGA-YL-A8HJ-01A-11R-A36G-07	3	PRAD
TCGA-YL-A8SQ-01B-11R-A37L-07	3	PRAD
TCGA-YL-A8SF-01A-11R-A37L-07	4	PRAD
TCGA-HC-A6AL-01A-11R-A30B-07	4	PRAD
TCGA-VP-AA1N-01A-31R-A41O-07	4	PRAD
TCGA-G9-7519-01A-11R-2263-07	4	PRAD
TCGA-2A-A8VT-01A-11R-A37L-07	4	PRAD
TCGA-CH-5754-01A-11R-1580-07	4	PRAD
TCGA-J9-A8CP-01A-11R-A352-07	4	PRAD
TCGA-VP-A87D-01A-11R-A352-07	4	PRAD
TCGA-EJ-5507-01A-01R-1580-07	4	PRAD
TCGA-HC-7744-01A-11R-2118-07	4	PRAD
TCGA-V1-A9O9-01A-11R-A41O-07	4	PRAD
TCGA-YL-A8SO-01B-31R-A37L-07	4	PRAD
TCGA-G9-7525-01A-31R-2263-07	4	PRAD
TCGA-VN-A88L-01A-11R-A352-07	4	PRAD
TCGA-J4-A67Q-01A-21R-A30B-07	4	PRAD
TCGA-EJ-5518-01A-01R-1580-07	4	PRAD
TCGA-KK-A8IG-01A-11R-A36G-07	4	PRAD
TCGA-V1-A9OL-01A-11R-A41O-07	4	PRAD
TCGA-CH-5753-01A-11R-1580-07	4	PRAD
TCGA-V1-A9OF-01A-11R-A41O-07	4	PRAD
TCGA-HC-7213-01A-11R-2118-07	4	PRAD
TCGA-KK-A7B0-01A-11R-A32O-07	4	PRAD
TCGA-EJ-5494-01A-01R-1580-07	4	PRAD
TCGA-EJ-5517-01A-01R-1580-07	4	PRAD
TCGA-YL-A8SR-01B-11R-A37L-07	4	PRAD
TCGA-XJ-A83F-01A-11R-A352-07	4	PRAD
TCGA-EJ-5519-01A-01R-1580-07	4	PRAD
TCGA-HC-A6AN-01A-11R-A30B-07	4	PRAD
TCGA-KK-A59Y-01A-11R-A26U-07	4	PRAD
TCGA-J4-A83J-01A-11R-A36G-07	4	PRAD
TCGA-2A-AAYU-01A-11R-A41O-07	4	PRAD
TCGA-CH-5737-01A-11R-1580-07	4	PRAD
TCGA-2A-AAYF-01A-11R-A41O-07	4	PRAD
TCGA-KK-A7B4-01A-11R-A32O-07	4	PRAD
TCGA-HC-7081-01A-11R-1965-07	4	PRAD
TCGA-YL-A8SH-01B-11R-A37L-07	4	PRAD
TCGA-EJ-7312-01B-21R-A32O-07	4	PRAD
TCGA-2A-AAYO-01A-11R-A41O-07	4	PRAD
TCGA-G9-6366-01A-11R-2118-07	4	PRAD
TCGA-EJ-A7NM-01A-21R-A33R-07	4	PRAD
TCGA-J4-A83I-01A-11R-A36G-07	4	PRAD
TCGA-CH-5794-01A-11R-1580-07	4	PRAD
TCGA-XK-AAJA-01A-11R-A41O-07	4	PRAD
TCGA-YL-A8S8-01A-11R-A37L-07	4	PRAD
TCGA-VP-A87K-01A-11R-A352-07	4	PRAD
TCGA-KC-A7FD-01A-11R-A33R-07	4	PRAD
TCGA-V1-A9ZI-01A-11R-A41O-07	4	PRAD
TCGA-HC-A632-01A-11R-A29R-07	4	PRAD
TCGA-KK-A6E0-01A-11R-A311-07	4	PRAD
TCGA-HC-A76X-01A-11R-A33R-07	4	PRAD
TCGA-G9-6379-01A-11R-A31N-07	4	PRAD
TCGA-YL-A8SC-01A-11R-A37L-07	4	PRAD
TCGA-J4-AATZ-01A-11R-A41O-07	4	PRAD
TCGA-V1-A9OT-01A-11R-A41O-07	4	PRAD
TCGA-ZG-A9LB-01A-11R-A41O-07	4	PRAD
TCGA-EJ-7315-01A-31R-2118-07	4	PRAD
TCGA-KK-A59Z-01A-12R-A26U-07	4	PRAD
TCGA-HC-8213-01A-11R-A29R-07	4	PRAD
TCGA-KK-A7AQ-01A-11R-A33R-07	4	PRAD
TCGA-H9-A6BY-01A-11R-A30B-07	4	PRAD
TCGA-V1-A8MM-01A-11R-A37L-07	4	PRAD
TCGA-G9-A9S4-01A-11R-A41O-07	4	PRAD
TCGA-VP-A87B-01A-11R-A352-07	4	PRAD
TCGA-HC-A9TH-01A-11R-A41O-07	4	PRAD
TCGA-CH-5767-01A-11R-1789-07	4	PRAD
TCGA-HC-A8CY-01A-11R-A36G-07	4	PRAD
TCGA-HI-7171-01A-12R-2118-07	4	PRAD
TCGA-G9-6498-01A-12R-A311-07	4	PRAD
TCGA-VP-A876-01A-11R-A352-07	4	PRAD
TCGA-KK-A8I5-01A-11R-A36G-07	4	PRAD
TCGA-EJ-8469-01A-11R-2403-07	4	PRAD
TCGA-G9-6332-01A-11R-1789-07	4	PRAD
TCGA-KK-A7AY-01A-11R-A33R-07	4	PRAD
TCGA-J9-A8CL-01A-11R-A352-07	4	PRAD
TCGA-HC-A9TE-01A-11R-A41O-07	4	PRAD
TCGA-ZG-A9ND-01A-11R-A41O-07	4	PRAD
TCGA-KK-A8IA-01A-11R-A36G-07	4	PRAD
TCGA-CH-5766-01A-11R-1580-07	4	PRAD
TCGA-KK-A6E4-01A-11R-A30B-07	4	PRAD
TCGA-HC-7212-01A-11R-2118-07	4	PRAD
TCGA-VP-A872-01A-11R-A352-07	4	PRAD
TCGA-2A-A8VO-01A-11R-A37L-07	4	PRAD
TCGA-KK-A6E7-01A-11R-A31N-07	4	PRAD
TCGA-V1-A8WW-01A-11R-A37L-07	4	PRAD
TCGA-HC-A4ZV-01A-11R-A26U-07	4	PRAD
TCGA-J4-A67O-01A-11R-A30B-07	4	PRAD
TCGA-HC-7079-01A-11R-1965-07	4	PRAD
TCGA-YL-A9WK-01A-11R-A37L-07	4	PRAD
TCGA-XK-AAJP-01A-11R-A41O-07	4	PRAD
TCGA-J4-A67N-01A-11R-A30B-07	4	PRAD
TCGA-EJ-A8FS-01A-11R-A352-07	4	PRAD
TCGA-HC-7075-01A-11R-1965-07	4	PRAD
TCGA-YL-A8HL-01A-11R-A36G-07	4	PRAD
TCGA-YL-A8SA-01A-21R-A37L-07	4	PRAD
TCGA-CH-5741-01A-11R-1580-07	4	PRAD
TCGA-ZG-A9L2-01A-31R-A41O-07	4	PRAD
TCGA-EJ-5514-01A-01R-1580-07	4	PRAD
TCGA-V1-A8WV-01A-11R-A37L-07	4	PRAD
TCGA-YJ-A8SW-01A-11R-A37L-07	4	PRAD
TCGA-J4-8200-01A-11R-A29R-07	4	PRAD
TCGA-CH-5772-01A-11R-1580-07	4	PRAD
TCGA-V1-A9O5-01A-11R-A41O-07	4	PRAD
TCGA-XK-AAJ3-01A-11R-A41O-07	4	PRAD
TCGA-KK-A5A1-01A-11R-A29R-07	4	PRAD
TCGA-ZG-A8QW-01A-11R-A37L-07	4	PRAD
TCGA-VP-A87J-01A-11R-A352-07	4	PRAD
TCGA-XJ-A9DX-01A-11R-A37L-07	4	PRAD
TCGA-G9-A9S0-01A-11R-A41O-07	4	PRAD
TCGA-EJ-7125-01A-11R-1965-07	4	PRAD
TCGA-XK-AAIV-01A-11R-A41O-07	4	PRAD
TCGA-QU-A6IO-01A-11R-A31N-07	5	PRAD
TCGA-CH-5761-01A-11R-1580-07	5	PRAD
TCGA-XK-AAK1-01A-11R-A41O-07	5	PRAD
TCGA-J4-A6M7-01A-11R-A31N-07	5	PRAD
TCGA-V1-A9OQ-01A-11R-A41O-07	5	PRAD
TCGA-VN-A88R-01A-11R-A36G-07	5	PRAD
TCGA-KK-A7AZ-01A-12R-A32O-07	5	PRAD
TCGA-MG-AAMC-01A-11R-A41O-07	5	PRAD
TCGA-KK-A59X-01A-11R-A29R-07	5	PRAD
TCGA-HC-7752-01A-11R-2118-07	5	PRAD
TCGA-VN-A88K-01A-11R-A352-07	5	PRAD
TCGA-EJ-7325-01B-11R-A32O-07	5	PRAD
TCGA-V1-A9O7-01A-21R-A41O-07	5	PRAD
TCGA-KK-A6E2-01A-11R-A311-07	5	PRAD
TCGA-HC-A631-01A-11R-A29R-07	5	PRAD
TCGA-ZG-A9M4-01A-11R-A41O-07	5	PRAD
TCGA-WW-A8ZI-01A-11R-A37L-07	5	PRAD
TCGA-HC-7077-01A-11R-1965-07	5	PRAD
TCGA-KK-A6E1-01A-11R-A311-07	5	PRAD
TCGA-M7-A725-01A-12R-A32O-07	5	PRAD
TCGA-VN-A88P-01A-11R-A352-07	5	PRAD
TCGA-HC-7821-01A-12R-2118-07	5	PRAD
TCGA-J9-A52B-01A-11R-A26U-07	5	PRAD
TCGA-4L-AA1F-01A-11R-A41O-07	5	PRAD
TCGA-QU-A6IM-01A-11R-A31N-07	5	PRAD
TCGA-ZG-A9L9-01A-11R-A41O-07	5	PRAD
TCGA-G9-6347-01A-11R-A31N-07	5	PRAD
TCGA-KK-A8ID-01A-11R-A36G-07	5	PRAD
TCGA-HC-A6AO-01A-11R-A30B-07	5	PRAD
TCGA-EJ-A46G-01A-31R-A26U-07	5	PRAD
TCGA-TP-A8TV-01A-11R-A41O-07	5	PRAD
TCGA-G9-6362-01A-11R-1789-07	5	PRAD
TCGA-YL-A8SL-01B-21R-A37L-07	5	PRAD
TCGA-KK-A8II-01A-11R-A36G-07	5	PRAD
TCGA-J9-A8CN-01A-11R-A352-07	5	PRAD
TCGA-KK-A7AP-01A-12R-A33R-07	5	PRAD
TCGA-EJ-A65J-01A-11R-A311-07	5	PRAD
TCGA-G9-7523-01A-11R-2263-07	5	PRAD
TCGA-V1-A9Z7-01A-11R-A41O-07	5	PRAD
TCGA-KK-A6E8-01A-11R-A31N-07	5	PRAD
TCGA-HC-7080-01A-11R-1965-07	5	PRAD
TCGA-G9-6369-01A-21R-1965-07	5	PRAD
TCGA-EJ-A8FN-01A-11R-A352-07	5	PRAD
TCGA-FC-A6HD-01A-11R-A31N-07	5	PRAD
TCGA-YL-A9WH-01A-11R-A37L-07	5	PRAD
TCGA-KK-A59V-01A-11R-A29R-07	5	PRAD
TCGA-EJ-5525-01A-01R-1580-07	5	PRAD
TCGA-KK-A8IH-01A-11R-A36G-07	5	PRAD
TCGA-HI-7169-01A-11R-2118-07	5	PRAD
TCGA-M7-A71Z-01A-12R-A32O-07	5	PRAD
TCGA-QU-A6IL-01A-11R-A31N-07	5	PRAD
TCGA-HC-A48F-01A-11R-A250-07	5	PRAD
TCGA-2A-A8VX-01A-11R-A37L-07	5	PRAD
TCGA-VP-A875-01A-31R-A352-07	6	PRAD
TCGA-KK-A7AU-01A-11R-A32O-07	6	PRAD
TCGA-KC-A7F5-01A-11R-A33R-07	6	PRAD
TCGA-YL-A9WL-01A-11R-A41O-07	6	PRAD
TCGA-ZG-A9N3-01A-11R-A41O-07	6	PRAD
TCGA-KK-A7AW-01A-11R-A32O-07	6	PRAD
TCGA-YL-A9WI-01A-11R-A37L-07	6	PRAD
TCGA-QU-A6IN-01A-11R-A31N-07	6	PRAD
TCGA-VP-A87E-01A-31R-A352-07	6	PRAD
TCGA-EJ-A46F-01A-31R-A250-07	6	PRAD
TCGA-CH-5751-01A-11R-1580-07	6	PRAD
TCGA-FC-A5OB-01A-11R-A29R-07	6	PRAD
TCGA-CH-5752-01A-11R-1580-07	6	PRAD
TCGA-ZG-A9L1-01A-11R-A41O-07	6	PRAD
TCGA-ZG-A9KY-01A-11R-A41O-07	6	PRAD
TCGA-CH-5788-01A-11R-1580-07	6	PRAD
TCGA-ZG-A9L5-01A-12R-A41O-07	6	PRAD
TCGA-YL-A8HM-01A-11R-A36G-07	6	PRAD
TCGA-KK-A8IK-01A-11R-A36G-07	6	PRAD
TCGA-2A-A8W1-01A-11R-A37L-07	6	PRAD
TCGA-M7-A722-01A-12R-A36G-07	6	PRAD
TCGA-KK-A8IF-01A-11R-A36G-07	6	PRAD
TCGA-YL-A8SP-01B-11R-A37L-07	6	PRAD
TCGA-EJ-7789-01A-11R-2118-07	6	PRAD
TCGA-ZG-A8QX-01A-11R-A37L-07	6	PRAD
TCGA-YL-A8S9-01A-11R-A37L-07	7	PRAD
TCGA-J9-A52E-01A-11R-A26U-07	7	PRAD
TCGA-EJ-A65D-01A-11R-A30B-07	7	PRAD
TCGA-J9-A52D-01A-11R-A29R-07	7	PRAD
TCGA-V1-A9O5-06A-11R-A41O-07	7	PRAD
TCGA-XK-AAIW-01A-11R-A41O-07	7	PRAD
TCGA-VN-A943-01A-11R-A41O-07	8	PRAD
TCGA-G9-6338-01A-12R-1965-07	8	PRAD
TCGA-XQ-A8TA-01A-11R-A36G-07	9	PRAD
TCGA-M7-A724-01A-12R-A32O-07	9	PRAD
TCGA-FC-A4JI-01A-11R-A250-07	10	PRAD
TCGA-HC-8264-01B-11R-2403-07	14	PRAD
TCGA-E8-A416-01A-11R-A23N-07	1	THCA
TCGA-BJ-A0ZG-01A-11R-A10U-07	2	THCA
TCGA-EM-A1YD-01A-11R-A14Y-07	2	THCA
TCGA-EM-A1CW-01A-21R-A13Y-07	2	THCA
TCGA-EM-A3FL-01A-11R-A21D-07	2	THCA
TCGA-DJ-A3UT-01A-11R-A22L-07	2	THCA
TCGA-BJ-A45G-01A-11R-A23W-07	2	THCA
TCGA-ET-A3DS-01A-11R-A19O-07	2	THCA
TCGA-DJ-A4V0-01A-11R-A250-07	2	THCA
TCGA-BJ-A28T-01A-11R-A16R-07	3	THCA
TCGA-DJ-A3UZ-01A-11R-A22U-07	3	THCA
TCGA-DJ-A3UX-01A-11R-A22L-07	3	THCA
TCGA-FY-A3R9-01A-11R-A220-07	3	THCA
TCGA-BJ-A3PT-01A-12R-A220-07	3	THCA
TCGA-DJ-A2Q2-01A-11R-A19O-07	3	THCA
TCGA-BJ-A18Y-01A-11R-A13Y-07	3	THCA
TCGA-DJ-A3US-01A-11R-A22L-07	3	THCA
TCGA-E8-A434-01A-11R-A23N-07	3	THCA
TCGA-J8-A3YD-01A-11R-A22U-07	3	THCA
TCGA-EM-A3AR-01A-12R-A20F-07	3	THCA
TCGA-BJ-A0ZJ-01A-11R-A10U-07	3	THCA
TCGA-EM-A22N-01A-11R-A180-07	3	THCA
TCGA-BJ-A2N7-01A-11R-A18C-07	3	THCA
TCGA-EM-A3FR-01A-11R-A220-07	3	THCA
TCGA-EL-A3CO-01A-11R-A19O-07	3	THCA
TCGA-EL-A3T0-01A-22R-A22L-07	3	THCA
TCGA-ET-A4KQ-01A-12R-A250-07	3	THCA
TCGA-EL-A4K2-01A-11R-A250-07	3	THCA
TCGA-E8-A415-01A-11R-A23N-07	3	THCA
TCGA-DJ-A3V4-01A-11R-A22U-07	3	THCA
TCGA-EM-A2OW-01A-11R-A206-07	3	THCA
TCGA-E3-A3DZ-01A-11R-A20F-07	3	THCA
TCGA-EL-A3H2-01A-11R-A20F-07	3	THCA
TCGA-FY-A3R7-01A-11R-A220-07	3	THCA
TCGA-DJ-A3UY-01A-21R-A22L-07	3	THCA
TCGA-EM-A1YE-01A-11R-A14Y-07	3	THCA
TCGA-ET-A40R-01A-11R-A23N-07	3	THCA
TCGA-FY-A3NM-01A-11R-A21D-07	3	THCA
TCGA-FY-A3I5-01B-11R-A220-07	3	THCA
TCGA-EM-A3FP-01A-11R-A21D-07	3	THCA
TCGA-DJ-A3VG-01A-11R-A23N-07	3	THCA
TCGA-CE-A27D-01A-11R-A16R-07	3	THCA
TCGA-DJ-A4UP-01A-11R-A250-07	3	THCA
TCGA-FY-A40N-01A-11R-A23N-07	3	THCA
TCGA-EM-A1YA-01A-11R-A14Y-07	3	THCA
TCGA-EM-A3O6-01A-11R-A220-07	3	THCA
TCGA-KS-A4ID-01A-11R-A250-07	3	THCA
TCGA-BJ-A190-01A-11R-A13Y-07	3	THCA
TCGA-EM-A4FV-01A-11R-A250-07	3	THCA
TCGA-FY-A3R6-01A-11R-A220-07	3	THCA
TCGA-FY-A3TY-01A-11R-A22U-07	3	THCA
TCGA-DJ-A1QM-01A-11R-A14Y-07	3	THCA
TCGA-EL-A3ZN-01A-11R-A23N-07	3	THCA
TCGA-MK-A84Z-01A-11R-A39I-07	3	THCA
TCGA-EL-A3GQ-01A-11R-A206-07	3	THCA
TCGA-BJ-A45F-01A-12R-A23W-07	3	THCA
TCGA-ET-A39S-01A-11R-A19O-07	4	THCA
TCGA-DJ-A2PX-01A-11R-A18C-07	4	THCA
TCGA-DJ-A1QL-01A-11R-A14Y-07	4	THCA
TCGA-EL-A3TA-01A-12R-A22L-07	4	THCA
TCGA-EM-A2CQ-01A-11R-A180-07	4	THCA
TCGA-BJ-A0ZC-01A-12R-A13Y-07	4	THCA
TCGA-EM-A2CT-01A-11R-A180-07	4	THCA
TCGA-DJ-A3VL-01A-11R-A23N-07	4	THCA
TCGA-ET-A39I-01A-11R-A19O-07	4	THCA
TCGA-EL-A3T2-01A-11R-A22L-07	4	THCA
TCGA-E8-A413-01A-21R-A23N-07	4	THCA
TCGA-DE-A2OL-01A-11R-A18C-07	4	THCA
TCGA-BJ-A2N9-01A-11R-A18C-07	4	THCA
TCGA-EL-A3ZH-01A-31R-A23N-07	4	THCA
TCGA-EL-A3H1-01A-11R-A21D-07	4	THCA
TCGA-EM-A4FO-01A-11R-A250-07	4	THCA
TCGA-EL-A3ZS-01A-12R-A23N-07	4	THCA
TCGA-EM-A4FH-01A-11R-A250-07	4	THCA
TCGA-DJ-A2PV-01A-11R-A19O-07	4	THCA
TCGA-DJ-A4V4-01A-11R-A250-07	4	THCA
TCGA-EM-A3AL-01A-11R-A206-07	4	THCA
TCGA-EM-A2CK-01A-11R-A180-07	4	THCA
TCGA-EM-A3FN-01A-11R-A21D-07	4	THCA
TCGA-FY-A3NP-01A-11R-A21D-07	4	THCA
TCGA-E8-A437-01A-12R-A23W-07	4	THCA
TCGA-EM-A2CJ-01A-11R-A180-07	4	THCA
TCGA-EM-A22L-01A-11R-A180-07	4	THCA
TCGA-DJ-A3VM-01A-11R-A23N-07	4	THCA
TCGA-EM-A2OV-01A-11R-A206-07	4	THCA
TCGA-BJ-A0ZA-01A-11R-A10U-07	4	THCA
TCGA-FK-A3SD-01A-11R-A22L-07	4	THCA
TCGA-DJ-A2PS-01A-11R-A18C-07	4	THCA
TCGA-ET-A25I-01A-11R-A16R-07	4	THCA
TCGA-EM-A2P0-01A-11R-A206-07	4	THCA
TCGA-EL-A4JW-01A-11R-A250-07	4	THCA
TCGA-ET-A3DR-01A-11R-A19O-07	4	THCA
TCGA-E8-A414-01A-11R-A23N-07	4	THCA
TCGA-EL-A3CW-01A-11R-A19O-07	4	THCA
TCGA-J8-A4HY-01A-11R-A250-07	4	THCA
TCGA-ET-A40P-01A-11R-A23N-07	4	THCA
TCGA-EL-A3CZ-01A-11R-A19O-07	4	THCA
TCGA-DJ-A3V3-01A-11R-A22U-07	4	THCA
TCGA-DJ-A4UW-01A-11R-A250-07	4	THCA
TCGA-BJ-A45C-01A-11R-A23W-07	4	THCA
TCGA-EM-A3AI-01A-11R-A206-07	4	THCA
TCGA-DJ-A13O-01A-11R-A10U-07	4	THCA
TCGA-EM-A3O8-01A-11R-A220-07	4	THCA
TCGA-FY-A3WA-01A-11R-A22L-07	4	THCA
TCGA-E8-A436-01A-12R-A23W-07	4	THCA
TCGA-DJ-A3UU-01A-11R-A22L-07	4	THCA
TCGA-BJ-A45H-01A-12R-A23W-07	4	THCA
TCGA-EM-A2CP-01A-11R-A180-07	4	THCA
TCGA-DJ-A3VK-01A-11R-A23N-07	4	THCA
TCGA-QD-A8IV-01A-11R-A39I-07	4	THCA
TCGA-DJ-A4UQ-01A-11R-A250-07	4	THCA
TCGA-BJ-A28X-01A-11R-A22L-07	4	THCA
TCGA-E3-A3E1-01A-11R-A20F-07	4	THCA
TCGA-EL-A3D4-01A-11R-A19O-07	4	THCA
TCGA-BJ-A2P4-01A-11R-A18C-07	4	THCA
TCGA-CE-A481-01A-21R-A23W-07	4	THCA
TCGA-EL-A4JV-01A-11R-A250-07	4	THCA
TCGA-DE-A4M8-01A-21R-A250-07	4	THCA
TCGA-EM-A22K-01A-11R-A180-07	4	THCA
TCGA-BJ-A3F0-01A-11R-A206-07	4	THCA
TCGA-BJ-A45K-01A-11R-A23W-07	4	THCA
TCGA-FY-A3I4-01A-11R-A21D-07	4	THCA
TCGA-DJ-A2QB-01A-11R-A19O-07	4	THCA
TCGA-J8-A3O2-01A-11R-A23N-07	4	THCA
TCGA-EL-A3TB-01A-11R-A22L-07	4	THCA
TCGA-BJ-A2N8-01A-11R-A18C-07	4	THCA
TCGA-ET-A25P-01A-11R-A16R-07	4	THCA
TCGA-BJ-A0Z3-01A-11R-A13Y-07	4	THCA
TCGA-DJ-A2Q7-01A-11R-A18C-07	4	THCA
TCGA-DJ-A13X-01A-11R-A10U-07	4	THCA
TCGA-EM-A4FU-01A-11R-A250-07	4	THCA
TCGA-DJ-A2Q3-01A-11R-A18C-07	4	THCA
TCGA-J8-A42S-01A-11R-A23N-07	4	THCA
TCGA-DJ-A4UT-01A-11R-A250-07	4	THCA
TCGA-EM-A2CL-01A-11R-A180-07	4	THCA
TCGA-DJ-A3V9-01A-11R-A23N-07	4	THCA
TCGA-ET-A2N5-01A-11R-A18C-07	4	THCA
TCGA-E3-A3E0-01A-11R-A20F-07	4	THCA
TCGA-BJ-A28V-01A-11R-A19O-07	4	THCA
TCGA-EL-A3GW-01A-11R-A206-07	4	THCA
TCGA-EM-A2CO-01A-11R-A19O-07	4	THCA
TCGA-E8-A44M-01A-21R-A23W-07	4	THCA
TCGA-E8-A2EA-01A-11R-A180-07	4	THCA
TCGA-ET-A39L-01A-12R-A19O-07	4	THCA
TCGA-EL-A3D5-01A-22R-A206-07	4	THCA
TCGA-DJ-A2PZ-01A-21R-A18C-07	4	THCA
TCGA-BJ-A3PR-01A-11R-A220-07	4	THCA
TCGA-DJ-A3VD-01A-11R-A23N-07	4	THCA
TCGA-DJ-A3UW-01A-11R-A22L-07	4	THCA
TCGA-KS-A4IC-01A-11R-A250-07	4	THCA
TCGA-DJ-A1QD-01A-11R-A14Y-07	4	THCA
TCGA-ET-A40T-01A-11R-A23N-07	4	THCA
TCGA-FE-A237-01A-11R-A16R-07	4	THCA
TCGA-EM-A4G1-01A-11R-A250-07	4	THCA
TCGA-DJ-A3UN-01A-11R-A22L-07	4	THCA
TCGA-EL-A3GO-01A-11R-A206-07	4	THCA
TCGA-J8-A3O0-01A-11R-A21D-07	4	THCA
TCGA-ET-A3DQ-01A-11R-A19O-07	4	THCA
TCGA-KS-A41I-01A-11R-A23N-07	4	THCA
TCGA-EM-A3FJ-01A-11R-A21D-07	4	THCA
TCGA-EM-A2CU-01A-12R-A180-07	4	THCA
TCGA-FK-A3SE-01A-11R-A22L-07	4	THCA
TCGA-FY-A40K-01A-11R-A23N-07	4	THCA
TCGA-BJ-A0Z0-01A-11R-A10U-07	4	THCA
TCGA-EL-A4KD-01A-11R-A250-07	4	THCA
TCGA-EM-A3AJ-01A-11R-A206-07	4	THCA
TCGA-EM-A1YC-01A-11R-A14Y-07	4	THCA
TCGA-BJ-A45D-01A-11R-A23W-07	4	THCA
TCGA-EM-A3AP-01A-12R-A20F-07	4	THCA
TCGA-DJ-A2PN-01A-21R-A19O-07	4	THCA
TCGA-EM-A3AK-01A-11R-A206-07	4	THCA
TCGA-DJ-A4UR-01A-11R-A250-07	4	THCA
TCGA-BJ-A28W-01A-11R-A32Y-07	4	THCA
TCGA-DJ-A13W-01A-11R-A10U-07	4	THCA
TCGA-DJ-A3UR-01A-11R-A22L-07	4	THCA
TCGA-EL-A3GV-01A-11R-A21D-07	4	THCA
TCGA-EM-A2CS-01A-11R-A180-07	5	THCA
TCGA-BJ-A28S-01A-11R-A19O-07	5	THCA
TCGA-ET-A3DP-01A-11R-A21D-07	5	THCA
TCGA-FY-A76V-01A-11R-A39I-07	5	THCA
TCGA-BJ-A45E-01A-11R-A32Y-07	5	THCA
TCGA-DJ-A3V5-01A-11R-A22U-07	5	THCA
TCGA-FY-A2QD-01A-11R-A19O-07	5	THCA
TCGA-ET-A3BQ-01B-11R-A206-07	5	THCA
TCGA-ET-A39R-01A-11R-A19O-07	5	THCA
TCGA-DJ-A3V2-01A-11R-A22U-07	5	THCA
TCGA-EL-A3GR-01A-21R-A206-07	5	THCA
TCGA-CE-A485-01A-11R-A23W-07	5	THCA
TCGA-DJ-A3UK-01A-11R-A22L-07	5	THCA
TCGA-IM-A41Z-01A-11R-A23N-07	5	THCA
TCGA-DE-A4M9-01A-11R-A250-07	5	THCA
TCGA-DJ-A3V8-01A-11R-A23N-07	5	THCA
TCGA-CE-A3MD-01A-11R-A20F-07	5	THCA
TCGA-DJ-A1QG-01A-11R-A14Y-07	5	THCA
TCGA-ET-A3DV-01A-12R-A206-07	5	THCA
TCGA-BJ-A2NA-01A-12R-A19O-07	5	THCA
TCGA-DJ-A3UQ-01A-11R-A22L-07	5	THCA
TCGA-ET-A2N3-01B-21R-A23N-07	5	THCA
TCGA-EM-A3AN-01A-11R-A206-07	5	THCA
TCGA-EL-A3ZR-01A-11R-A23N-07	5	THCA
TCGA-KS-A4I3-01A-11R-A250-07	5	THCA
TCGA-FK-A3S3-01A-11R-A22L-07	5	THCA
TCGA-FE-A232-01A-11R-A14Y-07	5	THCA
TCGA-EM-A2P3-01A-11R-A206-07	5	THCA
TCGA-DJ-A13U-01A-11R-A10U-07	5	THCA
TCGA-DJ-A2PO-01A-21R-A19O-07	5	THCA
TCGA-DO-A1K0-01A-11R-A13Y-07	5	THCA
TCGA-EM-A1CS-01A-11R-A13Y-07	5	THCA
TCGA-FY-A4B0-01A-21R-A23W-07	5	THCA
TCGA-EL-A3ZG-01A-11R-A23N-07	5	THCA
TCGA-E8-A433-01A-11R-A23N-07	5	THCA
TCGA-ET-A39J-01A-11R-A19O-07	5	THCA
TCGA-EM-A2CS-06A-11R-A180-07	5	THCA
TCGA-DJ-A2Q6-01A-11R-A18C-07	5	THCA
TCGA-DJ-A13M-01A-11R-A10U-07	5	THCA
TCGA-DJ-A3V0-01A-11R-A22U-07	5	THCA
TCGA-J8-A4HW-06A-11R-A250-07	5	THCA
TCGA-FE-A239-01A-11R-A16R-07	5	THCA
TCGA-BJ-A0Z2-01A-11R-A10U-07	5	THCA
TCGA-ET-A3DT-01A-11R-A19O-07	5	THCA
TCGA-BJ-A0YZ-01A-11R-A10U-07	5	THCA
TCGA-E3-A3E2-01A-11R-A20F-07	5	THCA
TCGA-EM-A3OA-01A-11R-A220-07	5	THCA
TCGA-E3-A3E3-01A-11R-A20F-07	5	THCA
TCGA-J8-A4HW-01A-11R-A250-07	5	THCA
TCGA-H2-A3RH-01A-11R-A220-07	5	THCA
TCGA-FY-A40L-01A-11R-A23N-07	5	THCA
TCGA-FY-A3RA-01A-11R-A220-07	5	THCA
TCGA-E8-A44K-01A-21R-A23W-07	5	THCA
TCGA-DJ-A2PP-01A-11R-A19O-07	5	THCA
TCGA-BJ-A28Z-01A-11R-A16R-07	5	THCA
TCGA-EM-A2P1-01A-11R-A206-07	5	THCA
TCGA-J8-A3YG-01A-11R-A22U-07	5	THCA
TCGA-H2-A421-01A-11R-A23N-07	5	THCA
TCGA-FK-A3SB-01A-11R-A22L-07	5	THCA
TCGA-IM-A4EB-01A-11R-A250-07	5	THCA
TCGA-FE-A236-01A-11R-A16R-07	5	THCA
TCGA-EL-A3T8-01A-21R-A22L-07	5	THCA
TCGA-EM-A3SX-01A-11R-A22U-07	5	THCA
TCGA-EL-A3CM-01A-11R-A19O-07	5	THCA
TCGA-DJ-A3UP-01A-11R-A22L-07	5	THCA
TCGA-EL-A3CU-01A-11R-A19O-07	5	THCA
TCGA-ET-A3BN-01A-11R-A19O-07	5	THCA
TCGA-CE-A484-01A-11R-A23W-07	5	THCA
TCGA-IM-A420-01A-11R-A23N-07	5	THCA
TCGA-EM-A3OB-01A-11R-A220-07	5	THCA
TCGA-ET-A3BU-01A-11R-A19O-07	5	THCA
TCGA-EL-A3MW-01A-11R-A20F-07	5	THCA
TCGA-DJ-A2QA-01A-11R-A18C-07	5	THCA
TCGA-EM-A4FF-01A-11R-A250-07	5	THCA
TCGA-BJ-A28R-01A-11R-A16R-07	5	THCA
TCGA-DJ-A3UM-01A-11R-A22L-07	5	THCA
TCGA-ET-A39P-01A-21R-A19O-07	5	THCA
TCGA-EL-A3CS-01A-21R-A19O-07	5	THCA
TCGA-DJ-A1QQ-01A-11R-A14Y-07	5	THCA
TCGA-EL-A3ZL-01A-11R-A23N-07	5	THCA
TCGA-FE-A3PC-01A-11R-A220-07	5	THCA
TCGA-EM-A2OZ-01A-11R-A206-07	5	THCA
TCGA-ET-A39T-01A-11R-A19O-07	5	THCA
TCGA-FY-A3W9-01A-11R-A22L-07	5	THCA
TCGA-DJ-A3VA-01A-11R-A23N-07	5	THCA
TCGA-ET-A25K-01A-11R-A16R-07	5	THCA
TCGA-FE-A3PD-01A-11R-A220-07	5	THCA
TCGA-FY-A4B4-01A-11R-A23W-07	5	THCA
TCGA-ET-A2N0-01A-11R-A18C-07	5	THCA
TCGA-EL-A3CV-01A-11R-A19O-07	5	THCA
TCGA-CE-A3ME-01A-11R-A20F-07	5	THCA
TCGA-E3-A3DY-01A-11R-A20F-07	5	THCA
TCGA-E8-A438-01A-11R-A23W-07	5	THCA
TCGA-DJ-A4V2-01A-11R-A250-07	5	THCA
TCGA-H2-A3RI-01A-11R-A220-07	5	THCA
TCGA-FE-A233-01A-11R-A14Y-07	5	THCA
TCGA-EM-A22P-01A-11R-A19O-07	5	THCA
TCGA-DE-A3KN-01A-11R-A20F-07	5	THCA
TCGA-DE-A0XZ-01A-11R-A180-07	5	THCA
TCGA-FK-A4UB-01A-11R-A250-07	5	THCA
TCGA-DJ-A1QF-01A-12R-A14Y-07	5	THCA
TCGA-EL-A3CY-01A-11R-A19O-07	5	THCA
TCGA-FK-A3SG-01A-11R-A22L-07	5	THCA
TCGA-E3-A3E5-01A-11R-A20F-07	5	THCA
TCGA-FY-A3NN-01A-11R-A21D-07	5	THCA
TCGA-EL-A3N3-01A-11R-A20F-07	5	THCA
TCGA-DJ-A13R-01A-11R-A10U-07	5	THCA
TCGA-FE-A3PB-01A-11R-A220-07	5	THCA
TCGA-DJ-A3VJ-01A-11R-A23N-07	5	THCA
TCGA-DJ-A2PU-01A-12R-A19O-07	5	THCA
TCGA-EM-A3AQ-01A-11R-A20F-07	5	THCA
TCGA-EM-A1CT-01A-11R-A13Y-07	5	THCA
TCGA-EM-A2CN-01A-11R-A19O-07	5	THCA
TCGA-EM-A3AO-01A-11R-A206-07	5	THCA
TCGA-IM-A3ED-01A-11R-A206-07	5	THCA
TCGA-BJ-A0ZH-01A-11R-A10U-07	5	THCA
TCGA-DJ-A3VI-01A-11R-A23N-07	5	THCA
TCGA-EM-A22J-01A-11R-A180-07	5	THCA
TCGA-ET-A25N-01A-11R-A16R-07	5	THCA
TCGA-ET-A25M-01A-11R-A16R-07	5	THCA
TCGA-CE-A483-01A-11R-A23W-07	5	THCA
TCGA-EM-A4FR-01A-11R-A250-07	5	THCA
TCGA-ET-A25J-01A-11R-A16R-07	5	THCA
TCGA-ET-A3BT-01A-11R-A19O-07	5	THCA
TCGA-FY-A3ON-01A-11R-A220-07	5	THCA
TCGA-DJ-A13L-01A-11R-A220-07	5	THCA
TCGA-DJ-A2Q5-01A-11R-A18C-07	5	THCA
TCGA-EL-A3ZT-01A-12R-A23N-07	5	THCA
TCGA-EL-A3H8-01A-11R-A20F-07	5	THCA
TCGA-EM-A22I-01A-11R-A180-07	5	THCA
TCGA-DJ-A13S-01A-11R-A10U-07	5	THCA
TCGA-BJ-A192-01A-31R-A13Y-07	5	THCA
TCGA-IM-A3U3-01A-11R-A22L-07	5	THCA
TCGA-EL-A3GY-01A-21R-A206-07	5	THCA
TCGA-DJ-A1QE-01A-21R-A14Y-07	5	THCA
TCGA-EL-A3GU-01A-11R-A21D-07	5	THCA
TCGA-ET-A3DO-01A-11R-A19O-07	5	THCA
TCGA-EL-A3GS-01A-11R-A20F-07	5	THCA
TCGA-EM-A2P2-01A-11R-A206-07	5	THCA
TCGA-EM-A3FQ-06A-11R-A21D-07	5	THCA
TCGA-ET-A3BP-01A-21R-A19O-07	5	THCA
TCGA-FE-A23A-01A-11R-A16R-07	5	THCA
TCGA-H2-A422-01A-11R-A23N-07	5	THCA
TCGA-EL-A3ZP-01A-11R-A23N-07	5	THCA
TCGA-ET-A3DU-01A-11R-A19O-07	5	THCA
TCGA-FE-A238-01A-11R-A16R-07	5	THCA
TCGA-EL-A4K9-01A-11R-A250-07	5	THCA
TCGA-DJ-A2PY-01A-11R-A18C-07	5	THCA
TCGA-DJ-A3VE-01A-11R-A23N-07	5	THCA
TCGA-DJ-A2QC-01A-11R-A18C-07	5	THCA
TCGA-E8-A3X7-01A-11R-A22U-07	5	THCA
TCGA-DE-A0Y2-01A-11R-A10U-07	5	THCA
TCGA-FE-A230-01A-11R-A14Y-07	5	THCA
TCGA-DE-A69K-01A-11R-A39I-07	5	THCA
TCGA-EL-A3T3-01A-11R-A22L-07	5	THCA
TCGA-J8-A3YE-01A-12R-A23N-07	5	THCA
TCGA-J8-A3NZ-01A-11R-A21D-07	5	THCA
TCGA-ET-A3BO-01A-11R-A19O-07	5	THCA
TCGA-EM-A2OY-01A-11R-A206-07	5	THCA
TCGA-J8-A3YH-01A-11R-A22U-07	5	THCA
TCGA-KS-A41L-01A-11R-A23N-07	5	THCA
TCGA-E8-A2JQ-01A-11R-A180-07	5	THCA
TCGA-EL-A3ZK-01A-21R-A23N-07	5	THCA
TCGA-DJ-A2Q4-01A-21R-A18C-07	5	THCA
TCGA-DJ-A1QO-01A-11R-A14Y-07	5	THCA
TCGA-CE-A13K-01A-11R-A10U-07	5	THCA
TCGA-FY-A3YR-01A-11R-A22U-07	5	THCA
TCGA-DJ-A3V7-01A-11R-A23N-07	5	THCA
TCGA-EL-A3CN-01A-12R-A20F-07	5	THCA
TCGA-EL-A4K1-01A-11R-A250-07	5	THCA
TCGA-KS-A4I9-01A-11R-A250-07	6	THCA
TCGA-DJ-A13T-01A-11R-A10U-07	6	THCA
TCGA-EL-A3D0-01A-12R-A206-07	6	THCA
TCGA-J8-A3YH-06A-11R-A23N-07	6	THCA
TCGA-EM-A4FK-01A-11R-A250-07	6	THCA
TCGA-EL-A4KH-01A-11R-A250-07	6	THCA
TCGA-BJ-A18Z-01A-21R-A13Y-07	6	THCA
TCGA-ET-A2MZ-01A-12R-A19O-07	6	THCA
TCGA-EL-A4K0-01A-11R-A250-07	6	THCA
TCGA-BJ-A45I-01A-11R-A23W-07	6	THCA
TCGA-DJ-A13V-01A-11R-A10U-07	6	THCA
TCGA-EL-A3N2-01A-11R-A20F-07	6	THCA
TCGA-EL-A3CL-01A-11R-A19O-07	6	THCA
TCGA-BJ-A291-01A-11R-A16R-07	6	THCA
TCGA-EM-A3FQ-01A-11R-A21D-07	6	THCA
TCGA-BJ-A0ZE-01A-11R-A10U-07	6	THCA
TCGA-EL-A3H4-01A-11R-A206-07	6	THCA
TCGA-EL-A3CR-01A-12R-A206-07	6	THCA
TCGA-BJ-A0ZB-01A-11R-A10U-07	6	THCA
TCGA-IM-A3EB-01A-11R-A206-07	6	THCA
TCGA-EL-A3CP-01A-11R-A19O-07	6	THCA
TCGA-DJ-A4UL-01A-11R-A250-07	6	THCA
TCGA-EL-A4JZ-01A-11R-A250-07	6	THCA
TCGA-EM-A1CV-01A-11R-A13Y-07	6	THCA
TCGA-EL-A3GZ-01A-11R-A20F-07	6	THCA
TCGA-IM-A41Y-01A-11R-A23W-07	6	THCA
TCGA-L6-A4EU-01A-11R-A250-07	6	THCA
TCGA-E8-A432-01A-11R-A23N-07	6	THCA
TCGA-DJ-A2PQ-01A-11R-A18C-07	6	THCA
TCGA-EL-A3T6-01A-11R-A220-07	6	THCA
TCGA-ET-A40Q-01A-11R-A23N-07	6	THCA
TCGA-BJ-A3EZ-01A-11R-A206-07	6	THCA
TCGA-KS-A4I5-01A-11R-A250-07	6	THCA
TCGA-E8-A242-01A-21R-A16R-07	6	THCA
TCGA-EM-A3SZ-01A-11R-A22U-07	6	THCA
TCGA-ET-A39N-01A-11R-A19O-07	6	THCA
TCGA-EM-A1CU-01A-11R-A13Y-07	6	THCA
TCGA-EM-A3O7-01A-11R-A220-07	6	THCA
TCGA-ET-A2N4-01A-12R-A19O-07	6	THCA
TCGA-J8-A3YF-01A-12R-A23N-07	6	THCA
TCGA-FY-A3R8-01A-11R-A220-07	6	THCA
TCGA-EM-A3SU-06A-11R-A22U-07	6	THCA
TCGA-EM-A4FQ-01A-11R-A250-07	6	THCA
TCGA-DE-A7U5-01A-11R-A39I-07	6	THCA
TCGA-EM-A4FN-01A-11R-A250-07	6	THCA
TCGA-FE-A3PA-01A-12R-A220-07	6	THCA
TCGA-E8-A419-01A-11R-A23N-07	6	THCA
TCGA-ET-A3BS-01A-11R-A206-07	6	THCA
TCGA-DJ-A1QN-01A-11R-A14Y-07	6	THCA
TCGA-FE-A235-01A-11R-A16R-07	6	THCA
TCGA-KS-A41J-01A-11R-A23N-07	6	THCA
TCGA-E8-A417-01A-21R-A23N-07	6	THCA
TCGA-DJ-A2Q0-01A-11R-A206-07	6	THCA
TCGA-DJ-A4V5-01A-11R-A250-07	6	THCA
TCGA-EL-A3CT-01A-12R-A206-07	6	THCA
TCGA-ET-A25R-01A-11R-A16R-07	6	THCA
TCGA-DJ-A1QI-01A-11R-A14Y-07	6	THCA
TCGA-DJ-A1QH-01A-21R-A14Y-07	6	THCA
TCGA-EL-A3H7-01A-11R-A21D-07	6	THCA
TCGA-EM-A3SU-01A-11R-A22U-07	6	THCA
TCGA-DJ-A13P-01A-11R-A10U-07	6	THCA
TCGA-FY-A3BL-01A-11R-A19O-07	6	THCA
TCGA-ET-A2MY-01A-11R-A18C-07	6	THCA
TCGA-DJ-A3VF-01A-11R-A23N-07	6	THCA
TCGA-EM-A22M-01A-11R-A32Y-07	6	THCA
TCGA-KS-A4I7-01A-11R-A250-07	6	THCA
TCGA-EM-A2P1-06A-11R-A206-07	6	THCA
TCGA-L6-A4EQ-01A-11R-A250-07	6	THCA
TCGA-BJ-A0Z5-01A-11R-A10U-07	6	THCA
TCGA-ET-A25L-01A-11R-A16R-07	6	THCA
TCGA-EL-A4KG-01A-11R-A250-07	6	THCA
TCGA-DE-A0Y3-01B-11R-A10U-07	6	THCA
TCGA-EL-A4K4-01A-11R-A250-07	6	THCA
TCGA-ET-A39M-01A-11R-A19O-07	6	THCA
TCGA-H2-A26U-01A-11R-A16R-07	6	THCA
TCGA-EM-A2OX-01A-11R-A206-07	6	THCA
TCGA-L6-A4ET-01A-11R-A250-07	6	THCA
TCGA-EL-A3T1-01A-11R-A22L-07	6	THCA
TCGA-J8-A3O2-06A-11R-A23N-07	6	THCA
TCGA-EM-A1YB-01A-11R-A14Y-07	6	THCA
TCGA-BJ-A45J-01A-11R-A23W-07	6	THCA
TCGA-J8-A3O1-01A-11R-A21D-07	6	THCA
TCGA-FE-A234-01A-11R-A14Y-07	6	THCA
TCGA-DE-A69J-01A-21R-A39I-07	6	THCA
TCGA-CE-A482-01A-11R-A23W-07	6	THCA
TCGA-BJ-A4O8-01A-11R-A250-07	6	THCA
TCGA-DO-A2HM-01B-11R-A22L-07	6	THCA
TCGA-ET-A39O-01A-11R-A19O-07	6	THCA
TCGA-DE-A4MB-01A-11R-A250-07	6	THCA
TCGA-EL-A3GX-01A-11R-A206-07	6	THCA
TCGA-ET-A2MX-01A-11R-A23N-07	6	THCA
TCGA-DJ-A2PW-01A-11R-A19O-07	6	THCA
TCGA-EM-A3SY-01A-11R-A22U-07	6	THCA
TCGA-EL-A4JX-01A-12R-A250-07	6	THCA
TCGA-DJ-A2PR-01A-11R-A19O-07	6	THCA
TCGA-ET-A39K-01A-11R-A19O-07	6	THCA
TCGA-MK-A4N9-01A-11R-A250-07	6	THCA
TCGA-FY-A4B3-01A-11R-A23W-07	6	THCA
TCGA-IM-A3U2-01A-21R-A22L-07	6	THCA
TCGA-EM-A3FK-01A-11R-A21D-07	6	THCA
TCGA-EM-A3O9-01A-11R-A220-07	6	THCA
TCGA-EL-A3D6-01A-12R-A206-07	6	THCA
TCGA-DJ-A2PT-01A-11R-A18C-07	6	THCA
TCGA-EL-A4KI-01A-11R-A250-07	6	THCA
TCGA-ET-A3BW-01A-11R-A19O-07	6	THCA
TCGA-EL-A3MZ-01A-11R-A21D-07	6	THCA
TCGA-EL-A3T7-01A-11R-A22L-07	6	THCA
TCGA-EL-A3H5-01A-11R-A206-07	6	THCA
TCGA-ET-A25G-01A-11R-A16R-07	6	THCA
TCGA-KS-A41F-01A-11R-A23N-07	6	THCA
TCGA-ET-A40S-01A-11R-A23N-07	6	THCA
TCGA-BJ-A4O9-01A-11R-A250-07	6	THCA
TCGA-MK-A4N6-01A-11R-A250-07	6	THCA
TCGA-DJ-A3VB-01A-11R-A23N-07	6	THCA
TCGA-H2-A2K9-01A-11R-A180-07	6	THCA
TCGA-BJ-A191-01A-11R-A13Y-07	6	THCA
TCGA-EL-A3MY-01A-11R-A21D-07	6	THCA
TCGA-EM-A4FM-01A-11R-A250-07	6	THCA
TCGA-EM-A22Q-01A-11R-A180-07	6	THCA
TCGA-EM-A22O-01A-11R-A180-07	6	THCA
TCGA-EM-A3ST-01A-11R-A22U-07	6	THCA
TCGA-EM-A2CR-01A-11R-A180-07	6	THCA
TCGA-ET-A3BX-01A-11R-A19O-07	6	THCA
TCGA-EL-A4K6-01A-12R-A250-07	7	THCA
TCGA-DE-A4MD-06A-11R-A250-07	7	THCA
TCGA-ET-A3DW-01A-11R-A19O-07	7	THCA
TCGA-BJ-A290-01A-11R-A180-07	7	THCA
TCGA-BJ-A3PU-01A-11R-A220-07	7	THCA
TCGA-DE-A4MC-01A-11R-A250-07	7	THCA
TCGA-L6-A4EP-01A-11R-A250-07	7	THCA
TCGA-E8-A418-01A-11R-A23N-07	7	THCA
TCGA-FY-A40M-01A-11R-A23N-07	7	THCA
TCGA-EL-A3D1-01A-11R-A19O-07	7	THCA
TCGA-DJ-A3UO-01A-11R-A22L-07	7	THCA
TCGA-FE-A22Z-01A-11R-A16R-07	7	THCA
TCGA-EL-A4K7-01A-11R-A250-07	7	THCA
TCGA-EM-A3FM-01A-11R-A21D-07	7	THCA
TCGA-MK-A4N7-01A-11R-A250-07	7	THCA
TCGA-EL-A3ZO-01A-11R-A23N-07	7	THCA
TCGA-ET-A25O-01A-11R-A16R-07	7	THCA
TCGA-FK-A3SH-01A-11R-A22L-07	7	THCA
TCGA-DO-A1JZ-01A-11R-A13Y-07	7	THCA
TCGA-EL-A3H3-01A-11R-A206-07	7	THCA
TCGA-KS-A4IB-01A-11R-A250-07	7	THCA
TCGA-GE-A2C6-01A-11R-A16R-07	7	THCA
TCGA-DJ-A2Q9-01A-21R-A18C-07	7	THCA
TCGA-EL-A3ZQ-01A-11R-A23N-07	7	THCA
TCGA-DJ-A2Q1-01A-22R-A19O-07	7	THCA
TCGA-KS-A4I1-01A-11R-A250-07	7	THCA
TCGA-4C-A93U-01A-11R-A39I-07	7	THCA
TCGA-DE-A4MA-01A-11R-A250-07	7	THCA
TCGA-ET-A3BV-01A-11R-A19O-07	7	THCA
TCGA-BJ-A0Z9-01A-11R-A10U-07	8	THCA
TCGA-EM-A3FO-01A-11R-A21D-07	8	THCA
TCGA-EL-A3ZM-01A-12R-A23N-07	8	THCA
TCGA-EL-A3T9-01A-21R-A22L-07	8	THCA
TCGA-EL-A3MX-01A-11R-A21D-07	8	THCA
TCGA-FE-A231-01A-11R-A14Y-07	8	THCA
TCGA-EL-A3GP-01A-11R-A206-07	8	THCA
TCGA-DE-A4MD-01A-11R-A250-07	9	THCA
TCGA-EM-A3O3-01A-11R-A220-07	9	THCA
TCGA-EL-A3CX-01A-11R-A19O-07	9	THCA
TCGA-ET-A4KN-01A-11R-A250-07	10	THCA
TCGA-86-A4P8-01A-11R-A24X-07	2	LUAD
TCGA-38-4626-01A-01R-1206-07	2	LUAD
TCGA-97-7553-01A-21R-2039-07	2	LUAD
TCGA-55-8621-01A-11R-2403-07	3	LUAD
TCGA-L4-A4E6-01A-11R-A24H-07	3	LUAD
TCGA-97-A4M2-01A-12R-A24X-07	3	LUAD
TCGA-99-AA5R-01A-11R-A39D-07	3	LUAD
TCGA-97-A4M1-01A-11R-A24X-07	3	LUAD
TCGA-91-8496-01A-11R-2403-07	3	LUAD
TCGA-97-7546-01A-11R-2039-07	3	LUAD
TCGA-53-7626-01A-12R-2066-07	3	LUAD
TCGA-55-7573-01A-11R-2039-07	3	LUAD
TCGA-55-8206-01A-11R-2241-07	3	LUAD
TCGA-78-7162-01A-21R-2066-07	3	LUAD
TCGA-97-8552-01A-11R-2403-07	3	LUAD
TCGA-67-4679-01B-01R-1755-07	3	LUAD
TCGA-44-2661-01A-01R-1107-07	3	LUAD
TCGA-50-5944-01A-11R-1755-07	4	LUAD
TCGA-J2-A4AE-01A-21R-A24H-07	4	LUAD
TCGA-75-6203-01A-11R-1755-07	4	LUAD
TCGA-86-8280-01A-11R-2287-07	4	LUAD
TCGA-86-A4P7-01A-11R-A24X-07	4	LUAD
TCGA-86-8671-01A-11R-2403-07	4	LUAD
TCGA-55-8097-01A-11R-2241-07	4	LUAD
TCGA-73-7498-01A-12R-2187-07	4	LUAD
TCGA-69-7763-01A-11R-2170-07	4	LUAD
TCGA-75-5146-01A-01R-1628-07	4	LUAD
TCGA-93-A4JO-01A-21R-A24X-07	4	LUAD
TCGA-55-8510-01A-11R-2403-07	4	LUAD
TCGA-64-1681-01A-11R-2066-07	4	LUAD
TCGA-44-5645-01A-01R-1628-07	4	LUAD
TCGA-97-7938-01A-11R-2170-07	4	LUAD
TCGA-38-7271-01A-11R-2039-07	4	LUAD
TCGA-49-6744-01A-11R-1858-07	4	LUAD
TCGA-44-2655-01A-01R-0946-07	4	LUAD
TCGA-67-6217-01A-11R-1755-07	4	LUAD
TCGA-93-A4JP-01A-11R-A24X-07	4	LUAD
TCGA-86-8076-01A-31R-2241-07	4	LUAD
TCGA-55-7283-01A-11R-2039-07	4	LUAD
TCGA-99-7458-01A-11R-2039-07	4	LUAD
TCGA-MP-A4TH-01A-31R-A262-07	4	LUAD
TCGA-50-5941-01A-11R-1755-07	4	LUAD
TCGA-62-A46Y-01A-11R-A24H-07	4	LUAD
TCGA-50-8460-01A-11R-2326-07	4	LUAD
TCGA-78-8648-01A-11R-2403-07	4	LUAD
TCGA-55-6986-01A-11R-1949-07	4	LUAD
TCGA-NJ-A55A-01A-11R-A262-07	4	LUAD
TCGA-97-A4LX-01A-11R-A24X-07	4	LUAD
TCGA-55-A48X-01A-11R-A24H-07	4	LUAD
TCGA-97-8172-01A-11R-2287-07	4	LUAD
TCGA-44-2657-01A-01R-1107-07	4	LUAD
TCGA-55-7227-01A-11R-2039-07	4	LUAD
TCGA-97-A4M5-01A-11R-A24X-07	4	LUAD
TCGA-67-3774-01A-01R-0946-07	4	LUAD
TCGA-95-8039-01A-11R-2241-07	4	LUAD
TCGA-44-A47G-01A-21R-A24H-07	4	LUAD
TCGA-97-A4M6-01A-11R-A24X-07	4	LUAD
TCGA-86-8056-01A-11R-2241-07	4	LUAD
TCGA-05-4384-01A-01R-1755-07	4	LUAD
TCGA-50-5942-01A-21R-1755-07	4	LUAD
TCGA-73-4677-01A-01R-1206-07	4	LUAD
TCGA-50-5045-01A-01R-1628-07	4	LUAD
TCGA-55-7574-01A-11R-2039-07	4	LUAD
TCGA-91-A4BD-01A-11R-A24H-07	4	LUAD
TCGA-67-3770-01A-01R-0946-07	5	LUAD
TCGA-49-4501-01A-01R-1206-07	5	LUAD
TCGA-86-A456-01A-11R-A24H-07	5	LUAD
TCGA-05-5423-01A-01R-1628-07	5	LUAD
TCGA-86-8668-01A-11R-2403-07	5	LUAD
TCGA-97-8174-01A-11R-2287-07	5	LUAD
TCGA-55-6543-01A-11R-1755-07	5	LUAD
TCGA-44-7659-01A-11R-2066-07	5	LUAD
TCGA-05-4430-01A-02R-1206-07	5	LUAD
TCGA-44-3919-01A-02R-1107-07	5	LUAD
TCGA-91-6835-01A-11R-1858-07	5	LUAD
TCGA-49-6745-01A-11R-1858-07	5	LUAD
TCGA-44-2659-01A-01R-0946-07	5	LUAD
TCGA-75-5126-01A-01R-1755-07	5	LUAD
TCGA-44-2656-01A-02R-0946-07	5	LUAD
TCGA-75-7025-01A-12R-1949-07	5	LUAD
TCGA-44-6147-01A-11R-1755-07	5	LUAD
TCGA-93-7347-01A-11R-2187-07	5	LUAD
TCGA-97-8177-01A-11R-2287-07	5	LUAD
TCGA-75-6212-01A-11R-1755-07	5	LUAD
TCGA-55-A57B-01A-12R-A39D-07	5	LUAD
TCGA-99-8028-01A-11R-2241-07	5	LUAD
TCGA-62-8395-01A-11R-2326-07	5	LUAD
TCGA-44-6776-01A-11R-1858-07	5	LUAD
TCGA-97-A4M0-01A-11R-A24X-07	5	LUAD
TCGA-97-A4M7-01A-11R-A24X-07	5	LUAD
TCGA-93-A4JN-01A-11R-A24X-07	5	LUAD
TCGA-49-AARR-01A-11R-A41B-07	5	LUAD
TCGA-55-7725-01A-11R-2170-07	5	LUAD
TCGA-50-5055-01A-01R-1628-07	5	LUAD
TCGA-L9-A743-01A-43R-A39D-07	5	LUAD
TCGA-49-4505-01A-01R-1206-07	5	LUAD
TCGA-50-6593-01A-11R-1755-07	5	LUAD
TCGA-50-8457-01A-11R-2326-07	5	LUAD
TCGA-67-3773-01A-01R-0946-07	5	LUAD
TCGA-97-8179-01A-11R-2287-07	5	LUAD
TCGA-55-6987-01A-11R-1949-07	5	LUAD
TCGA-55-6970-01A-11R-1949-07	5	LUAD
TCGA-50-5049-01A-01R-1628-07	5	LUAD
TCGA-55-8208-01A-11R-2241-07	5	LUAD
TCGA-MP-A4TJ-01A-51R-A262-07	5	LUAD
TCGA-05-4405-01A-21R-1858-07	5	LUAD
TCGA-55-7576-01A-11R-2066-07	5	LUAD
TCGA-69-8253-01A-11R-2287-07	5	LUAD
TCGA-MP-A4TI-01A-21R-A24X-07	5	LUAD
TCGA-55-6985-01A-11R-1949-07	5	LUAD
TCGA-MP-A4T9-01A-11R-A24X-07	5	LUAD
TCGA-44-8120-01A-11R-2241-07	5	LUAD
TCGA-73-4662-01A-01R-1206-07	5	LUAD
TCGA-55-A4DG-01A-11R-A24H-07	5	LUAD
TCGA-86-8073-01A-11R-2241-07	5	LUAD
TCGA-95-7947-01A-11R-2187-07	5	LUAD
TCGA-55-8207-01A-11R-2241-07	5	LUAD
TCGA-44-2666-01A-01R-0946-07	5	LUAD
TCGA-05-4249-01A-01R-1107-07	5	LUAD
TCGA-67-3772-01A-01R-0946-07	5	LUAD
TCGA-80-5607-01A-31R-1949-07	5	LUAD
TCGA-38-6178-01A-11R-1755-07	5	LUAD
TCGA-78-7160-01A-11R-2039-07	5	LUAD
TCGA-50-5068-01A-01R-1628-07	5	LUAD
TCGA-73-4658-01A-01R-1755-07	5	LUAD
TCGA-95-A4VN-01A-11R-A262-07	5	LUAD
TCGA-69-7974-01A-11R-2187-07	5	LUAD
TCGA-55-8513-01A-11R-2403-07	5	LUAD
TCGA-55-8205-01A-11R-2241-07	5	LUAD
TCGA-J2-A4AG-01A-11R-A24H-07	5	LUAD
TCGA-55-8619-01A-11R-2403-07	5	LUAD
TCGA-55-6971-01A-11R-1949-07	5	LUAD
TCGA-55-8087-01A-11R-2241-07	5	LUAD
TCGA-55-8090-01A-11R-2241-07	5	LUAD
TCGA-44-6148-01A-11R-1755-07	5	LUAD
TCGA-MP-A4T7-01A-11R-A24X-07	5	LUAD
TCGA-78-8655-01A-11R-2403-07	5	LUAD
TCGA-49-4512-01A-21R-1858-07	5	LUAD
TCGA-69-7765-01A-11R-2170-07	5	LUAD
TCGA-91-7771-01A-11R-2170-07	5	LUAD
TCGA-35-3615-01A-01R-0946-07	5	LUAD
TCGA-69-7764-01A-11R-2170-07	5	LUAD
TCGA-91-8497-01A-11R-2403-07	5	LUAD
TCGA-50-5939-01A-11R-1628-07	5	LUAD
TCGA-69-8453-01A-12R-2326-07	5	LUAD
TCGA-78-7143-01A-11R-2039-07	5	LUAD
TCGA-MP-A4SW-01A-21R-A24X-07	5	LUAD
TCGA-49-4510-01A-01R-1206-07	5	LUAD
TCGA-86-6562-01A-11R-1755-07	5	LUAD
TCGA-97-7554-01A-11R-2039-07	5	LUAD
TCGA-05-4410-01A-21R-1858-07	5	LUAD
TCGA-69-7980-01A-11R-2187-07	5	LUAD
TCGA-55-8299-01A-11R-2287-07	5	LUAD
TCGA-73-4676-01A-01R-1755-07	5	LUAD
TCGA-55-1595-01A-01R-0946-07	5	LUAD
TCGA-55-8512-01A-11R-2403-07	5	LUAD
TCGA-50-5932-01A-11R-1755-07	5	LUAD
TCGA-55-8616-01A-11R-2403-07	5	LUAD
TCGA-64-5778-01A-01R-1628-07	6	LUAD
TCGA-J2-8194-01A-11R-2241-07	6	LUAD
TCGA-55-6979-01A-11R-1949-07	6	LUAD
TCGA-91-6849-01A-11R-1949-07	6	LUAD
TCGA-05-4426-01A-01R-1206-07	6	LUAD
TCGA-78-8660-01A-11R-2403-07	6	LUAD
TCGA-75-6206-01A-11R-1755-07	6	LUAD
TCGA-44-6777-01A-11R-1858-07	6	LUAD
TCGA-J2-8192-01A-11R-2241-07	6	LUAD
TCGA-44-7661-01A-11R-2066-07	6	LUAD
TCGA-93-7348-01A-21R-2039-07	6	LUAD
TCGA-55-6980-01A-11R-1949-07	6	LUAD
TCGA-44-6145-01A-11R-1755-07	6	LUAD
TCGA-78-7152-01A-11R-2039-07	6	LUAD
TCGA-97-A4M3-01A-11R-A24X-07	6	LUAD
TCGA-95-7039-01A-11R-1949-07	6	LUAD
TCGA-91-6828-01A-11R-1858-07	6	LUAD
TCGA-95-A4VK-01A-11R-A262-07	6	LUAD
TCGA-MP-A4T4-01A-11R-A262-07	6	LUAD
TCGA-05-4244-01A-01R-1107-07	6	LUAD
TCGA-MP-A4SV-01A-11R-A24X-07	6	LUAD
TCGA-55-7727-01A-11R-2170-07	6	LUAD
TCGA-MN-A4N5-01A-11R-A24X-07	6	LUAD
TCGA-78-7147-01A-11R-2039-07	6	LUAD
TCGA-62-8394-01A-11R-2326-07	6	LUAD
TCGA-55-8301-01A-11R-2287-07	6	LUAD
TCGA-55-7281-01A-11R-2039-07	6	LUAD
TCGA-78-7633-01A-11R-2066-07	6	LUAD
TCGA-38-4627-01A-01R-1206-07	6	LUAD
TCGA-55-6981-01A-11R-1949-07	6	LUAD
TCGA-86-8281-01A-11R-2287-07	6	LUAD
TCGA-86-8075-01A-11R-2241-07	6	LUAD
TCGA-MP-A4T6-01A-32R-A262-07	6	LUAD
TCGA-55-8091-01A-11R-2241-07	6	LUAD
TCGA-62-A472-01A-11R-A24H-07	6	LUAD
TCGA-05-4402-01A-01R-1206-07	6	LUAD
TCGA-64-1680-01A-02R-0946-07	6	LUAD
TCGA-O1-A52J-01A-11R-A262-07	6	LUAD
TCGA-49-4487-01A-21R-1858-07	6	LUAD
TCGA-NJ-A4YG-01A-22R-A262-07	6	LUAD
TCGA-49-4486-01A-01R-1206-07	6	LUAD
TCGA-05-5425-01A-02R-1628-07	6	LUAD
TCGA-55-7911-01A-11R-2170-07	6	LUAD
TCGA-44-3918-01A-01R-1107-07	6	LUAD
TCGA-50-5935-01A-11R-1755-07	6	LUAD
TCGA-55-6983-01A-11R-1949-07	6	LUAD
TCGA-44-6775-01A-11R-1858-07	6	LUAD
TCGA-44-7672-01A-11R-2066-07	6	LUAD
TCGA-91-6830-01A-11R-1949-07	6	LUAD
TCGA-55-6978-01A-11R-1949-07	6	LUAD
TCGA-78-7537-01A-11R-2066-07	6	LUAD
TCGA-MP-A4TK-01A-11R-A24X-07	6	LUAD
TCGA-49-AAR0-01A-21R-A39D-07	6	LUAD
TCGA-55-8514-01A-11R-2403-07	6	LUAD
TCGA-55-6712-01A-11R-1858-07	6	LUAD
TCGA-69-7978-01A-11R-2187-07	6	LUAD
TCGA-44-3398-01A-01R-1107-07	6	LUAD
TCGA-55-7914-01A-11R-2170-07	6	LUAD
TCGA-NJ-A55O-01A-11R-A262-07	6	LUAD
TCGA-78-7158-01A-11R-2039-07	6	LUAD
TCGA-44-7671-01A-11R-2066-07	6	LUAD
TCGA-55-A492-01A-11R-A24H-07	6	LUAD
TCGA-38-A44F-01A-11R-A24H-07	6	LUAD
TCGA-69-A59K-01A-11R-A262-07	6	LUAD
TCGA-67-6216-01A-11R-1755-07	6	LUAD
TCGA-86-7714-01A-12R-2170-07	6	LUAD
TCGA-67-6215-01A-11R-1755-07	6	LUAD
TCGA-55-1592-01A-01R-0946-07	6	LUAD
TCGA-49-AARO-01A-12R-A41B-07	6	LUAD
TCGA-78-7167-01A-11R-2066-07	6	LUAD
TCGA-86-7954-01A-11R-2187-07	6	LUAD
TCGA-55-7903-01A-11R-2170-07	6	LUAD
TCGA-73-4659-01A-01R-1206-07	6	LUAD
TCGA-55-8507-01A-11R-2403-07	6	LUAD
TCGA-50-5066-01A-01R-1628-07	6	LUAD
TCGA-55-8085-01A-11R-2241-07	6	LUAD
TCGA-55-8089-01A-11R-2241-07	6	LUAD
TCGA-62-A46S-01A-11R-A24H-07	6	LUAD
TCGA-L9-A50W-01A-12R-A39D-07	6	LUAD
TCGA-78-7145-01A-11R-2039-07	6	LUAD
TCGA-44-6778-01A-11R-1858-07	6	LUAD
TCGA-97-7941-01A-11R-2187-07	6	LUAD
TCGA-62-A470-01A-11R-A24H-07	6	LUAD
TCGA-05-4424-01A-22R-1858-07	6	LUAD
TCGA-93-A4JQ-01A-11R-A24X-07	6	LUAD
TCGA-62-8399-01A-21R-2326-07	6	LUAD
TCGA-55-6982-01A-11R-1949-07	6	LUAD
TCGA-05-4417-01A-22R-1858-07	6	LUAD
TCGA-78-7149-01A-11R-2039-07	6	LUAD
TCGA-69-8254-01A-11R-2287-07	6	LUAD
TCGA-55-8511-01A-11R-2403-07	6	LUAD
TCGA-50-7109-01A-11R-2039-07	6	LUAD
TCGA-44-4112-01A-01R-1107-07	6	LUAD
TCGA-55-7816-01A-11R-2170-07	6	LUAD
TCGA-44-A47A-01A-21R-A24H-07	6	LUAD
TCGA-44-8117-01A-11R-2241-07	6	LUAD
TCGA-86-8074-01A-11R-2241-07	6	LUAD
TCGA-78-7156-01A-11R-2039-07	6	LUAD
TCGA-50-5044-01A-21R-1858-07	6	LUAD
TCGA-75-7030-01A-11R-1949-07	6	LUAD
TCGA-55-8614-01A-11R-2403-07	6	LUAD
TCGA-86-6851-01A-11R-1949-07	6	LUAD
TCGA-05-4250-01A-01R-1107-07	6	LUAD
TCGA-05-4434-01A-01R-1206-07	6	LUAD
TCGA-86-A4JF-01A-11R-A24X-07	6	LUAD
TCGA-L4-A4E5-01A-11R-A24X-07	6	LUAD
TCGA-55-8302-01A-11R-2326-07	6	LUAD
TCGA-NJ-A4YQ-01A-11R-A262-07	6	LUAD
TCGA-75-5125-01A-01R-1755-07	6	LUAD
TCGA-L9-A444-01A-21R-A24H-07	6	LUAD
TCGA-44-A4SU-01A-11R-A24X-07	6	LUAD
TCGA-97-8176-01A-11R-2403-07	6	LUAD
TCGA-64-1677-01A-01R-0946-07	6	LUAD
TCGA-73-4668-01A-01R-1206-07	7	LUAD
TCGA-L9-A443-01A-12R-A24H-07	7	LUAD
TCGA-75-7031-01A-11R-1949-07	7	LUAD
TCGA-86-8278-01A-11R-2287-07	7	LUAD
TCGA-99-8025-01A-11R-2241-07	7	LUAD
TCGA-64-5815-01A-01R-1628-07	7	LUAD
TCGA-62-8397-01A-11R-2326-07	7	LUAD
TCGA-97-7552-01A-11R-2039-07	7	LUAD
TCGA-05-4432-01A-01R-1206-07	7	LUAD
TCGA-05-4398-01A-01R-1206-07	7	LUAD
TCGA-S2-AA1A-01A-12R-A39D-07	7	LUAD
TCGA-86-8055-01A-11R-2241-07	7	LUAD
TCGA-73-7499-01A-11R-2187-07	7	LUAD
TCGA-95-A4VP-01A-21R-A262-07	7	LUAD
TCGA-05-4427-01A-21R-1858-07	7	LUAD
TCGA-95-7948-01A-11R-2187-07	7	LUAD
TCGA-49-AARN-01A-21R-A41B-07	7	LUAD
TCGA-75-6205-01A-11R-1755-07	7	LUAD
TCGA-38-4625-01A-01R-1206-07	7	LUAD
TCGA-62-A46R-01A-11R-A24H-07	7	LUAD
TCGA-97-8175-01A-11R-2287-07	7	LUAD
TCGA-86-7953-01A-11R-2187-07	7	LUAD
TCGA-MP-A4TD-01A-32R-A262-07	7	LUAD
TCGA-50-5066-02A-11R-2090-07	7	LUAD
TCGA-05-4433-01A-22R-1858-07	7	LUAD
TCGA-97-7547-01A-11R-2039-07	7	LUAD
TCGA-05-4425-01A-01R-1755-07	7	LUAD
TCGA-49-4488-01A-01R-1755-07	7	LUAD
TCGA-49-4490-01A-21R-1858-07	7	LUAD
TCGA-44-6774-01A-21R-1858-07	7	LUAD
TCGA-83-5908-01A-21R-2287-07	7	LUAD
TCGA-50-5946-02A-11R-2090-07	7	LUAD
TCGA-73-4675-01A-01R-1206-07	7	LUAD
TCGA-49-AAQV-01A-11R-A39D-07	7	LUAD
TCGA-MP-A5C7-01A-11R-A262-07	7	LUAD
TCGA-71-6725-01A-11R-1858-07	7	LUAD
TCGA-49-4494-01A-01R-1206-07	7	LUAD
TCGA-50-5930-01A-11R-1755-07	7	LUAD
TCGA-93-8067-01A-11R-2287-07	7	LUAD
TCGA-75-6207-01A-11R-1755-07	7	LUAD
TCGA-73-4666-01A-01R-1206-07	7	LUAD
TCGA-55-6642-01A-11R-1858-07	7	LUAD
TCGA-50-6597-01A-11R-1858-07	7	LUAD
TCGA-86-8669-01A-11R-2403-07	7	LUAD
TCGA-86-8279-01A-11R-2287-07	7	LUAD
TCGA-55-8203-01A-11R-2241-07	7	LUAD
TCGA-38-4628-01A-01R-1206-07	7	LUAD
TCGA-J2-A4AD-01A-11R-A24H-07	7	LUAD
TCGA-55-7907-01A-11R-2170-07	7	LUAD
TCGA-44-A47B-01A-11R-A24H-07	7	LUAD
TCGA-NJ-A7XG-01A-12R-A39D-07	7	LUAD
TCGA-78-7539-01A-11R-2066-07	7	LUAD
TCGA-62-A46P-01A-11R-A24H-07	7	LUAD
TCGA-91-6829-01A-21R-1858-07	7	LUAD
TCGA-NJ-A4YI-01A-11R-A262-07	7	LUAD
TCGA-38-4632-01A-01R-1755-07	7	LUAD
TCGA-44-3396-01A-01R-1206-07	7	LUAD
TCGA-55-7724-01A-11R-2170-07	7	LUAD
TCGA-50-8459-01A-11R-2326-07	7	LUAD
TCGA-99-8033-01A-11R-2241-07	7	LUAD
TCGA-50-5936-01A-11R-1628-07	7	LUAD
TCGA-71-8520-01A-11R-2403-07	7	LUAD
TCGA-69-7979-01A-11R-2187-07	7	LUAD
TCGA-38-4629-01A-02R-1206-07	7	LUAD
TCGA-MP-A4SY-01A-21R-A24X-07	7	LUAD
TCGA-55-7995-01A-11R-2187-07	7	LUAD
TCGA-78-8662-01A-11R-2403-07	7	LUAD
TCGA-35-4122-01A-01R-1107-07	7	LUAD
TCGA-49-AAR4-01A-12R-A41B-07	7	LUAD
TCGA-49-AARE-01A-11R-A41B-07	7	LUAD
TCGA-44-2668-01A-01R-0946-07	7	LUAD
TCGA-05-5715-01A-01R-1628-07	7	LUAD
TCGA-80-5608-01A-31R-1949-07	7	LUAD
TCGA-91-6840-01A-11R-1949-07	7	LUAD
TCGA-44-7669-01A-21R-2066-07	7	LUAD
TCGA-05-5428-01A-01R-1628-07	7	LUAD
TCGA-55-A48Y-01A-11R-A24H-07	7	LUAD
TCGA-49-6761-01A-31R-1949-07	7	LUAD
TCGA-78-8640-01A-11R-2403-07	7	LUAD
TCGA-55-8096-01A-11R-2241-07	7	LUAD
TCGA-62-A46V-01A-11R-A24H-07	7	LUAD
TCGA-55-A48Z-01A-12R-A24X-07	7	LUAD
TCGA-55-A4DF-01A-11R-A24H-07	7	LUAD
TCGA-69-7973-01A-11R-2187-07	7	LUAD
TCGA-50-6595-01A-12R-1858-07	7	LUAD
TCGA-MP-A4TC-01A-11R-A24X-07	7	LUAD
TCGA-78-7148-01A-11R-2039-07	7	LUAD
TCGA-05-4389-01A-01R-1206-07	7	LUAD
TCGA-50-5051-01A-21R-1858-07	7	LUAD
TCGA-L9-A8F4-01A-11R-A39D-07	7	LUAD
TCGA-50-5072-01A-21R-1858-07	7	LUAD
TCGA-78-7161-01A-11R-2039-07	8	LUAD
TCGA-MN-A4N1-01A-11R-A24X-07	8	LUAD
TCGA-86-8359-01A-11R-2326-07	8	LUAD
TCGA-MP-A4T8-01A-11R-A24X-07	8	LUAD
TCGA-86-7713-01A-11R-2066-07	8	LUAD
TCGA-05-4403-01A-01R-1206-07	8	LUAD
TCGA-86-7701-01A-11R-2170-07	8	LUAD
TCGA-86-8585-01A-11R-2403-07	8	LUAD
TCGA-78-7535-01A-11R-2066-07	8	LUAD
TCGA-44-2665-01A-01R-0946-07	8	LUAD
TCGA-78-7154-01A-11R-2039-07	8	LUAD
TCGA-49-6743-01A-11R-1858-07	8	LUAD
TCGA-95-7567-01A-11R-2066-07	8	LUAD
TCGA-95-8494-01A-11R-2326-07	8	LUAD
TCGA-50-6673-01A-11R-1949-07	8	LUAD
TCGA-97-8171-01A-11R-2287-07	8	LUAD
TCGA-55-7284-01B-11R-2241-07	8	LUAD
TCGA-78-7166-01A-12R-2066-07	8	LUAD
TCGA-55-7728-01A-11R-2187-07	8	LUAD
TCGA-75-5122-01A-01R-1755-07	8	LUAD
TCGA-55-6972-01A-11R-1949-07	8	LUAD
TCGA-05-4396-01A-21R-1858-07	8	LUAD
TCGA-55-8092-01A-11R-2241-07	8	LUAD
TCGA-55-8508-01A-11R-2403-07	8	LUAD
TCGA-49-4514-01A-21R-1858-07	8	LUAD
TCGA-95-7562-01A-11R-2241-07	8	LUAD
TCGA-97-7937-01A-11R-2170-07	8	LUAD
TCGA-78-7153-01A-11R-2039-07	8	LUAD
TCGA-78-7159-01A-11R-2039-07	8	LUAD
TCGA-55-7994-01A-11R-2187-07	8	LUAD
TCGA-75-7027-01A-11R-1949-07	8	LUAD
TCGA-75-5147-01A-01R-1628-07	8	LUAD
TCGA-44-7670-01A-11R-2066-07	8	LUAD
TCGA-64-1679-01A-21R-2066-07	8	LUAD
TCGA-53-7813-01A-11R-2170-07	8	LUAD
TCGA-55-8506-01A-11R-2403-07	8	LUAD
TCGA-64-1676-01A-01R-0946-07	8	LUAD
TCGA-05-4382-01A-01R-1206-07	8	LUAD
TCGA-49-6742-01A-11R-1858-07	8	LUAD
TCGA-55-1594-01A-01R-0946-07	8	LUAD
TCGA-73-4670-01A-01R-1206-07	8	LUAD
TCGA-05-5420-01A-01R-1628-07	8	LUAD
TCGA-55-6984-01A-11R-1949-07	8	LUAD
TCGA-99-8032-01A-11R-2241-07	8	LUAD
TCGA-MP-A4TF-01A-11R-A262-07	8	LUAD
TCGA-55-7910-01A-11R-2170-07	8	LUAD
TCGA-05-4422-01A-01R-1206-07	8	LUAD
TCGA-44-6146-01A-11R-1755-07	8	LUAD
TCGA-97-8547-01A-11R-2403-07	8	LUAD
TCGA-49-AAR3-01A-11R-A41B-07	8	LUAD
TCGA-86-8673-01A-11R-2403-07	8	LUAD
TCGA-91-A4BC-01A-11R-A24H-07	8	LUAD
TCGA-86-8054-01A-11R-2241-07	8	LUAD
TCGA-05-4418-01A-01R-1206-07	8	LUAD
TCGA-91-6831-01A-11R-1858-07	8	LUAD
TCGA-44-7662-01A-11R-2066-07	8	LUAD
TCGA-49-AARQ-01A-11R-A41B-07	8	LUAD
TCGA-L9-A7SV-01A-11R-A39D-07	8	LUAD
TCGA-67-3771-01A-01R-0946-07	8	LUAD
TCGA-62-A46U-01A-11R-A24H-07	8	LUAD
TCGA-86-8674-01A-21R-2403-07	8	LUAD
TCGA-44-A4SS-01A-11R-A24X-07	8	LUAD
TCGA-78-7540-01A-11R-2066-07	8	LUAD
TCGA-62-8398-01A-11R-2326-07	8	LUAD
TCGA-NJ-A4YP-01A-11R-A262-07	8	LUAD
TCGA-55-A493-01A-11R-A24H-07	8	LUAD
TCGA-95-7043-01A-11R-1949-07	8	LUAD
TCGA-35-4123-01A-01R-1107-07	8	LUAD
TCGA-69-7760-01A-11R-2170-07	8	LUAD
TCGA-55-A491-01A-11R-A24H-07	8	LUAD
TCGA-69-7761-01A-11R-2170-07	8	LUAD
TCGA-44-A479-01A-31R-A24H-07	9	LUAD
TCGA-73-A9RS-01A-11R-A41B-07	9	LUAD
TCGA-50-5933-01A-11R-1755-07	9	LUAD
TCGA-55-7726-01A-11R-2170-07	9	LUAD
TCGA-55-8204-01A-11R-2241-07	9	LUAD
TCGA-86-8672-01A-21R-2403-07	9	LUAD
TCGA-75-6211-01A-11R-1755-07	9	LUAD
TCGA-05-4420-01A-01R-1206-07	9	LUAD
TCGA-78-7542-01A-21R-2066-07	9	LUAD
TCGA-55-8505-01A-11R-2403-07	9	LUAD
TCGA-55-6969-01A-11R-1949-07	9	LUAD
TCGA-44-2662-01A-01R-0946-07	9	LUAD
TCGA-64-5779-01A-01R-1628-07	9	LUAD
TCGA-78-7146-01A-11R-2039-07	9	LUAD
TCGA-78-7220-01A-11R-2039-07	9	LUAD
TCGA-55-8615-01A-11R-2403-07	9	LUAD
TCGA-44-5643-01A-01R-1628-07	9	LUAD
TCGA-91-6836-01A-21R-1858-07	9	LUAD
TCGA-50-6592-01A-11R-1755-07	9	LUAD
TCGA-64-5781-01A-01R-1628-07	9	LUAD
TCGA-49-4506-01A-01R-1206-07	9	LUAD
TCGA-44-8119-01A-11R-2241-07	9	LUAD
TCGA-91-6848-01A-11R-1949-07	9	LUAD
TCGA-55-7570-01A-11R-2039-07	9	LUAD
TCGA-MN-A4N4-01A-12R-A24X-07	9	LUAD
TCGA-49-4507-01A-01R-1206-07	9	LUAD
TCGA-95-7944-01A-11R-2187-07	9	LUAD
TCGA-55-6975-01A-11R-1949-07	9	LUAD
TCGA-05-4395-01A-01R-1206-07	9	LUAD
TCGA-53-A4EZ-01A-12R-A24X-07	9	LUAD
TCGA-35-5375-01A-01R-1628-07	9	LUAD
TCGA-86-A4D0-01A-11R-A24H-07	9	LUAD
TCGA-49-AAR2-01A-11R-A39D-07	9	LUAD
TCGA-MP-A4TA-01A-21R-A24X-07	9	LUAD
TCGA-50-5946-01A-11R-1755-07	9	LUAD
TCGA-05-4415-01A-22R-1858-07	9	LUAD
TCGA-NJ-A4YF-01A-12R-A262-07	10	LUAD
TCGA-55-1596-01A-01R-0946-07	10	LUAD
TCGA-55-7913-01B-11R-2241-07	10	LUAD
TCGA-86-7711-01A-11R-2066-07	10	LUAD
TCGA-50-6590-01A-12R-1858-07	10	LUAD
TCGA-05-4397-01A-01R-1206-07	10	LUAD
TCGA-62-A471-01A-12R-A24H-07	10	LUAD
TCGA-62-8402-01A-11R-2326-07	10	LUAD
TCGA-49-6767-01A-11R-1858-07	10	LUAD
TCGA-91-8499-01A-11R-2403-07	10	LUAD
TCGA-44-7660-01A-11R-2066-07	10	LUAD
TCGA-05-4390-01A-02R-1755-07	10	LUAD
TCGA-50-5931-01A-11R-1755-07	10	LUAD
TCGA-80-5611-01A-01R-1628-07	10	LUAD
TCGA-55-A490-01A-11R-A466-07	10	LUAD
TCGA-55-7815-01A-11R-2170-07	10	LUAD
TCGA-55-8620-01A-11R-2403-07	10	LUAD
TCGA-78-7536-01A-11R-2066-07	10	LUAD
TCGA-64-5774-01A-01R-1628-07	10	LUAD
TCGA-78-7163-01A-12R-2066-07	10	LUAD
TCGA-86-8358-01A-11R-2326-07	10	LUAD
TCGA-50-6594-01A-11R-1755-07	10	LUAD
TCGA-44-6779-01A-11R-1858-07	10	LUAD
TCGA-78-7150-01A-21R-2039-07	10	LUAD
TCGA-55-6968-01A-11R-1949-07	10	LUAD
TCGA-75-6214-01A-41R-1949-07	10	LUAD
TCGA-86-7955-01A-11R-2187-07	10	LUAD
TCGA-38-4631-01A-01R-1755-07	10	LUAD
TCGA-NJ-A55R-01A-11R-A262-07	10	LUAD
TCGA-62-A46O-01A-11R-A24H-07	11	LUAD
TCGA-4B-A93V-01A-11R-A39D-07	11	LUAD
TCGA-L9-A5IP-01A-21R-A39D-07	11	LUAD
TCGA-69-8255-01A-11R-2287-07	11	LUAD
TCGA-55-A494-01A-11R-A24X-07	11	LUAD
TCGA-38-4630-01A-01R-1206-07	11	LUAD
TCGA-64-1678-01A-01R-0946-07	11	LUAD
TCGA-44-5644-01A-21R-2039-07	11	LUAD
TCGA-44-7667-01A-31R-2066-07	11	LUAD
TCGA-05-5429-01A-01R-1628-07	11	LUAD
TCGA-55-8094-01A-11R-2241-07	11	LUAD
TCGA-MP-A4TE-01A-22R-A466-07	11	LUAD
TCGA-53-7624-01A-11R-2066-07	12	LUAD
TCGA-55-5899-01A-11R-1628-07	12	LUAD
TCGA-91-6847-01A-11R-1949-07	12	LUAD
TCGA-49-AAR9-01A-21R-A41B-07	12	LUAD
TCGA-50-6591-01A-11R-1755-07	12	LUAD
TCGA-78-7155-01A-11R-2039-07	13	LUAD
TCGA-64-5775-01A-01R-1628-07	13	LUAD
TCGA-56-8623-01A-11R-A28V-07	2	LUSC
TCGA-77-A5FZ-01A-31R-A27Q-07	3	LUSC
TCGA-98-A53D-01A-32R-A262-07	3	LUSC
TCGA-98-A53C-01A-11R-A262-07	3	LUSC
TCGA-60-2697-01A-11R-2125-07	4	LUSC
TCGA-85-A513-01A-12R-A26W-07	4	LUSC
TCGA-NC-A5HJ-01A-11R-A26W-07	5	LUSC
TCGA-22-1005-01A-01R-0692-07	5	LUSC
TCGA-46-3766-01A-01R-0980-07	5	LUSC
TCGA-22-4596-01A-01R-1201-07	5	LUSC
TCGA-98-7454-01A-11R-2045-07	5	LUSC
TCGA-22-1002-01A-01R-0692-07	5	LUSC
TCGA-56-A4ZJ-01A-11R-A262-07	5	LUSC
TCGA-60-2704-01A-11R-2045-07	5	LUSC
TCGA-22-1016-01A-01R-0692-07	5	LUSC
TCGA-85-A4PA-01A-11R-A24Z-07	6	LUSC
TCGA-98-A53H-01A-12R-A262-07	6	LUSC
TCGA-60-2715-01A-01R-0851-07	6	LUSC
TCGA-68-8250-01A-11R-2296-07	6	LUSC
TCGA-66-2744-01A-01R-0980-07	6	LUSC
TCGA-66-2786-01A-01R-0851-07	6	LUSC
TCGA-90-7964-01A-21R-2187-07	6	LUSC
TCGA-22-5472-01A-01R-1635-07	6	LUSC
TCGA-60-2709-01A-21R-1820-07	6	LUSC
TCGA-34-2608-01A-02R-0851-07	6	LUSC
TCGA-85-8351-01A-11R-2296-07	6	LUSC
TCGA-22-1017-01A-01R-0692-07	6	LUSC
TCGA-85-8048-01A-11R-2247-07	6	LUSC
TCGA-96-7545-01A-21R-2045-07	6	LUSC
TCGA-43-6773-01A-41R-1949-07	6	LUSC
TCGA-46-3767-01A-01R-0980-07	6	LUSC
TCGA-58-8393-01A-11R-2326-07	6	LUSC
TCGA-52-7622-01A-11R-2125-07	6	LUSC
TCGA-96-8169-01A-11R-2296-07	6	LUSC
TCGA-77-8146-01A-11R-2247-07	6	LUSC
TCGA-66-2769-01A-02R-0851-07	6	LUSC
TCGA-56-8628-01A-11R-2403-07	6	LUSC
TCGA-56-7731-01A-11R-2125-07	6	LUSC
TCGA-60-2695-01A-01R-0851-07	6	LUSC
TCGA-22-1000-01A-01R-A32Z-07	6	LUSC
TCGA-60-2696-01A-01R-0851-07	6	LUSC
TCGA-66-2753-01A-01R-0980-07	7	LUSC
TCGA-60-2698-01A-01R-0851-07	7	LUSC
TCGA-56-A49D-01A-11R-A24H-07	7	LUSC
TCGA-22-0940-01A-01R-0692-07	7	LUSC
TCGA-58-8388-01A-11R-2326-07	7	LUSC
TCGA-52-7812-01A-11R-2125-07	7	LUSC
TCGA-63-6202-01A-11R-1820-07	7	LUSC
TCGA-43-2578-01A-01R-0851-07	7	LUSC
TCGA-39-5039-01A-01R-1443-07	7	LUSC
TCGA-85-6175-01A-11R-1820-07	7	LUSC
TCGA-L3-A4E7-01A-11R-A24Z-07	7	LUSC
TCGA-85-8072-01A-31R-2247-07	7	LUSC
TCGA-34-5234-01A-01R-1635-07	7	LUSC
TCGA-39-5022-01A-21R-1820-07	7	LUSC
TCGA-63-A5MS-01A-11R-A26W-07	7	LUSC
TCGA-77-7142-01A-11R-2045-07	7	LUSC
TCGA-56-6545-01A-11R-1820-07	7	LUSC
TCGA-56-8309-01A-11R-2296-07	7	LUSC
TCGA-58-8386-01A-11R-2296-07	7	LUSC
TCGA-22-5492-01A-01R-1635-07	7	LUSC
TCGA-66-2767-01A-01R-0851-07	7	LUSC
TCGA-60-2725-01A-01R-1201-07	7	LUSC
TCGA-85-8584-01A-11R-2403-07	7	LUSC
TCGA-90-A4EE-01A-11R-A24Z-07	7	LUSC
TCGA-60-2714-01A-01R-0851-07	7	LUSC
TCGA-85-8353-01A-21R-2296-07	7	LUSC
TCGA-22-5489-01A-01R-1635-07	7	LUSC
TCGA-60-2706-01A-01R-0851-07	7	LUSC
TCGA-58-A46J-01A-11R-A24H-07	7	LUSC
TCGA-63-7020-01A-11R-1949-07	7	LUSC
TCGA-63-7022-01A-11R-1949-07	7	LUSC
TCGA-33-6737-01A-11R-1820-07	7	LUSC
TCGA-70-6722-01A-11R-1820-07	7	LUSC
TCGA-85-A50M-01A-21R-A262-07	7	LUSC
TCGA-96-A4JL-01A-11R-A24Z-07	7	LUSC
TCGA-18-3409-01A-01R-0980-07	7	LUSC
TCGA-98-A53B-01A-11R-A262-07	7	LUSC
TCGA-39-5030-01A-01R-1443-07	7	LUSC
TCGA-60-2710-01A-01R-0851-07	7	LUSC
TCGA-85-7844-01A-11R-2125-07	7	LUSC
TCGA-66-2758-01A-02R-0851-07	7	LUSC
TCGA-98-8022-01A-11R-2247-07	7	LUSC
TCGA-34-8454-01A-11R-2326-07	7	LUSC
TCGA-77-8138-01A-11R-2247-07	7	LUSC
TCGA-56-8625-01A-11R-2403-07	7	LUSC
TCGA-66-2742-01A-01R-0980-07	7	LUSC
TCGA-94-8491-01A-11R-2326-07	7	LUSC
TCGA-56-A4BY-01A-11R-A24H-07	7	LUSC
TCGA-94-7943-01A-11R-2187-07	7	LUSC
TCGA-66-2777-01A-01R-1201-07	7	LUSC
TCGA-63-A5MN-01A-22R-A27Q-07	7	LUSC
TCGA-63-A5MP-01A-11R-A26W-07	7	LUSC
TCGA-33-4547-01A-01R-1201-07	7	LUSC
TCGA-66-2789-01A-01R-0980-07	7	LUSC
TCGA-21-1076-01A-02R-0692-07	7	LUSC
TCGA-43-2581-01A-01R-0851-07	7	LUSC
TCGA-22-4609-01A-21R-2125-07	7	LUSC
TCGA-21-5787-01A-01R-1635-07	7	LUSC
TCGA-60-2712-01A-01R-0851-07	7	LUSC
TCGA-56-8626-01A-11R-2403-07	7	LUSC
TCGA-66-2757-01A-01R-0851-07	7	LUSC
TCGA-66-2734-01A-01R-0980-07	7	LUSC
TCGA-77-A5G1-01A-11R-A27Q-07	7	LUSC
TCGA-34-5241-01A-01R-1443-07	7	LUSC
TCGA-21-1070-01A-01R-0692-07	7	LUSC
TCGA-85-8287-01A-11R-2296-07	7	LUSC
TCGA-34-8455-01A-11R-2326-07	7	LUSC
TCGA-68-7756-01A-11R-2125-07	7	LUSC
TCGA-60-2719-01A-01R-0851-07	7	LUSC
TCGA-66-2727-01A-01R-0980-07	7	LUSC
TCGA-85-8355-01A-11R-2296-07	7	LUSC
TCGA-22-5478-01A-01R-1635-07	8	LUSC
TCGA-52-7811-01A-11R-2125-07	8	LUSC
TCGA-85-8276-01A-11R-2296-07	8	LUSC
TCGA-43-A475-01A-11R-A24H-07	8	LUSC
TCGA-85-A510-01A-11R-A26W-07	8	LUSC
TCGA-66-2771-01A-01R-0980-07	8	LUSC
TCGA-66-2737-01A-01R-0980-07	8	LUSC
TCGA-39-5011-01A-01R-1443-07	8	LUSC
TCGA-22-4601-01A-01R-1443-07	8	LUSC
TCGA-98-A539-01A-31R-A262-07	8	LUSC
TCGA-66-2800-01A-01R-1201-07	8	LUSC
TCGA-56-6546-01A-11R-1820-07	8	LUSC
TCGA-56-8624-01A-11R-2403-07	8	LUSC
TCGA-66-2773-01A-01R-1201-07	8	LUSC
TCGA-52-7809-01A-21R-2125-07	8	LUSC
TCGA-56-5898-01A-11R-1635-07	8	LUSC
TCGA-66-2782-01A-01R-0851-07	8	LUSC
TCGA-22-A5C4-01A-12R-A27Q-07	8	LUSC
TCGA-66-2770-01A-01R-0851-07	8	LUSC
TCGA-22-5477-01A-01R-1635-07	8	LUSC
TCGA-66-2791-01A-01R-0980-07	8	LUSC
TCGA-43-5668-01A-01R-1635-07	8	LUSC
TCGA-63-A5MT-01A-21R-A26W-07	8	LUSC
TCGA-43-A56U-01A-11R-A26W-07	8	LUSC
TCGA-43-8116-01A-11R-2247-07	8	LUSC
TCGA-22-5480-01A-01R-1635-07	8	LUSC
TCGA-21-5784-01A-01R-1635-07	8	LUSC
TCGA-22-4591-01A-01R-1201-07	8	LUSC
TCGA-66-2763-01A-01R-0851-07	8	LUSC
TCGA-92-7340-01A-21R-2045-07	8	LUSC
TCGA-66-2765-01A-01R-0851-07	8	LUSC
TCGA-22-4594-01A-01R-1201-07	8	LUSC
TCGA-60-2707-01A-01R-0851-07	8	LUSC
TCGA-60-2720-01A-01R-0851-07	8	LUSC
TCGA-77-7465-01A-11R-2045-07	8	LUSC
TCGA-21-1077-01A-01R-0692-07	8	LUSC
TCGA-34-5239-01A-21R-1820-07	8	LUSC
TCGA-98-8021-01A-11R-2247-07	8	LUSC
TCGA-22-5485-01A-01R-1635-07	8	LUSC
TCGA-60-2723-01A-01R-0851-07	8	LUSC
TCGA-77-8131-01A-11R-2247-07	8	LUSC
TCGA-63-A5MB-01A-11R-A26W-07	8	LUSC
TCGA-34-2596-01A-01R-0851-07	8	LUSC
TCGA-34-5232-01A-21R-1820-07	8	LUSC
TCGA-43-6770-01A-11R-1820-07	8	LUSC
TCGA-39-5035-01A-01R-1443-07	8	LUSC
TCGA-43-8115-01A-11R-2247-07	8	LUSC
TCGA-66-2795-01A-02R-0980-07	8	LUSC
TCGA-85-8350-01A-11R-2296-07	8	LUSC
TCGA-56-A5DS-01A-11R-A27Q-07	8	LUSC
TCGA-39-5029-01A-01R-1443-07	8	LUSC
TCGA-98-8023-01A-11R-2247-07	8	LUSC
TCGA-22-4605-01A-21R-2125-07	8	LUSC
TCGA-85-6561-01A-11R-1820-07	8	LUSC
TCGA-77-A5G6-01A-11R-A27Q-07	8	LUSC
TCGA-85-8052-01A-11R-2247-07	8	LUSC
TCGA-66-2794-01A-01R-1201-07	8	LUSC
TCGA-77-8007-01A-11R-2187-07	8	LUSC
TCGA-96-8170-01A-11R-2296-07	8	LUSC
TCGA-43-8118-01A-11R-2403-07	8	LUSC
TCGA-46-3765-01A-01R-0980-07	8	LUSC
TCGA-68-A59J-01A-21R-A26W-07	8	LUSC
TCGA-39-5019-01A-01R-1820-07	8	LUSC
TCGA-94-7557-01A-11R-2125-07	8	LUSC
TCGA-NC-A5HP-01A-11R-A26W-07	8	LUSC
TCGA-LA-A446-01A-21R-A24Z-07	8	LUSC
TCGA-77-8136-01A-11R-2247-07	8	LUSC
TCGA-63-A5M9-01A-11R-A26W-07	8	LUSC
TCGA-22-1011-01A-01R-0692-07	8	LUSC
TCGA-18-3407-01A-01R-0980-07	8	LUSC
TCGA-34-5928-01A-11R-1820-07	8	LUSC
TCGA-77-A5GH-01A-11R-A27Q-07	8	LUSC
TCGA-85-7696-01A-11R-2125-07	8	LUSC
TCGA-77-6844-01A-11R-1949-07	8	LUSC
TCGA-18-3421-01A-01R-0980-07	8	LUSC
TCGA-43-3394-01A-01R-0980-07	8	LUSC
TCGA-NK-A5CX-01A-11R-A26W-07	8	LUSC
TCGA-18-4721-01A-01R-1443-07	8	LUSC
TCGA-77-6842-01A-11R-1949-07	8	LUSC
TCGA-46-3768-01A-01R-0980-07	8	LUSC
TCGA-58-8390-01A-11R-2326-07	8	LUSC
TCGA-XC-AA0X-01A-32R-A405-07	8	LUSC
TCGA-39-5040-01A-21R-2125-07	8	LUSC
TCGA-NC-A5HL-01A-11R-A26W-07	8	LUSC
TCGA-56-8308-01A-11R-2296-07	8	LUSC
TCGA-39-5021-01A-01R-1443-07	8	LUSC
TCGA-77-7335-01A-11R-2045-07	8	LUSC
TCGA-60-2711-01A-01R-0851-07	8	LUSC
TCGA-66-2780-01A-01R-0851-07	8	LUSC
TCGA-21-5782-01A-01R-1635-07	8	LUSC
TCGA-51-6867-01A-11R-2045-07	8	LUSC
TCGA-63-5131-01A-01R-1443-07	8	LUSC
TCGA-21-1071-01A-01R-0692-07	8	LUSC
TCGA-56-7222-01A-11R-2045-07	8	LUSC
TCGA-66-2790-01A-01R-0980-07	8	LUSC
TCGA-56-5897-01A-11R-1635-07	8	LUSC
TCGA-37-3792-01A-01R-0980-07	8	LUSC
TCGA-18-5595-01A-01R-1635-07	9	LUSC
TCGA-66-2783-01A-01R-1201-07	9	LUSC
TCGA-33-6738-01A-11R-1949-07	9	LUSC
TCGA-43-7658-01A-11R-2125-07	9	LUSC
TCGA-37-4133-01A-01R-1100-07	9	LUSC
TCGA-90-7766-01A-21R-2125-07	9	LUSC
TCGA-43-6647-01A-11R-1820-07	9	LUSC
TCGA-39-5024-01A-21R-1820-07	9	LUSC
TCGA-33-AASI-01A-22R-A405-07	9	LUSC
TCGA-18-3414-01A-01R-0980-07	9	LUSC
TCGA-43-2576-01A-01R-A32Z-07	9	LUSC
TCGA-18-4086-01A-01R-1100-07	9	LUSC
TCGA-63-7023-01A-11R-1949-07	9	LUSC
TCGA-22-5474-01A-01R-1635-07	9	LUSC
TCGA-63-A5MG-01A-12R-A27Q-07	9	LUSC
TCGA-21-1082-01A-01R-0692-07	9	LUSC
TCGA-77-7338-01A-11R-2045-07	9	LUSC
TCGA-51-4079-01A-01R-1100-07	9	LUSC
TCGA-34-7107-01A-11R-1949-07	9	LUSC
TCGA-85-8049-01A-11R-2247-07	9	LUSC
TCGA-94-A5I4-01A-11R-A26W-07	9	LUSC
TCGA-66-2793-01A-01R-1201-07	9	LUSC
TCGA-85-8277-01A-11R-2296-07	9	LUSC
TCGA-85-7710-01A-11R-2125-07	9	LUSC
TCGA-77-8140-01A-11R-2247-07	9	LUSC
TCGA-22-5473-01A-01R-1635-07	9	LUSC
TCGA-21-1080-01A-01R-0692-07	9	LUSC
TCGA-34-8456-01A-21R-2326-07	9	LUSC
TCGA-39-5031-01A-01R-1443-07	9	LUSC
TCGA-63-A5ML-01A-31R-A27Q-07	9	LUSC
TCGA-66-2788-01A-01R-0980-07	9	LUSC
TCGA-56-8504-01A-11R-2403-07	9	LUSC
TCGA-56-8503-01A-11R-2403-07	9	LUSC
TCGA-34-5929-01A-11R-1820-07	9	LUSC
TCGA-66-2785-01A-01R-0851-07	9	LUSC
TCGA-18-3417-01A-01R-1443-07	9	LUSC
TCGA-56-7730-01A-11R-2125-07	9	LUSC
TCGA-56-1622-01A-01R-0692-07	9	LUSC
TCGA-68-7757-01B-11R-2296-07	9	LUSC
TCGA-77-A5GA-01A-11R-A27Q-07	9	LUSC
TCGA-85-A53L-01A-21R-A26W-07	9	LUSC
TCGA-18-3408-01A-01R-0980-07	9	LUSC
TCGA-NC-A5HQ-01A-11R-A26W-07	9	LUSC
TCGA-56-8201-01A-11R-2247-07	9	LUSC
TCGA-33-AAS8-01A-11R-A405-07	9	LUSC
TCGA-85-8580-01A-31R-2403-07	9	LUSC
TCGA-68-A59I-01A-11R-A262-07	9	LUSC
TCGA-85-7698-01A-11R-2125-07	9	LUSC
TCGA-O2-A52N-01A-11R-A26W-07	9	LUSC
TCGA-22-4607-01A-01R-1201-07	9	LUSC
TCGA-37-4141-01A-02R-1100-07	9	LUSC
TCGA-22-4613-01A-01R-1443-07	9	LUSC
TCGA-56-A4BW-01A-11R-A24H-07	9	LUSC
TCGA-60-2703-01A-11R-2045-07	9	LUSC
TCGA-56-8082-01A-11R-2247-07	9	LUSC
TCGA-98-8020-01A-11R-2247-07	9	LUSC
TCGA-92-8064-01A-11R-2247-07	9	LUSC
TCGA-85-A511-01A-21R-A262-07	9	LUSC
TCGA-39-5034-01A-01R-1443-07	9	LUSC
TCGA-66-2787-01A-01R-0980-07	9	LUSC
TCGA-39-5016-01A-01R-1443-07	9	LUSC
TCGA-77-6845-01A-11R-1949-07	9	LUSC
TCGA-68-8251-01A-11R-2296-07	9	LUSC
TCGA-77-7141-01A-11R-2045-07	9	LUSC
TCGA-66-2781-01A-01R-0851-07	9	LUSC
TCGA-77-8150-01A-11R-2247-07	9	LUSC
TCGA-39-5027-01A-21R-1820-07	9	LUSC
TCGA-90-A59Q-01A-11R-A26W-07	9	LUSC
TCGA-22-4595-01A-01R-1201-07	9	LUSC
TCGA-77-8008-01A-21R-2187-07	9	LUSC
TCGA-33-4586-01A-01R-1443-07	9	LUSC
TCGA-63-A5MI-01A-12R-A27Q-07	9	LUSC
TCGA-NC-A5HE-01A-11R-A26W-07	9	LUSC
TCGA-92-8063-01A-11R-2247-07	9	LUSC
TCGA-34-2600-01A-01R-0851-07	9	LUSC
TCGA-63-A5MV-01A-21R-A26W-07	9	LUSC
TCGA-60-2726-01A-01R-0851-07	9	LUSC
TCGA-39-5028-01A-01R-1443-07	9	LUSC
TCGA-94-7033-01A-11R-1949-07	9	LUSC
TCGA-43-7656-01A-11R-2125-07	9	LUSC
TCGA-34-5240-01A-01R-1443-07	9	LUSC
TCGA-77-A5G7-01B-11R-A27Q-07	9	LUSC
TCGA-56-7822-01A-11R-2125-07	9	LUSC
TCGA-77-7463-01A-11R-2045-07	9	LUSC
TCGA-43-A56V-01A-11R-A26W-07	9	LUSC
TCGA-37-4132-01A-01R-1100-07	9	LUSC
TCGA-98-A53A-01A-11R-A262-07	9	LUSC
TCGA-85-8582-01A-21R-2403-07	9	LUSC
TCGA-58-8387-01A-11R-2296-07	9	LUSC
TCGA-56-8622-01A-11R-2403-07	9	LUSC
TCGA-77-8156-01A-11R-2247-07	9	LUSC
TCGA-37-4135-01A-01R-1100-07	9	LUSC
TCGA-33-4532-01A-01R-1201-07	9	LUSC
TCGA-39-5036-01A-01R-1443-07	9	LUSC
TCGA-63-A5MM-01A-11R-A26W-07	9	LUSC
TCGA-60-2713-01A-01R-0851-07	9	LUSC
TCGA-94-8035-01A-11R-2247-07	9	LUSC
TCGA-43-3920-01A-01R-0980-07	9	LUSC
TCGA-O2-A52W-01A-11R-A26W-07	9	LUSC
TCGA-85-A50Z-01A-21R-A262-07	9	LUSC
TCGA-18-3412-01A-01R-0980-07	9	LUSC
TCGA-77-6843-01A-11R-1949-07	9	LUSC
TCGA-77-8154-01A-11R-2247-07	9	LUSC
TCGA-77-A5G8-01B-11R-A27Q-07	9	LUSC
TCGA-56-7580-01A-11R-2045-07	9	LUSC
TCGA-85-8354-01A-31R-2326-07	9	LUSC
TCGA-18-4083-01A-01R-1100-07	9	LUSC
TCGA-77-8145-01A-11R-2247-07	9	LUSC
TCGA-60-2716-01A-01R-0851-07	9	LUSC
TCGA-18-3415-01A-01R-0980-07	9	LUSC
TCGA-34-5927-01A-11R-1820-07	9	LUSC
TCGA-60-2721-01A-01R-0851-07	10	LUSC
TCGA-96-7544-01A-11R-2045-07	10	LUSC
TCGA-58-A46L-01A-11R-A24H-07	10	LUSC
TCGA-66-2778-01A-02R-0851-07	10	LUSC
TCGA-21-5786-01A-01R-1635-07	10	LUSC
TCGA-33-4538-01A-01R-1201-07	10	LUSC
TCGA-21-1083-01A-01R-0692-07	10	LUSC
TCGA-NK-A5CT-01A-31R-A26W-07	10	LUSC
TCGA-58-8391-01A-11R-2326-07	10	LUSC
TCGA-58-8392-01A-11R-2326-07	10	LUSC
TCGA-O2-A52V-01A-31R-A262-07	10	LUSC
TCGA-46-6025-01A-11R-1820-07	10	LUSC
TCGA-NC-A5HM-01A-12R-A26W-07	10	LUSC
TCGA-33-AASB-01A-11R-A405-07	10	LUSC
TCGA-85-7843-01A-11R-2125-07	10	LUSC
TCGA-22-0944-01A-01R-0692-07	10	LUSC
TCGA-22-5483-01A-01R-1820-07	10	LUSC
TCGA-77-8133-01A-12R-2247-07	10	LUSC
TCGA-22-4593-01A-21R-1820-07	10	LUSC
TCGA-63-5128-01A-01R-1443-07	10	LUSC
TCGA-34-A5IX-01A-12R-A27Q-07	10	LUSC
TCGA-46-3769-01A-01R-0980-07	10	LUSC
TCGA-58-A46K-01A-11R-A24H-07	10	LUSC
TCGA-85-8288-01A-11R-2296-07	10	LUSC
TCGA-85-6560-01A-11R-1820-07	10	LUSC
TCGA-85-8481-01A-11R-2326-07	10	LUSC
TCGA-56-8305-01A-11R-2296-07	10	LUSC
TCGA-51-4080-01A-01R-1100-07	10	LUSC
TCGA-90-6837-01A-11R-1949-07	10	LUSC
TCGA-85-7950-01A-11R-2187-07	10	LUSC
TCGA-NK-A5D1-01A-11R-A26W-07	10	LUSC
TCGA-46-6026-01A-11R-1820-07	10	LUSC
TCGA-18-3406-01A-01R-0980-07	10	LUSC
TCGA-34-5231-01A-21R-1820-07	10	LUSC
TCGA-56-A5DR-01A-11R-A27Q-07	10	LUSC
TCGA-22-4599-01A-01R-1443-07	10	LUSC
TCGA-33-A5GW-01A-11R-A27Q-07	10	LUSC
TCGA-33-A4WN-01A-11R-A262-07	10	LUSC
TCGA-85-7699-01A-11R-2125-07	10	LUSC
TCGA-77-8130-01A-11R-2247-07	10	LUSC
TCGA-18-3410-01A-01R-0980-07	10	LUSC
TCGA-22-5479-01A-31R-1949-07	10	LUSC
TCGA-NC-A5HR-01A-21R-A26W-07	10	LUSC
TCGA-21-1081-01A-01R-0692-07	10	LUSC
TCGA-56-8629-01A-11R-2403-07	10	LUSC
TCGA-43-6143-01A-11R-1820-07	10	LUSC
TCGA-33-4587-01A-11R-2125-07	10	LUSC
TCGA-85-7697-01A-11R-2125-07	10	LUSC
TCGA-NC-A5HT-01A-11R-A26W-07	10	LUSC
TCGA-60-2708-01A-01R-0851-07	10	LUSC
TCGA-NC-A5HF-01A-11R-A26W-07	10	LUSC
TCGA-56-7221-01A-11R-2045-07	10	LUSC
TCGA-85-A4CL-01A-41R-A26W-07	10	LUSC
TCGA-56-A4ZK-01A-11R-A262-07	10	LUSC
TCGA-21-1078-01A-01R-0692-07	10	LUSC
TCGA-22-5471-01A-01R-1635-07	10	LUSC
TCGA-34-5236-01A-21R-1820-07	10	LUSC
TCGA-37-A5EN-01A-21R-A26W-07	10	LUSC
TCGA-56-8304-01A-11R-2326-07	10	LUSC
TCGA-O2-A52Q-01A-11R-A26W-07	10	LUSC
TCGA-77-8143-01A-11R-2247-07	10	LUSC
TCGA-66-2759-01A-01R-0851-07	10	LUSC
TCGA-18-3411-01A-01R-0980-07	10	LUSC
TCGA-96-A4JK-01A-11R-A24Z-07	10	LUSC
TCGA-22-5481-01A-31R-1949-07	10	LUSC
TCGA-85-A5B5-01A-21R-A26W-07	10	LUSC
TCGA-22-1012-01A-01R-0692-07	10	LUSC
TCGA-85-A512-01A-11R-A26W-07	10	LUSC
TCGA-66-2766-01A-01R-0851-07	10	LUSC
TCGA-33-4566-01A-01R-1443-07	10	LUSC
TCGA-37-3789-01A-01R-0980-07	10	LUSC
TCGA-77-7337-01A-21R-2045-07	10	LUSC
TCGA-66-2792-01A-01R-0980-07	10	LUSC
TCGA-66-2755-01A-01R-0851-07	10	LUSC
TCGA-63-7021-01A-11R-1949-07	10	LUSC
TCGA-22-4604-01A-01R-1201-07	10	LUSC
TCGA-77-A5GB-01B-11R-A27Q-07	10	LUSC
TCGA-33-4582-01A-01R-1443-07	10	LUSC
TCGA-90-7767-01A-11R-2125-07	11	LUSC
TCGA-NC-A5HI-01A-11R-A26W-07	11	LUSC
TCGA-21-1072-01A-01R-0692-07	11	LUSC
TCGA-90-A4ED-01A-31R-A24Z-07	11	LUSC
TCGA-NK-A5CR-01A-11R-A26W-07	11	LUSC
TCGA-21-1075-01A-01R-0692-07	11	LUSC
TCGA-63-A5MR-01A-31R-A27Q-07	11	LUSC
TCGA-98-A538-01A-11R-A262-07	11	LUSC
TCGA-77-7138-01A-41R-2045-07	11	LUSC
TCGA-77-A5GF-01A-21R-A27Q-07	11	LUSC
TCGA-77-8128-01A-11R-2247-07	11	LUSC
TCGA-66-2756-01A-01R-0851-07	11	LUSC
TCGA-56-8083-01A-11R-2247-07	11	LUSC
TCGA-56-8307-01A-11R-2296-07	11	LUSC
TCGA-O2-A5IB-01A-11R-A27Q-07	11	LUSC
TCGA-66-2754-01A-01R-0980-07	11	LUSC
TCGA-21-5783-01A-41R-2187-07	11	LUSC
TCGA-94-A4VJ-01A-11R-A24Z-07	11	LUSC
TCGA-37-3783-01A-01R-1201-07	11	LUSC
TCGA-94-A5I6-01A-21R-A27Q-07	11	LUSC
TCGA-85-8666-01A-11R-2403-07	11	LUSC
TCGA-51-4081-01A-01R-1100-07	11	LUSC
TCGA-77-A5G3-01A-31R-A27Q-07	11	LUSC
TCGA-37-A5EM-01A-21R-A27Q-07	11	LUSC
TCGA-85-8664-01A-11R-2403-07	11	LUSC
TCGA-85-A4JC-01A-11R-A24Z-07	11	LUSC
TCGA-77-8139-01A-11R-2247-07	11	LUSC
TCGA-NK-A7XE-01A-12R-A405-07	11	LUSC
TCGA-33-4583-01A-01R-1443-07	11	LUSC
TCGA-22-5482-01A-01R-1635-07	11	LUSC
TCGA-52-7810-01A-11R-2125-07	11	LUSC
TCGA-56-7223-01A-11R-2045-07	11	LUSC
TCGA-18-5592-01A-01R-1635-07	11	LUSC
TCGA-92-8065-01A-11R-2247-07	11	LUSC
TCGA-98-A53I-01A-31R-A262-07	11	LUSC
TCGA-L3-A524-01A-11R-A262-07	11	LUSC
TCGA-39-5037-01A-01R-1443-07	11	LUSC
TCGA-37-5819-01A-01R-1635-07	11	LUSC
TCGA-33-4533-01A-01R-1201-07	11	LUSC
TCGA-63-A5MH-01A-12R-A27Q-07	11	LUSC
TCGA-63-A5MW-01A-11R-A26W-07	11	LUSC
TCGA-56-7582-01A-11R-2045-07	11	LUSC
TCGA-98-A53J-01A-11R-A26W-07	11	LUSC
TCGA-60-2722-01A-01R-0851-07	11	LUSC
TCGA-NC-A5HK-01A-11R-A26W-07	11	LUSC
TCGA-66-2768-01A-01R-0851-07	11	LUSC
TCGA-85-A4JB-01A-51R-A262-07	11	LUSC
TCGA-22-5491-01A-01R-1635-07	11	LUSC
TCGA-92-7341-01A-31R-2045-07	11	LUSC
TCGA-43-7657-01A-31R-2125-07	12	LUSC
TCGA-O2-A52S-01A-11R-A262-07	12	LUSC
TCGA-56-A62T-01A-11R-A405-07	12	LUSC
TCGA-77-7139-01A-11R-2045-07	12	LUSC
TCGA-43-5670-01A-21R-2125-07	12	LUSC
TCGA-85-A4QQ-01A-41R-A262-07	12	LUSC
TCGA-33-AASJ-01A-11R-A405-07	12	LUSC
TCGA-21-A5DI-01A-31R-A26W-07	12	LUSC
TCGA-77-8153-01A-11R-2403-07	12	LUSC
TCGA-J1-A4AH-01A-31R-A24H-07	12	LUSC
TCGA-77-8148-01A-11R-2247-07	12	LUSC
TCGA-NC-A5HD-01A-11R-A26W-07	12	LUSC
TCGA-56-7823-01B-11R-2247-07	12	LUSC
TCGA-77-8009-01A-11R-2187-07	12	LUSC
TCGA-85-8352-01A-31R-2326-07	12	LUSC
TCGA-85-8479-01A-11R-2326-07	12	LUSC
TCGA-85-8070-01A-11R-2247-07	12	LUSC
TCGA-85-8071-01A-11R-2247-07	12	LUSC
TCGA-NC-A5HH-01A-11R-A26W-07	12	LUSC
TCGA-63-A5MJ-01A-11R-A27Q-07	12	LUSC
TCGA-85-A4CN-01A-11R-A24H-07	12	LUSC
TCGA-NC-A5HO-01A-11R-A26W-07	12	LUSC
TCGA-85-6798-01A-11R-1949-07	12	LUSC
TCGA-21-1079-01A-01R-0692-07	12	LUSC
TCGA-18-3419-01A-01R-0980-07	12	LUSC
TCGA-18-3416-01A-01R-0980-07	12	LUSC
TCGA-85-A4QR-01A-11R-A24Z-07	12	LUSC
[truncated: 6,547 more rows]

## Sheet: Data 5
Supplementary Data 5. Correlations between ITH scores from seven different methods within individual cancer types
Note: The red color indicates a positive correlation and the blue color a negative correlation (Spearman's correlation test, FDR < 0.05); ρ: correlation coefficient.
DEPTH vs. tITH			DEPTH vs. sITH			DEPTH vs. EXPANDS			DEPTH vs. PhyloWGS			DEPTH vs. MATH			DEPTH vs. ABSOLUTE
Cancer type	ρ	FDR	Cancer type	ρ	FDR	Cancer type	ρ	FDR	Cancer type	ρ	FDR	Cancer type	ρ	FDR	Cancer type	ρ	FDR
BLCA	0.781765	0	BLCA	0.417641	0	STAD	0.358308	0.000175531	PRAD	0.475491	2.0137e-09	BRCA	0.257325	1.01059e-14	BRCA	0.18715	2.22435e-07
BRCA	0.89332	0	CESC	0.458461	0	LUSC	0.307397	0.0219401	BRCA	0.182625	6.9703e-07	LUAD	0.323713	1.22646e-12	STAD	0.20404	0.00357261
CESC	0.901628	0	GBM	0.712287	0	SKCM	0.36274	0.0301443	HNSC	0.151885	0.0106174	LUSC	0.192139	0.000173548	LUAD	0.171534	0.00318335
COAD	0.697115	0	LIHC	0.577971	0	THCA	0.279745	0.0964503	PAAD	0.323835	0.0141199	STAD	0.188776	0.000828302	LUSC	0.132487	0.0363603
ESCA	0.705502	0	LUAD	0.628461	0	BLCA	0.192818	0.0896351	KICH	0.366378	0.0176834	COAD	-0.223168	0.000902723	COAD	-0.174866	0.0373077
GBM	0.861547	0	LUSC	0.612868	0	PRAD	0.190893	0.125294	KIRC	0.141633	0.035675	PAAD	0.254956	0.0113027	ACC	0.286761	0.0579394
HNSC	0.661706	0	PRAD	0.582484	0	KIRC	0.208383	0.154712	LUSC	0.145823	0.0565464	LIHC	0.136801	0.0352259	PAAD	0.198392	0.0686477
KICH	0.707588	0	THCA	0.444101	0	LUAD	0.177284	0.172568	OV	-0.161789	0.10352	PRAD	0.110626	0.053164	LIHC	0.104092	0.211413
KIRC	0.768949	0	BRCA	0.601222	2.06295e-107	HNSC	0.0941227	0.285405	LUAD	0.129332	0.157107	CESC	-0.115374	0.145909	UCEC	0.102688	0.214568
KIRP	0.742198	0	HNSC	0.340944	3.35272e-15	CESC	0.121505	0.558451	CESC	-0.305603	0.20092	BLCA	0.0941213	0.14528	SKCM	0.0832994	0.253365
LAML	0.579386	0	KIRC	0.324546	3.59842e-14	GBM	0.0499463	0.765863	STAD	0.104256	0.248828	KIRC	0.101955	0.143453	CESC	-0.284557	0.233795
LIHC	0.534784	0	PAAD	0.412984	2.29309e-08				LIHC	-0.168545	0.320012	CHOL	0.265266	0.257159	OV	-0.0788733	0.385497
LUAD	0.768321	0	COAD	0.27832	3.01716e-06				COAD	-0.101273	0.358496	KIRP	-0.092146	0.239637	PRAD	0.0626864	0.461722
LUSC	0.813498	0	READ	0.382292	0.00022388				SKCM	0.0821015	0.40677	LAML	-0.132999	0.372912	ESCA	0.0939319	0.445908
OV	0.757848	0	KICH	0.365578	0.00323131				UCEC	0.116132	0.399824	KICH	0.152797	0.372887	BLCA	0.0814326	0.55603
PAAD	0.717588	0	CHOL	0.240412	0.177114				ACC	0.131792	0.409898	READ	-0.129308	0.350073	TGCT	0.0763024	0.583965
PRAD	0.782393	0	SKCM	-0.0938031	0.370816				CHOL	0.180175	0.413665	THCA	-0.0549679	0.430807	HNSC	0.032954	0.685703
READ	0.709558	0	KIRP	0.0377775	0.554322				TGCT	-0.0638847	0.611059	TGCT	0.0685227	0.615945	THCA	0.0524104	0.673214
SKCM	0.818787	0							BLCA	-0.0607722	0.606982	OV	-0.0521238	0.593482	READ	-0.0561225	0.799708
STAD	0.64706	0							LAML	-0.126229	0.741249	HNSC	-0.0271627	0.683206	KICH	0.0495318	0.877788
TGCT	0.692935	0							ESCA	-0.0267853	0.854198	GBM	-0.0492835	0.654968	CHOL	-0.0282443	1.04287
THCA	0.553384	0							THCA	-0.0237631	0.862763	ACC	-0.068298	0.632901	LAML	0.010653	1.05652
UCEC	0.683604	0							GBM	0.0108681	0.947713	ESCA	-0.0322932	0.724621	KIRP	-0.00141749	1.06735
ACC	0.587658	2.48593e-08							KIRP	-0.000863024	0.993097	UCEC	-0.0218184	0.709566	GBM	-0.00172346	1.02463
CHOL	0.761133	5.52666e-07										SKCM	0.000774414	0.986784	KIRC	0.000611834	0.990122
tITH vs. sITH			tITH vs. EXPANDS			tITH vs. PhyloWGS			tITH vs. MATH			tITH vs. ABSOLUTE
Cancer type	ρ	FDR	Cancer type	ρ	FDR	Cancer type	ρ	FDR	Cancer type	ρ	FDR	Cancer type	ρ	FDR
GBM	0.606835	0	STAD	0.286388	0.00726969	BRCA	0.168849	1.31196e-05	LUAD	0.305014	6.82296e-11	BRCA	0.168705	5.6973e-06
LUAD	0.380122	0	LUSC	0.354132	0.00452346	PRAD	0.323897	0.000234666	BRCA	0.196992	7.7672e-09	LUSC	0.159373	0.0110852
LUSC	0.538296	0	SKCM	0.30006	0.112483	PAAD	0.3936	0.00141913	LUSC	0.216613	1.25534e-05	LUAD	0.143693	0.0248978
BRCA	0.49058	3.46116e-66	LUAD	0.211232	0.184246	LUSC	0.148723	0.0866578	PAAD	0.390539	1.80142e-05	THCA	0.200872	0.0428422
PRAD	0.3416	2.41004e-14	KIRC	0.197541	0.258868	THCA	0.212161	0.0798593	COAD	-0.262004	4.97341e-05	COAD	-0.165363	0.0573554
CESC	0.406163	6.96899e-13	CESC	0.194519	0.524432	KIRC	0.116683	0.125916	UCEC	-0.167632	0.00616353	PAAD	0.211268	0.0522513
PAAD	0.484778	1.43419e-11	PRAD	0.11028	0.464091	OV	-0.141472	0.222632	HNSC	-0.127843	0.0156708	ACC	0.273771	0.0681922
BLCA	0.201896	9.31233e-05	BLCA	0.0896443	0.47444	KICH	0.22311	0.251774	PRAD	0.119632	0.030692	PRAD	0.101522	0.177201
THCA	0.15863	0.000826346	GBM	0.100223	0.671463	LUAD	0.11282	0.266036	ACC	-0.223869	0.144649	STAD	0.0930186	0.280571
KIRP	0.0824321	0.353717	THCA	0.0787941	0.616172	CHOL	0.270524	0.265293	CESC	-0.103021	0.20907	TGCT	-0.124266	0.366151
KICH	0.157165	0.33882	HNSC	-0.011636	0.883163	CESC	-0.281592	0.245203	GBM	-0.132055	0.246262	ESCA	0.105303	0.446947
LIHC	-0.0606102	0.368029				UCEC	0.148598	0.280157	SKCM	-0.0745468	0.229849	CESC	-0.200351	0.533148
KIRC	0.0412171	0.474349				LIHC	-0.143221	0.430971	CHOL	0.255182	0.266868	OV	-0.0676138	0.492448
HNSC	0.0209094	0.816205				LAML	-0.294879	0.402643	LIHC	-0.0742544	0.290533	CHOL	-0.192362	0.506254
READ	0.049342	0.765614				TGCT	-0.0957944	0.424767	KIRP	-0.0755694	0.346856	LIHC	0.0574748	0.523183
SKCM	-0.0254863	0.89997				HNSC	0.0515091	0.418197	READ	-0.127892	0.358114	KICH	0.122229	0.537414
CHOL	-0.0226512	0.9484				SKCM	0.0496947	0.670419	KIRC	-0.0621408	0.379621	BLCA	0.0743057	0.555563
COAD	0.00407096	0.94561				STAD	0.0358237	0.78404	LAML	-0.119199	0.361701	GBM	0.0645462	0.614065
						BLCA	-0.0445985	0.763979	OV	-0.0606443	0.500615	KIRC	-0.0324476	0.672787
						ESCA	0.0340376	0.818801	KICH	0.101617	0.524528	UCEC	0.0317928	0.731561
						ACC	0.0483237	0.787448	THCA	-0.0418485	0.504133	HNSC	0.0189945	0.803084
						KIRP	0.023637	0.886539	TGCT	-0.0684407	0.504576	READ	-0.0391857	0.81839
						COAD	-0.018345	0.849939	STAD	-0.0231274	0.698488	LAML	0.0410514	0.797745
						GBM	0.000240723	0.997963	ESCA	-0.00930687	0.93878	SKCM	0.0133908	0.825631
									BLCA	-0.00410819	0.934231	KIRP	0.0133283	0.831611
sITH vs. EXPANDS			sITH vs. PhyloWGS			sITH vs. MATH			sITH vs. ABSOLUTE
Cancer type	ρ	FDR	Cancer type	ρ	FDR	Cancer type	ρ	FDR	Cancer type	ρ	FDR
LUSC	0.44818	0.000150966	BRCA	0.148049	0.000185824	BRCA	0.284116	3.59746e-18	LUAD	0.198557	0.000682762
BLCA	0.353179	0.000622694	PRAD	0.315296	0.000265659	LUAD	0.326197	5.25083e-13	LIHC	0.217829	0.00102302
HNSC	0.25104	0.00423991	KICH	0.426724	0.00322579	LUSC	0.249253	1.73491e-07	BRCA	0.115248	0.00271649
LUAD	0.343724	0.00591331	LUAD	0.214695	0.00632726	BLCA	0.246036	2.46004e-06	KIRC	0.134829	0.0290995
PRAD	0.161615	0.247561	PAAD	0.329719	0.00581406	LIHC	0.232248	3.52206e-05	BLCA	0.20814	0.0479268
CESC	0.243938	0.297466	LUSC	0.129408	0.0894604	KIRC	0.236694	3.90216e-05	LUSC	0.094	0.161148
GBM	0.147634	0.537724	HNSC	0.0827081	0.185197	PAAD	0.32449	0.000304718	PRAD	0.0810228	0.349238
THCA	0.11157	0.510825	COAD	-0.128108	0.197929	COAD	0.18081	0.00577779	PAAD	0.128639	0.308369
KIRC	-0.0979274	0.490444	BLCA	0.122856	0.271375	UCEC	0.157719	0.0843704	COAD	0.0894344	0.364647
SKCM	-0.0378526	0.798392	KIRC	0.064178	0.379535	HNSC	0.0820658	0.128341	SKCM	0.11065	0.573681
			LIHC	-0.106259	0.549524	KICH	0.163724	0.331718	GBM	0.0832799	0.557445
			THCA	-0.0614268	0.6546	SKCM	0.129742	0.306201	THCA	-0.0718582	0.526259
			GBM	-0.0617191	0.630525	PRAD	0.0537395	0.360922	UCEC	0.0654852	0.705929
			CHOL	0.0984436	0.648983	KIRP	0.0691635	0.387705	CESC	-0.120119	0.676694
			CESC	-0.0989013	0.62291	THCA	-0.0520847	0.399125	KIRP	-0.0422528	0.678741
			KIRP	0.0450881	0.67304	GBM	0.0674769	0.490583	READ	0.051885	0.751887
						CHOL	0.120168	0.547896	HNSC	-0.0147985	0.830513
						CESC	0.0323923	0.618597	KICH	-0.0293914	0.866194
						READ	0.0108138	0.918863	CHOL	0.0319211	0.860021
EXPANDS vs. PhyloWGS			EXPANDS vs. MATH			EXPANDS vs. ABSOLUTE
Cancer type	ρ	FDR	Cancer type	ρ	FDR	Cancer type	ρ	FDR
LUSC	0.610653	0.00737738	LUSC	0.276989	0.113062	HNSC	-0.278883	0.00358646
LUAD	0.275146	0.296572	BLCA	0.182914	0.288642	KIRC	-0.242371	0.32911
HNSC	0.138466	0.280837	PRAD	-0.175616	0.365679	LUSC	0.175586	0.493362
KIRC	0.191115	0.294132	THCA	-0.198486	0.402344	CESC	0.275999	0.404989
BLCA	0.139194	0.344366	STAD	-0.077416	0.784041	BLCA	0.15835	0.336103
PRAD	0.106487	0.471261	LUAD	0.103754	0.682797	PRAD	-0.145159	0.334323
GBM	0.181031	0.612208	HNSC	-0.0482401	0.847955	LUAD	0.143977	0.357632
CESC	0.0661458	0.738063	CESC	0.0962377	0.825419	STAD	-0.0880939	0.408616
			KIRC	0.0327619	0.978309	GBM	-0.0827847	0.513525
			SKCM	-0.0211859	0.968342	THCA	-0.0618052	0.857302
			GBM	0.00635161	0.950248	SKCM	-0.0421305	0.78101
PhyloWGS vs. MATH			PhyloWGS vs. ABSOLUTE
Cancer type	ρ	FDR	Cancer type	ρ	FDR
LUSC	0.483654	1.11341e-15	BRCA	0.36375	1.77663e-27
LUAD	0.497704	1.37094e-13	LUAD	0.644413	2.00847e-25
BRCA	0.225599	8.24479e-10	HNSC	0.432682	3.4516e-20
HNSC	0.291202	2.2825e-09	STAD	0.529117	3.15899e-18
STAD	0.330268	6.53234e-07	OV	0.567752	1.3057e-14
SKCM	0.353797	5.52351e-07	KIRC	0.461084	2.20166e-14
BLCA	0.350483	8.59187e-05	LUSC	0.469826	1.93342e-13
PRAD	0.317708	9.09624e-05	BLCA	0.540269	2.38984e-11
KIRC	0.212282	0.000539273	ACC	0.504395	3.61232e-06
THCA	0.327418	0.00138352	THCA	0.336225	0.000250467
TGCT	0.265284	0.00479252	CESC	0.597924	0.000519564
PAAD	0.320957	0.00833854	LIHC	0.413033	0.00169773
CHOL	0.439599	0.0152024	COAD	0.190633	0.0230898
CESC	0.4443	0.0164361	PAAD	0.258687	0.0429062
LIHC	0.299021	0.0180886	PRAD	0.145653	0.0965791
ACC	0.258737	0.0332669	SKCM	0.12748	0.132186
LAML	0.648485	0.0692367	KICH	0.170007	0.268567
KIRP	0.187738	0.0801417	LAML	0.407076	0.285366
COAD	0.111026	0.188813	GBM	0.106807	0.310237
ESCA	0.116279	0.191176	KIRP	0.101696	0.389005
UCEC	-0.0919162	0.420614	TGCT	0.0774022	0.431652
OV	0.068166	0.406761	CHOL	0.133504	0.500607
GBM	0.0627272	0.51388	UCEC	-0.0605774	0.573253
KICH	0.0518996	0.691197	ESCA	0.0313598	0.725287
MATH vs. ABSOLUTE
Cancer type	ρ	FDR
COAD	0.657521	8.02377e-42
LUAD	0.55981	2.5102e-35
LUSC	0.530355	3.88563e-31
BRCA	0.388095	4.14212e-31
STAD	0.53242	2.0401e-24
HNSC	0.44557	2.89055e-24
UCEC	0.475364	1.90751e-23
BLCA	0.582788	5.6629e-14
READ	0.588805	1.7678e-12
LIHC	0.293388	4.31515e-07
SKCM	0.223559	1.93748e-05
GBM	0.192679	0.000542454
PAAD	0.311515	0.000532732
KIRC	0.209728	0.00147784
THCA	0.219561	0.010952
KIRP	0.166266	0.0129772
CESC	0.37457	0.0427474
KICH	-0.247735	0.0725227
ESCA	0.128752	0.146741
PRAD	0.0697345	0.241346
OV	0.0595272	0.274769
LAML	0.141344	0.339501
TGCT	0.0920842	0.338114
ACC	0.0616245	0.609072
CHOL	-0.00219941	0.991209

## Sheet: Data 6
Supplementary Data 6. Association between ITH scores from seven different methods and tumor purity within individual cancer types
Note: The red color indicates a positive correlation and the blue color a negative correlation (Spearman's correlation test, FDR < 0.05); ρ: correlation coefficient.
DEPTH vs. tumor purity			tITH vs. tumor purity			sITH vs. tumor purity			EXPANDS vs. tumor purity			PhyloWGS vs. tumor purity			MATH vs. tumor purity			ABSOLUTE vs. tumor purity
Cancer type	ρ	FDR	Cancer type	ρ	FDR	Cancer type	ρ	FDR	Cancer type	ρ	FDR	Cancer type	ρ	FDR	Cancer type	ρ	FDR	Cancer type	ρ	FDR
BRCA	0.465693	7.67747e-50	BRCA	0.526606	1.41461e-66	LUSC	0.503641	6.93015e-28	HNSC	0.457013	9.53038e-09	OV	-0.42728	3.0795e-07	ESCA	-0.297046	0.00229097	OV	-0.283163	4.32e-10
PRAD	0.649087	1.66219e-42	PRAD	0.583619	1.64722e-32	BRCA	0.259704	6.25208e-15	STAD	0.449583	9.75608e-08	PRAD	0.372909	8.32704e-06	COAD	-0.200741	0.00169482	KIRP	-0.386221	1.65e-09
LUSC	0.447397	9.91567e-22	COAD	0.554879	2.24684e-19	PRAD	0.351349	6.82651e-11	GBM	0.456099	8.65938e-06	KIRP	-0.389938	0.000687544	KIRP	-0.200776	0.00865991	HNSC	-0.252258	8.62e-08
HNSC	0.346901	1.5541e-14	LUSC	0.38154	1.26974e-15	LUAD	0.233291	5.19436e-06	LUSC	0.5022	1.21493e-05	STAD	-0.178858	0.0304589	LIHC	-0.177768	0.0089862	KIRC	-0.252873	1.11e-06
COAD	0.404996	6.54157e-10	LUAD	0.36767	2.04791e-14	KIRC	-0.166511	0.00262459	KIRC	0.493332	0.000101652	LUAD	-0.172344	0.0554819	LUAD	0.124082	0.0435662	BRCA	-0.15742	6.17e-06
UCEC	0.359307	7.35967e-10	KIRC	0.349591	1.14534e-12	BLCA	0.252215	0.00751993	BLCA	0.265874	0.0277279	PAAD	0.226961	0.200844	UCEC	-0.110111	0.0981015	COAD	-0.229695	1.61e-05
LUAD	0.269793	5.70807e-08	HNSC	0.302017	2.64788e-11	UCEC	0.223794	0.0414878	PRAD	0.194124	0.112513	CESC	-0.288394	0.355225	PRAD	0.117419	0.087688	THCA	-0.320678	3.24e-05
OV	0.323722	7.4115e-08	OV	0.299412	7.3429e-07	HNSC	0.102534	0.0541378	LUAD	0.151146	0.277469	BLCA	-0.13622	0.333411	READ	-0.193105	0.0879126	READ	-0.281199	0.00107768
STAD	0.302531	1.39474e-07	READ	0.493908	3.23744e-06	READ	0.242396	0.0500191	THCA	0.247712	0.297231	HNSC	0.07437	0.328447	LAML	-0.275988	0.0987592	ESCA	0.268517	0.00211001
READ	0.505573	1.71702e-06	STAD	0.242236	3.79302e-05	PAAD	0.185776	0.0531589	SKCM	-0.0909309	0.597604	LIHC	0.162479	0.496913	LUSC	0.0944912	0.118495	LUSC	-0.15135	0.00386596
BLCA	0.371548	1.11529e-05	SKCM	0.215132	4.15008e-05	GBM	-0.143422	0.151094	CESC	-0.114483	0.546914	UCEC	-0.124009	0.477773	GBM	-0.0999058	0.125101	KICH	-0.383047	0.00481869
KICH	0.468129	0.00025964	UCEC	0.238851	6.65109e-05	LIHC	-0.0937326	0.156669				COAD	-0.0894362	0.489428	KIRC	-0.110169	0.156745	LAML	-0.309041	0.0098493
KIRC	0.18111	0.0004219	BLCA	0.327259	0.000127316	KICH	0.17055	0.270482				BRCA	0.0352585	0.547714	BLCA	0.1204	0.268915	STAD	-0.148476	0.0132563
SKCM	0.163953	0.00212666	LIHC	0.196925	0.000852624	CHOL	0.156843	0.520315				LUSC	-0.0574654	0.662963	OV	0.0688183	0.276383	UCEC	-0.12328	0.0213514
CESC	0.395534	0.0343187	KICH	0.383561	0.00348115	COAD	0.047472	0.595161				KIRC	0.0486929	0.697767	STAD	-0.0689668	0.33701	LIHC	-0.13871	0.0224012
ESCA	0.153763	0.0915314	ESCA	0.214382	0.0121726	SKCM	0.0676462	0.627923				THCA	-0.0521051	0.838713	KICH	0.141276	0.402054	GBM	-0.0973258	0.0364443
LAML	0.2023	0.133332	PAAD	0.220105	0.0131952	THCA	-0.038401	0.675932				TGCT	0.0470166	0.824424	HNSC	-0.0475447	0.413266	CESC	-0.369387	0.0464039
KIRP	-0.0908512	0.203335	CESC	0.301621	0.115265	CESC	0.0437443	0.85073				CHOL	-0.0923412	0.812374	BRCA	0.0230842	0.660217	CHOL	-0.372241	0.0457012
PAAD	0.116013	0.228717	LAML	0.193224	0.140027	KIRP	-0.012077	0.859275				ESCA	-0.0411966	0.813838	PAAD	-0.0560597	0.653973	ACC	-0.151148	0.220174
ACC	0.122242	0.3786	ACC	0.181741	0.154804							KICH	0.0515708	0.831668	CHOL	0.0733609	0.821285	BLCA	-0.10875	0.243081
LIHC	0.0569287	0.379211	THCA	0.109038	0.167439							ACC	0.0440809	0.793312	THCA	-0.0289779	0.821644	LUAD	-0.060852	0.248139
CHOL	0.142296	0.488139	TGCT	-0.112963	0.201864							LAML	-0.118723	0.794276	CESC	0.0546039	0.825068	PAAD	0.0946302	0.290791
GBM	0.04734	0.62297	CHOL	0.214698	0.250218							SKCM	-0.0230696	0.791522	ACC	0.0243106	0.863995	SKCM	-0.0433675	0.42657
THCA	-0.0337934	0.679639	GBM	0.071273	0.402187							GBM	-0.00966829	0.916531	TGCT	0.0150182	0.866383	TGCT	0.0318034	0.734506
TGCT	0.0346218	0.686848	KIRP	-0.00421708	0.946257													PRAD	0.0175777	0.742073

## Sheet: Data 7
Supplementary Data 7. Correlations of the DEPTH scores calculated by the alternative method (without normal control) with genome instability, clinical features, immune signatures, and tumor purity
Note: The red color indicates a positive correlation and the blue color a negative correlation (Spearman's correlation test or one-sided Mann–Whitney U test, FDR < 0.05); ρ: correlation coefficient.
TMB: tumor mutation burden; HRD: homologous recombination deficiency; HLA: human leukocyte antigen; IFN: interferon response; TILs: Tumor-infiltrating lymphocytes.
Genomic instability
TMB			TP53 mutations		HRD
Cancer type	ρ	FDR	Cancer type	FDR	Cancer type	ρ	FDR
BRCA	0.247888	1.0465e-13	BRCA	3.5e-23	BRCA	0.35235	5.50349e-28
LUSC	0.282699	0.00109691	UCEC	1.47e-05	KIRP	0.495207	5.15147e-17
ESCA	0.211587	0.0196792	KIRP	0.0178333	UCEC	0.358851	9.30243e-11
LUAD	0.127409	0.0236384	KIRC	0.0397709	THCA	0.242893	9.73676e-07
STAD	-0.184553	0.0029079	LIHC	0.036575	PRAD	0.22926	2.99197e-06
KIRP	-0.258644	0.00014085	BLCA	0.0323774	LUAD	0.21568	5.72323e-06
COAD	0.147748	0.120093	GBM	0.0503624	LIHC	0.165379	0.00652589
CESC	-0.146315	0.124057	PRAD	0.0462906	STAD	0.14043	0.0173389
KIRC	0.103713	0.153746	CHOL	0.11445	OV	-0.23341	0.00735584
UCEC	-0.121101	0.151247	CESC	0.407368	COAD	-0.140407	0.0602553
PRAD	0.0757701	0.207291	THCA	0.37447	ACC	0.232867	0.0975744
SKCM	-0.0727829	0.238933	ACC	0.44303	KICH	0.226342	0.145475
ACC	0.176149	0.241188	STAD	0.435956	ESCA	-0.125341	0.243151
THCA	0.0665043	0.247028	LUSC	0.434814	BLCA	0.065039	0.355014
TGCT	0.0939254	0.40584	LAML	0.496759	LUSC	0.0584843	0.348463
GBM	-0.0890284	0.435359	LUAD	0.605805	CESC	-0.0727261	0.362337
HNSC	0.0434843	0.48519	KICH	0.833788	GBM	0.109047	0.352666
OV	0.0588259	0.787615	READ	1.10627	HNSC	0.0529372	0.341731
READ	-0.0543648	0.82866	TGCT	1.13122	LAML	0.0945843	0.440571
LAML	0.0397989	0.856795	SKCM	1.11616	TGCT	-0.0749312	0.465094
LIHC	-0.0208469	0.822136	OV	1.08476	KIRC	0.0316304	0.66589
CHOL	-0.0553838	0.850393	COAD	1.11818	READ	-0.0398058	0.815426
BLCA	-0.011965	0.884298	PAAD	1.08546	SKCM	0.0176852	0.804561
KICH	-0.0140098	0.949066	ESCA	1.04161	PAAD	-0.023604	0.814498
PAAD	0.00335889	0.964508	HNSC	0.999998	CHOL	-0.0445105	0.796588
Clinical features
Overall survival			Tumor grade		Tumor stage		MKI67 Expression			TOP2A Expression			RACGAP1 Expression			Proliferation			Stemness
Cancer type	p value	HR	Cancer type	FDR	Cancer type	FDR	Cancer type	ρ	FDR	Cancer type	ρ	FDR	Cancer type	ρ	FDR	Cancer type	ρ	FDR	Cancer type	ρ	FDR
KIRC	<0.0001	2.83	UCEC	1.67339e-09	KIRP	3.98524e-06	BRCA	0.25266	5.64903e-16	BRCA	0.213027	2.67857e-11	LUAD	0.352715	1.7681e-15	BRCA	0.41456	0	BLCA	0.273301	5.03926e-07
THCA	0.028	7.39	HNSC	5.20705e-08	LIHC	0.000220309	KIRP	0.345388	2.2669e-08	LUAD	0.249933	1.17704e-07	LIHC	0.366778	2.8898e-12	KIRP	0.473228	0	CESC	0.27206	1.86777e-05
UCEC	0.0038	4.33	KIRC	2.48035e-05	KIRC	0.000157412	LIHC	0.303131	2.29839e-08	LIHC	0.253299	6.52228e-06	BRCA	0.216258	2.99559e-12	LUAD	0.336773	3.91607e-14	LUAD	0.209842	1.30743e-05
KIRP	0.0073	4.04	LIHC	0.00131742	UCEC	0.00221006	LUAD	0.22799	1.08353e-06	KIRP	0.267275	2.55615e-05	BLCA	0.262088	3.89631e-07	KIRC	0.316951	3.94768e-13	KIRP	0.239621	0.000238423
BRCA	0.0076	2.28	ESCA	0.00260185	HNSC	0.0337849	BLCA	0.219303	3.89905e-05	PRAD	0.183521	0.000189275	PRAD	0.194367	4.64797e-05	PRAD	0.317545	2.62861e-12	LIHC	0.211432	0.000200299
LUSC	0.68	0.92	BLCA	0.230155	ACC	0.037847	PRAD	0.159603	0.00126784	OV	0.193416	0.00279169	KIRP	0.24741	6.51718e-05	BLCA	0.328836	4.0064e-11	KIRC	0.106492	0.0431648
ESCA	0.63	1.18	CESC	0.36534	LUAD	0.119347	KIRC	0.110936	0.0321978	BLCA	0.157691	0.0049861	KIRC	0.174813	0.000135431	LIHC	0.288615	5.7148e-08	BRCA	0.0732069	0.0421604
LUAD	0.97	0.99	CHOL	0.865355	CHOL	0.214202	HNSC	-0.169115	0.00043067	KIRC	0.119432	0.0178803	UCEC	0.123399	0.0440344	THCA	0.202131	1.40638e-05	OV	0.134204	0.046768
STAD	0.76	0.92	OV	0.80069	READ	0.26741	CESC	-0.133596	0.0540342	STAD	0.113509	0.0577079	TGCT	-0.587735	0	LUSC	0.125756	0.013453	THCA	-0.131042	0.0128215
COAD	0.85	1.08	PAAD	0.839033	LUSC	0.356253	LAML	-0.140376	0.163758	LUSC	0.094236	0.0875037	CESC	-0.258275	2.11737e-05	OV	0.138913	0.0338998	PRAD	-0.127402	0.0158213
CESC	0.25	1.46	STAD	0.910475	PAAD	0.605424	COAD	-0.0941162	0.253581	COAD	-0.120987	0.0922492	STAD	0.108919	0.0603321	CESC	-0.142876	0.0310222	ESCA	-0.151956	0.0886936
PRAD	0.37	2.71			KICH	0.581548	LUSC	0.0694759	0.250792	READ	-0.194009	0.124366	ESCA	-0.151245	0.083246	LAML	-0.134723	0.160854	STAD	0.0915804	0.129898
SKCM	0.47	1.19			SKCM	0.762771	READ	-0.151834	0.27249	LAML	-0.123742	0.201468	OV	0.0954434	0.182783	STAD	0.0857942	0.155509	CHOL	-0.302703	0.140551
ACC	0.28	1.75			COAD	0.740619	ESCA	-0.0993272	0.318588	HNSC	0.0653185	0.243085	COAD	-0.0980336	0.173919	READ	-0.17577	0.157903	COAD	-0.103569	0.142582
TGCT	0.13	0			THCA	0.903578	UCEC	0.0631444	0.376041	ESCA	-0.106129	0.250624	READ	-0.166951	0.176344	UCEC	0.0769302	0.232723	PAAD	-0.120497	0.180128
GBM	0.61	0.88			ESCA	0.902881	STAD	-0.0548861	0.41325	ACC	0.126461	0.415876	THCA	-0.0664945	0.209467	ESCA	-0.0831034	0.407015	SKCM	0.0699375	0.201825
HNSC	0.26	0.79			BLCA	0.924232	THCA	-0.041123	0.52133	SKCM	-0.0334407	0.68888	SKCM	-0.0598364	0.285762	GBM	0.0846548	0.408638	TGCT	-0.113139	0.234548
OV	0.62	1.11			STAD	1.0123	ACC	0.0939143	0.56887	GBM	0.0553167	0.664776	ACC	0.12629	0.370569	TGCT	-0.0728359	0.508069	UCEC	0.065669	0.288158
READ	0.28	2.43			BRCA	0.989608	TGCT	-0.0591266	0.609242	TGCT	-0.0470611	0.735839	GBM	0.0856517	0.358209	KICH	-0.0840205	0.659838	KICH	0.113412	0.47854
LAML	0.59	1.14					GBM	0.0404234	0.755925	CESC	0.0258662	0.815039	HNSC	-0.0460182	0.367477	SKCM	-0.0252887	0.729417	LAML	0.0449194	0.696196
LIHC	0.38	1.28					SKCM	-0.0163708	0.860338	KICH	0.0443169	0.861011	LAML	-0.0781761	0.36463	ACC	0.0567429	0.73657	LUSC	-0.0233188	0.7172
CHOL	0.59	1.45					PAAD	-0.0220534	0.874197	UCEC	0.0184495	0.822081	CHOL	-0.172201	0.356778	HNSC	-0.0216882	0.705719	HNSC	0.0201808	0.733526
BLCA	0.091	1.46					OV	-0.0118411	0.908918	THCA	0.00793535	0.932836	PAAD	0.0691064	0.388747	PAAD	0.0288138	0.762546	READ	-0.0371641	0.782854
KICH	0.016	>1					CHOL	0.0198198	0.946627	PAAD	0.0113092	0.917143	LUSC	0.0387602	0.402615	CHOL	0.0473616	0.815968	GBM	0.024444	0.785771
PAAD	0.36	0.73					KICH	-0.0012316	0.99228	CHOL	-0.0236808	0.890972	KICH	-0.0460703	0.712763	COAD	-0.00779048	0.895393	ACC	0.0122687	0.914426
Immune signatures
B cells			CD8+ T cells			HLA			IFN			TILs			CD8+/CD4+ regulatory T cells			PD-L1 Expression
Cancer type	ρ	FDR	Cancer type	ρ	FDR	Cancer type	ρ	FDR	Cancer type	ρ	FDR	Cancer type	ρ	FDR	Cancer type	ρ	FDR	Cancer type	ρ	FDR
LUAD	-0.402465	0	TGCT	-0.475934	1.27044e-08	LUAD	-0.484481	0	LUAD	-0.426909	0	LUAD	-0.410302	0	PRAD	-0.284287	1.56646e-09	CESC	-0.437282	0
BRCA	-0.242362	5.62349e-15	BRCA	-0.178793	3.13781e-08	KIRC	-0.283638	2.03676e-10	CESC	-0.462623	0	CESC	-0.363026	6.56815e-10	SKCM	-0.287578	1.9556e-09	TGCT	-0.5391	0
CESC	-0.334455	2.06458e-08	LUAD	-0.249487	8.34838e-08	THCA	-0.291933	2.88569e-10	HNSC	-0.320052	5.61895e-13	OV	-0.364923	7.19125e-10	BRCA	-0.19401	2.3655e-09	THCA	-0.354555	1.33151e-15
TGCT	-0.428948	2.00703e-07	SKCM	-0.242855	6.30209e-07	OV	-0.357148	9.63175e-10	KIRC	-0.295913	1.85848e-11	TGCT	-0.472226	3.6675e-09	TGCT	-0.389736	3.83347e-06	LUAD	-0.340154	1.12892e-14
SKCM	-0.249467	2.20236e-07	CESC	-0.265926	1.2986e-05	SKCM	-0.242426	5.31581e-07	LIHC	-0.347527	3.39312e-11	BRCA	-0.185374	3.92899e-09	KIRC	-0.183552	9.86289e-05	SKCM	-0.263188	3.21066e-08
KIRC	-0.226573	5.02818e-07	STAD	-0.206576	9.63986e-05	STAD	-0.236866	4.74912e-06	THCA	-0.275268	1.31669e-09	THCA	-0.249262	5.59727e-08	STAD	-0.173027	0.00169243	HNSC	-0.225045	8.47704e-07
STAD	-0.240594	2.73077e-06	PRAD	-0.184177	0.000110834	UCEC	-0.22168	6.30875e-05	BRCA	-0.187204	1.39995e-09	SKCM	-0.24086	4.60246e-07	LUAD	-0.121107	0.0209174	OV	-0.278717	2.76773e-06
LUSC	-0.213324	4.79031e-06	OV	-0.235989	0.00011101	TGCT	-0.3232	0.000132868	OV	-0.332693	8.92074e-09	KIRC	-0.223052	5.96366e-07	COAD	0.152664	0.0301532	BRCA	-0.130641	4.32071e-05
OV	-0.199597	0.00123569	KIRC	-0.158042	0.000682713	BRCA	-0.105798	0.00123074	KIRP	-0.296825	7.89274e-07	STAD	-0.239	2.26906e-06	OV	-0.125973	0.0760299	LUSC	-0.161566	0.000705319
THCA	-0.15144	0.00153986	UCEC	-0.18717	0.000736091	KIRP	-0.201515	0.00126505	PAAD	-0.370274	1.03001e-06	UCEC	-0.253156	2.44396e-06	BLCA	0.106742	0.0777802	STAD	-0.1734	0.000896532
LIHC	-0.16679	0.0028211	THCA	-0.108129	0.0333987	PAAD	-0.257441	0.00130928	TGCT	-0.357601	1.10839e-05	LIHC	-0.173392	0.00178106	UCEC	-0.108955	0.082318	ESCA	-0.258491	0.000829059
BLCA	-0.125125	0.02379	LIHC	-0.102713	0.0988426	CESC	-0.186713	0.00218853	STAD	-0.222162	1.17582e-05	LUSC	-0.147911	0.0018922	CESC	-0.102783	0.151272	PRAD	-0.112868	0.0209276
UCEC	-0.127223	0.0276518	PAAD	-0.139506	0.120346	LAML	-0.196481	0.0185949	SKCM	-0.153542	0.00159205	LAML	-0.231499	0.00429003	READ	0.147942	0.253801	KIRC	-0.10538	0.0247346
COAD	-0.134412	0.0407507	ESCA	-0.125861	0.15679	PRAD	-0.112524	0.0214538	ESCA	-0.23143	0.00279564	PAAD	-0.212232	0.00787784	GBM	0.117068	0.25573	BLCA	0.211954	4.38801e-05
PAAD	-0.163919	0.0473974	GBM	0.111718	0.252874	LIHC	-0.109826	0.0566949	LUSC	-0.132124	0.00511264	KIRP	-0.140298	0.027816	LAML	0.109847	0.268055	KIRP	0.204211	0.000898593
KICH	-0.237115	0.0815413	BLCA	0.0665863	0.280446	LUSC	-0.0930217	0.0584786	LAML	-0.171837	0.0373291	ESCA	-0.16184	0.0435046	KICH	0.163094	0.297299	PAAD	-0.132486	0.120427
KIRP	0.113797	0.0820603	KICH	0.144515	0.362264	HNSC	-0.0842093	0.0801618	GBM	0.0990024	0.283621	PRAD	-0.0799486	0.109817	THCA	0.0492854	0.392581	LAML	-0.126442	0.143207
LAML	-0.111458	0.189731	ACC	0.105769	0.490019	ESCA	-0.135147	0.0925958	UCEC	-0.0670464	0.291302	COAD	-0.0885639	0.186661	ESCA	-0.0728953	0.42603	ACC	0.157428	0.23037
HNSC	0.0648332	0.19315	HNSC	-0.0364611	0.533939	ACC	0.142648	0.275466	BLCA	-0.0402035	0.549991	BLCA	-0.0442943	0.489712	LUSC	0.0449857	0.437258	GBM	-0.0890963	0.333379
ESCA	-0.101672	0.210425	LUSC	-0.032394	0.586586	CHOL	0.155212	0.455794	COAD	-0.0455195	0.552688	READ	-0.0746221	0.589573	ACC	0.0833009	0.580854	READ	-0.0641937	0.669882
PRAD	-0.0430481	0.401899	KIRP	-0.0386503	0.608489	READ	-0.0870661	0.477174	CHOL	-0.0566281	0.843368	HNSC	-0.0247332	0.681997	PAAD	-0.0458519	0.645066	LIHC	0.0249342	0.751447
READ	-0.0663074	0.593797	CHOL	-0.0406692	0.88417	COAD	-0.0447068	0.511759	PRAD	-0.0167393	0.844431	GBM	-0.0321674	0.739632	CHOL	-0.0934363	0.666507	CHOL	0.0736165	0.759759
GBM	0.0355989	0.704938	COAD	0.0149769	0.909586	GBM	-0.0552879	0.520509	READ	-0.0174832	0.94158	ACC	0.0513145	0.741719	HNSC	0.0135831	0.822673	KICH	-0.0336291	0.856751
ACC	0.0115385	0.919507	LAML	0.000991976	0.989667	KICH	-0.0437324	0.757038	KICH	-0.00695126	0.955832	CHOL	-0.00694981	0.968336	KIRP	0.00447823	0.978472	COAD	-0.00438941	0.980188
CHOL	-0.0203346	0.944154	READ	0.00197368	1.02592	BLCA	0.00911172	0.854416	ACC	0.00993184	0.969475	KICH	0.00928922	0.980162	LIHC	3.09858e-05	0.999526	UCEC	-0.000744843	0.988607
Tumor purity
Cancer type	ρ	FDR
PRAD	0.420343	3.79569e-15
LUAD	0.36675	7.0164e-14
BRCA	0.245354	2.6965e-13
HNSC	0.2712	6.26851e-09
OV	0.351392	5.61079e-09
LUSC	0.221174	1.44254e-05
UCEC	0.20721	0.00115845
TGCT	0.279832	0.0027725
CESC	0.444938	0.0209306
SKCM	0.128576	0.0255551
KIRP	-0.186517	0.0074528
STAD	0.127315	0.0510713
CHOL	0.332915	0.112197
READ	0.191087	0.139284
KICH	-0.214473	0.156905
THCA	0.116549	0.186269
LIHC	0.0883736	0.178077
KIRC	0.0670785	0.241897
COAD	0.0661196	0.414373
PAAD	0.0814233	0.425813
ESCA	0.0751788	0.425359
GBM	-0.0625243	0.518847
LAML	0.0276802	0.889956
ACC	0.02304	0.881856
BLCA	-0.002467	0.976671

## Sheet: Data 8
Supplementary Data 8. A summary of the gene expression profiling datasets used in this study
Discovery datasets
Cancer type	Dataset ID	Platform	Number of genes	Number of all samples	Number of tumor samples	Number of normal samples	Sources
Adrenocortical Carcinoma	TCGA-ACC	RNA-Seq	20531	208	79	129	TCGA, GTEx
Bladder Urothelial Carcinoma	TCGA-BLCA	RNA-Seq	20531	427	408	19	TCGA
Breast Invasive Carcinoma	TCGA-BRCA	RNA-Seq	20531	1212	1100	112	TCGA
Cervical Squamous-Cell Carcinoma And Endocervical Adeno-Carcinoma	TCGA-CESC	RNA-Seq	20531	316	306	10	TCGA, GTEx
Cholangiocarcinoma	TCGA-CHOL	RNA-Seq	20531	45	36	9	TCGA
Colon Adenocarcinoma	TCGA-COAD	RNA-Seq	20531	328	287	41	TCGA
Esophageal Carcinoma	TCGA-ESCA	RNA-Seq	20531	196	185	11	TCGA
Glioblastoma Multiforme	TCGA-GBM	RNA-Seq	20531	171	166	5	TCGA
Head And Neck Squamous Cell Carcinoma	TCGA-HNSC	RNA-Seq	20531	566	522	44	TCGA
Kidney Chromophobe	TCGA-KICH	RNA-Seq	20531	91	66	25	TCGA
Kidney Renal Clear Cell Carcinoma	TCGA-KIRC	RNA-Seq	20531	606	534	72	TCGA
Kidney Renal Papillary Cell Carcinoma	TCGA-KIRP	RNA-Seq	20531	323	291	32	TCGA
Acute Myeloid Leukemia	TCGA-LAML	RNA-Seq	20531	511	173	338	TCGA, GTEx
Liver Hepatocellular Carcinoma	TCGA-LIHC	RNA-Seq	20531	423	373	50	TCGA
Lung Adenocarcinoma	TCGA-LUAD	RNA-Seq	20531	576	517	59	TCGA
Lung Squamous Cell Carcinoma	TCGA-LUSC	RNA-Seq	20531	552	501	51	TCGA
Ovarian Serous Cystadeno Carcinoma	TCGA-OV	RNA-Seq	20531	396	307	89	TCGA, GTEx
Pancreatic Adeno-Carcinoma	TCGA-PAAD	RNA-Seq	20531	347	179	168	TCGA, GTEx
Prostate Adenocarcinoma	TCGA-PRAD	RNA-Seq	20531	550	498	52	TCGA
Rectum Adenocarcinoma	TCGA-READ	RNA-Seq	20531	105	95	10	TCGA
Skincutaneous Melanoma	TCGA-SKCM	RNA-Seq	20531	1029	472	557	TCGA, GTEx
Stomach Adenocarcinoma	TCGA-STAD	RNA-Seq	20531	450	415	35	TCGA
Testicular Germ-Cell Tumors	TCGA-TGCT	RNA-Seq	20531	322	156	166	TCGA, GTEx
Thyroid Carcinoma	TCGA-THCA	RNA-Seq	20531	568	509	59	TCGA
Uterine Corpus Endometrial Carcinoma	TCGA-UCEC	RNA-Seq	20531	381	370	11	TCGA
Pan-cancer	TCGA-Pan-cancer	RNA-Seq	20531	9685	8954	730	TCGA
Total				20384	17499	2884
Validation datasets
Cancer type	Dataset ID	Platform	Number of genes	Number of all samples	Number of tumor samples	Number of normal samples	Datasets	Sources
Bladder Urothelial Carcinoma	BLCA-GSE3167	GPL96	14060	60	14	46	GSE3167	[1]
Breast Invasive Carcinoma	BRCA-metabric	GPL6947	24368	1980	0	1980	Metabric	[2]
Cervical Squamous-Cell Carcinoma And Endocervical Adeno-Carcinoma	CESC-GSE26511	GPL570	30803	39	0	39	GSE26511	[3]
Cervical Squamous-Cell Carcinoma And Endocervical Adeno-Carcinoma	CESC-GSE9750	GPL96	14060	66	24	42	GSE9750	[4]
Cholangiocarcinoma	CHOL-GSE32225	GPL8432	18402	155	6	149	GSE32225	[5]
Colon Adenocarcinoma	COAD-GPL570	GPL570	22852	1485	25	1460	GSE40967,GSE13067,GSE13294,GSE14333,GSE17536/17537,GSE18088,GSE33113	[6-14]
Colon Adenocarcinoma	COAD-GSE25071	GPL2986	15459	50	4	46	GSE25071	[15]
Colon Adenocarcinoma	COAD-GSE8671	GPL570	30801	64	32	32	GSE8671	[16]
Esophageal Carcinoma	ESCA-GPL570	GPL570	22852	155	29	126	GSE26886,GSE32701,GSE45670,GSE51021	[17-20]
Esophageal Carcinoma	ESCA-GPL96	GPL96	13218	168	92	76	GSE1420,GSE23400,GSE37200	[21-27]
Esophageal Carcinoma	ESCA-GSE20347	GPL571	14051	34	17	17	GSE20347	[28]
Esophageal Carcinoma	ESCA-GSE23400	GPL97	11222	102	51	51	GSE23400	[29-31]
Glioblastoma Multiforme	GBM-GPL570	GPL570	11582	727	66	661	GSE4290,GSE7696,GSE26576,GSE29796,GSE36245,GSE43378,GSE50161,GSE51062,GSE51413,E-TABM-898	[32-43]
Glioblastoma Multiforme	GBM-GSE16011	GPL8542	17527	284	8	276	GSE16011	[44]
Glioblastoma Multiforme	GBM-GSE4290	GPL570	22854	180	27	153	GSE4290	[43]
Glioblastoma Multiforme	GBM-GSE50161	GPL570	11582	130	13	117	GSE50161	[40]
Glioblastoma Multiforme	GBM-GSE7696	GPL570	22854	84	4	80	GSE7696	[41-42]
Kidney Renal Clear Cell Carcinoma	KIRC-E-GEOD-40435	GPL10558	31312	202	101	101	E-GEOD-40435	[45]
Kidney Renal Clear Cell Carcinoma	KIRC-E-MTAB-6692	GPL570	22852	347	104	243	GSE36895, GSE23629, GSE11151, GSE53757, GSE12606, GSE12090	[46-54]
Kidney Renal Clear Cell Carcinoma	KIRC-GPL3921	GPL3921	13329	217	11	206	GSE14994,GSE19949	[55-56]
Acute Myeloid Leukemia	LAML-GSE13164	GPL7473	1187	315	58	257	GSE13164	[57-58]
Acute Myeloid Leukemia	LAML-GSE15061	GPL570	22854	542	138	404	GSE15061	[59]
Liver Hepatocellular Carcinoma	LIHC-GSE14520	GPL3921	13329	445	220	225	GSE14520	[60-63]
Liver Hepatocellular Carcinoma	LIHC-GSE25097	GPL10687	18076	517	249	268	GSE25097	[64-67]
Liver Hepatocellular Carcinoma	LIHC-GSE41804	GPL570	22852	40	20	20	GSE41804	[68]
Lung Cancer	LUNG-E-MTAB-6699	GPL570	20543	1621	207	1414	GSE10245, GSE10445, GSE10799, GSE12667, GSE18842, GSE19188, GSE28571, GSE30219, GSE31210, GSE33356, GSE37745, GSE50081	[69-84]
Lung Cancer	LUNG-GSE10072	GPL96	14060	107	49	58	GSE10072	[85]
Ovarian Serous Cystadeno Carcinoma	OV-E-MTAB-6691	GPL570	43657	641	54	587	GSE9899, GSE10971, GSE14001, GSE14407, GSE18520, GSE19352, GSE15578, GSE12172, GSE19829, GSE30161	[86-96]
Pancreatic Adeno-Carcinoma	PAAD-E-MTAB-6690	GPL570	22852	178	70	108	GSE15471,GSE16515, GSE22780,GSE32676	[97-101]
Pancreatic Adeno-Carcinoma	PAAD-GSE62452	GPL6244	23304	130	61	69	GSE62452	[102]
Pancreatic Adeno-Carcinoma	PAAD-GSE71729	GPL20769	19749	357	134	223	GSE71729	[103]
Prostate Adenocarcinoma	PRAD-CA	RNA-Seq	46487	144	0	144	PRAD-CA	ICGC (https://icgc.org/)
Prostate Adenocarcinoma	PRAD-E-MTAB-6694	GPL570	22852	237	116	121	GSE17951, GSE55945, GSE3325, GSE26910, GSE45016, GSE17906	[104-111]
Prostate Adenocarcinoma	PRAD-GPL10558	GPL10558	31424	293	74	219	GSE70768,GSE70769	[112-113]
Prostate Adenocarcinoma	PRAD-GPL8300	GPL8300	9069	392	86	306	GSE1431,GSE6605,GSE6606,GSE6608,GSE68555	[114-124]
Prostate Adenocarcinoma	PRAD-GPL96	GPL96	13218	227	4	223	GSE8218,GSE25136	[125-127]
Skincutaneous Melanoma	SKCM-GSE3189	GPL96	14060	70	25	45	GSE3189	[128]
Stomach Adenocarcinoma	STAD-ACRG	GPL570	22600	300	0	300	ACRG	[129]
Stomach Adenocarcinoma	STAD-E-MTAB-6693	GPL570	22852	737	46	691	GSE15459, GSE34942, GSE62254, GSE13911, GSE35809, GSE19826, GSE38749	[130-145]
Stomach Adenocarcinoma	STAD-GSE35809	GPL570	30803	70	0	70	GSE35809	[146-148]
Uterine Corpus Endometrial Carcinoma	UCEC-GSE17025	GPL570	30803	103	12	91	GSE17025	[149]
Breast Invasive Carcinoma	BRCA-E-MTAB-6703	GPL570	20545	2302	214	2088	GSE3744, GSE19615, GSE21653, GSE12276, GSE26639, GSE9195, GSE23177, GSE23593, GSE16446, GSE20685, GSE20711, GSE7904, GSE18864, GSE42568, GSE50567, GSE28821, GSE5764, GSE10780, GSE22513, GSE28796	[150-179]
Total				16297	2465	13832
Datasets with cancer immunotherapy
Cancer type	Dataset ID	Number of samples	Sources
Melanoma	Hugo cohort	28	[180]
Kidney Renal Clear Cell Carcinoma	Miao cohort	33	[181]
Datasets for cancer cell lines
Cancer type	Dataset ID	Number of samples	Number of genes	Sources
Pan-cancer	Cancer Cell Line Encyclopedia (CCLE)	1018	17420	GDSC (https://www.cancerrxgene.org)
Datasets with drug response
Cancer type	Dataset ID	Number of samples	Number of genes	Sources
Breast Cancer	GSE1379	60	22575	[182]
Melanoma	GSE123728	11	814	[183]
Lower Grade Glioma	GSE107850	195	29285	[184]
Acute Myeloid Leukemia	TARGET-AML	187	56002	TARGET
Acute Lymphoblastic Leukemia	TARGET-ALL	203	23968	TARGET
Neuroblastoma	TARGET-NBL	151	55290	TARGET
Pan-cancer	TARGET-pan-cancer	734	59388	TARGET
Datasets for in silico simulation
Cancer type	Dataset ID	Number of samples	Number of genes	Sources
Pan-cancer	Cancer Cell Line Encyclopedia (CCLE)	1018	17420	GDSC (https://www.cancerrxgene.org)
Lung Cancer	GSE69405	201	16824	[185]
Lung Cancer	GSE113660	6875	8603	[186-187]
Glioblastoma	GSE578721	532	5948	[188]
Sources
[1] Dyrskjøt L, Kruhøffer M, Thykjaer T, Marcussen N et al. Gene expression in the urinary bladder: a common carcinoma in situ gene expression signature exists disregarding histopathological classification. Cancer Res 2004 Jun 1;64(11):4040-8.
[2] Curtis C, et al. The genomic and transcriptomic architecture of 2,000 breast tumours reveals novel subgroups. Nature. 2012;486(7403):346–52.
[3] Noordhuis MG, Fehrmann RS, Wisman GB, Nijhuis ER et al. Involvement of the TGF-beta and beta-catenin pathways in pelvic lymph node metastasis in early-stage cervical cancer. Clin Cancer Res 2011 Mar 15;17(6):1317-30.
[4] Scotto L, Narayan G, Nandula SV, Arias-Pulido H et al. Identification of copy number gain and overexpressed genes on chromosome arm 20q by an integrative genomic approach in cervical cancer: potential in progression. Genes Chromosomes Cancer 2008 Sep;47(9):755-65.
[5] Sia D, Hoshida Y, Villanueva A, Roayaie S et al. Integrative molecular analysis of intrahepatic cholangiocarcinoma reveals 2 classes that have different outcomes. Gastroenterology 2013 Apr;144(4):829-40.
[6] Marisa L, de Reyniès A, Duval A, Selves J et al. Gene expression classification of colon cancer into molecular subtypes: characterization, validation, and prognostic value. PLoS Med 2013;10(5):e1001453.
[7] Jorissen RN, Lipton L, Gibbs P, Chapman M et al. DNA copy-number alterations underlie gene expression differences between microsatellite stable and unstable colorectal cancers. Clin Cancer Res 2008 Dec 15;14(24):8061-9.
[8] Jorissen RN, Lipton L, Gibbs P, Chapman M et al. DNA copy-number alterations underlie gene expression differences between microsatellite stable and unstable colorectal cancers. Clin Cancer Res 2008 Dec 15;14(24):8061-9.
[9] Jorissen RN, Gibbs P, Christie M, Prakash S et al. Metastasis-Associated Gene Expression Changes Predict Poor Outcomes in Patients with Dukes Stage B and C Colorectal Cancer. Clin Cancer Res 2009 Dec 15;15(24):7642-7651.
[10] Smith JJ, Deane NG, Wu F, Merchant NB et al. Experimentally derived metastasis gene expression profile predicts recurrence and death in patients with colon cancer. Gastroenterology 2010 Mar;138(3):958-68.
[11] Freeman TJ, Smith JJ, Chen X, Washington MK et al. Smad4-mediated signaling inhibits intestinal neoplasia by inhibiting expression of β-catenin. Gastroenterology 2012 Mar;142(3):562-571.e2.
[12] Gröne J, Lenze D, Jurinovic V, Hummel M et al. Molecular profiles and clinical outcome of stage UICC II colon cancer patients. Int J Colorectal Dis 2011 Jul;26(7):847-58.
[13] de Sousa E Melo F, Colak S, Buikhuisen J, Koster J et al. Methylation of cancer-stem-cell-associated Wnt target genes predicts poor prognosis in colorectal cancer patients. Cell Stem Cell 2011 Nov 4;9(5):476-85.
[14] Kemper K, Versloot M, Cameron K, Colak S et al. Mutations in the Ras-Raf Axis underlie the prognostic value of CD133 in colorectal cancer. Clin Cancer Res2012 Jun 1;18(11):3132-41.
[15] Agesen TH, Berg M, Clancy T, Thiis-Evensen E et al. CLC and IFNAR1 are differentially expressed and a global immunity score is distinct between early- and late-onset colorectal cancer. Genes Immun 2011 Dec;12(8):653-62.
[16] Sabates-Bellver J, Van der Flier LG, de Palo M, Cattaneo E et al. Transcriptome profile of human colorectal adenomas. Mol Cancer Res 2007 Dec;5(12):1263-75.
[17] Wang Q, Ma C, Kemmner W. Wdr66 is a novel marker for risk stratification and involved in epithelial-mesenchymal transition of esophageal squamous cell carcinoma. BMC Cancer 2013 Mar 21;13:137.
[18] Aoyagi K, Minashi K, Igaki H, Tachimori Y et al. Artificially induced epithelial-mesenchymal transition in surgical subjects: its implications in clinical and basic cancer research. PLoS One 2011 Apr 21;6(4):e18196.
[19] Wen J, Yang H, Liu MZ, Luo KJ et al. Gene expression analysis of pretreatment biopsies predicts the pathological response of esophageal squamous cell carcinomas to neo-chemoradiotherapy. Ann Oncol 2014 Sep;25(9):1769-74.
[20] Otto B, Koenig AM, Tolstonog GV, Jeschke A et al. Molecular changes in pre-metastatic lymph nodes of esophageal cancer patients. PLoS One2014;9(7):e102552.
[21] Kimchi ET, Posner MC, Park JO, Darga TE et al. Progression of Barrett's metaplasia to adenocarcinoma is associated with the suppression of the transcriptional programs of epidermal differentiation. Cancer Res 2005 Apr 15;65(8):3146-54.
[22] Su H, Hu N, Yang HH, Wang C et al. Global gene expression profiling and validation in esophageal squamous cell carcinoma and its association with clinical phenotypes. Clin Cancer Res 2011 May 1;17(9):2955-66.
[23] Li WQ, Hu N, Burton VH, Yang HH et al. PLCE1 mRNA and protein expression and survival of patients with esophageal squamous cell carcinoma and gastric adenocarcinoma. Cancer Epidemiol Biomarkers Prev 2014 Aug;23(8):1579-1588.
[24] Hyland PL, Zhang H, Yang Q, Yang HH et al. Pathway, in silico and tissue-specific expression quantitative analyses of oesophageal squamous cell carcinoma genome-wide association studies data. Int J Epidemiol 2016 Feb;45(1):206-20.
[25] Silvers AL, Lin L, Bass AJ, Chen G et al. Decreased selenium-binding protein 1 in esophageal adenocarcinoma results from posttranscriptional and epigenetic regulation and affects chemosensitivity. Clin Cancer Res 2010 Apr 1;16(7):2009-21.
[26] Leicht DT, Kausar T, Wang Z, Ferrer-Torres D et al. TGM2: a cell surface marker in esophageal adenocarcinomas. J Thorac Oncol 2014 Jun;9(6):872-81.
[27] Lin J, Myers AL, Wang Z, Nancarrow DJ et al. Osteopontin (OPN/SPP1) isoforms collectively enhance tumor cell invasion and dissemination in esophageal adenocarcinoma. Oncotarget 2015 Sep 8;6(26):22239-57.
[28] Hu N, Clifford RJ, Yang HH, Wang C et al. Genome wide analysis of DNA copy number neutral loss of heterozygosity (CNNLOH) and its relation to gene expression in esophageal squamous cell carcinoma. BMC Genomics 2010 Oct 18;11:576.
[29] Su H, Hu N, Yang HH, Wang C et al. Global gene expression profiling and validation in esophageal squamous cell carcinoma and its association with clinical phenotypes. Clin Cancer Res 2011 May 1;17(9):2955-66.
[30] Li WQ, Hu N, Burton VH, Yang HH et al. PLCE1 mRNA and protein expression and survival of patients with esophageal squamous cell carcinoma and gastric adenocarcinoma. Cancer Epidemiol Biomarkers Prev 2014 Aug;23(8):1579-1588.
[31] Hyland PL, Zhang H, Yang Q, Yang HH et al. Pathway, in silico and tissue-specific expression quantitative analyses of oesophageal squamous cell carcinoma genome-wide association studies data. Int J Epidemiol 2016 Feb;45(1):206-20.
[32] Paugh BS, Broniscer A, Qu C, Miller CP et al. Genome-wide analyses identify recurrent amplifications of receptor tyrosine kinases and cell-cycle regulatory genes in diffuse intrinsic pontine glioma. J Clin Oncol 2011 Oct 20;29(30):3999-4006.
[33] Auvergne RM, Sim FJ, Wang S, Chandler-Militello D et al. Transcriptional differences between normal and glioma-derived glial progenitor cells identify a core set of dysregulated genes. Cell Rep 2013 Jun 27;3(6):2127-41.
[34] Sturm D, Witt H, Hovestadt V, Khuong-Quang DA et al. Hotspot mutations in H3F3A and IDH1 define distinct epigenetic and biological subgroups of glioblastoma. Cancer Cell 2012 Oct 16;22(4):425-37.
[35] Kawaguchi A, Yajima N, Tsuchiya N, Homma J et al. Gene expression signature-based prognostic risk score in patients with glioblastoma. Cancer Sci2013 Sep;104(9):1205-10.
[36] Wybouw N, Dermauw W, Tirry L, Stevens C et al. A gene horizontally transferred from bacteria protects arthropods from host plant cyanide poisoning. Elife 2014 Apr 24;3:e02365.
[37] Snoeck S, Wybouw N, Van Leeuwen T, Dermauw W. Transcriptomic Plasticity in the Arthropod Generalist <i>Tetranychus urticae</i> Upon Long-Term Acclimation to Different Host Plants. G3 (Bethesda) 2018 Dec 10;8(12):3865-3879.
[38] Chong YK, Sandanaraj E, Koh LW, Thangaveloo M et al. ST3GAL1-Associated Transcriptomic Program in Glioblastoma Tumor Growth, Invasion, and Prognosis. J Natl Cancer Inst 2016 Feb;108(2).
[39] Ducray F, de Reyniès A, Chinot O, Idbaih A, Figarella-Branger D, Colin C, Karayan-Tapon L, Chneiweiss H, Wager M, Vallette F, Marie Y, Rickman D, Thomas E, Delattre JY, Honnorat J, Sanson M, Berger F. An ANOCEF genomic and transcriptomic microarray study of the response to radiotherapy or to alkylating first-line chemotherapy in glioblastoma patients. Mol Cancer. 2010 Sep 7;9:234. doi: 10.11…
[40] Griesinger AM, Birks DK, Donson AM, Amani V et al. Characterization of distinct immunophenotypes across pediatric brain tumor types. J Immunol 2013 Nov 1;191(9):4880-8.
[41] Murat A, Migliavacca E, Gorlia T, Lambiv WL et al. Stem cell-related "self-renewal" signature and high epidermal growth factor receptor expression associated with resistance to concomitant chemoradiotherapy in glioblastoma. J Clin Oncol 2008 Jun 20;26(18):3015-24.
[42] Lambiv WL, Vassallo I, Delorenzi M, Shay T et al. The Wnt inhibitory factor 1 (WIF1) is targeted in glioblastoma and has a tumor suppressing function potentially by induction of senescence. Neuro Oncol 2011 Jul;13(7):736-47.
[43] Sun L, Hui AM, Su Q, Vortmeyer A et al. Neuronal and glioma-derived stem cell factor induces angiogenesis within the brain. Cancer Cell 2006 Apr;9(4):287-300.
[44] Gravendeel LA, Kouwenhoven MC, Gevaert O, de Rooi JJ et al. Intrinsic gene expression profiles of gliomas are a better predictor of survival than histology. Cancer Res 2009 Dec 1;69(23):9065-72.
[45] Wozniak MB, Le Calvez-Kelm F, Abedi-Ardekani B, Byrnes G et al. Integrative genome-wide gene expression profiling of clear cell renal cell carcinoma in Czech Republic and in the United States. PLoS One 2013;8(3):e57886.
[46] Peña-Llopis S, Vega-Rubín-de-Celis S, Liao A, Leng N et al. BAP1 loss defines a new class of renal cell carcinoma. Nat Genet 2012 Jun 10;44(7):751-9.
[47] Peña-Llopis S, Brugarolas J. Simultaneous isolation of high-quality DNA, RNA, miRNA and proteins from tissues for genomic applications. Nat Protoc 2013 Nov;8(11):2240-55.
[48] López-Lago MA, Thodima VJ, Guttapalli A, Chan T et al. Genomic deregulation during metastasis of renal cell carcinoma implements a myofibroblast-like program of gene expression. Cancer Res 2010 Dec 1;70(23):9682-92.
[49] Yusenko MV, Kuiper RP, Boethe T, Ljungberg B et al. High-resolution DNA copy number and gene expression analyses distinguish chromophobe renal cell carcinomas and renal oncocytomas. BMC Cancer 2009 May 18;9:152.
[50] Yusenko MV, Zubakov D, Kovacs G. Gene expression profiling of chromophobe renal cell carcinomas and renal oncocytomas by Affymetrix GeneChip using pooled and individual tumours. Int J Biol Sci 2009 Jul 29;5(6):517-27.
[51] Yusenko MV, Ruppert T, Kovacs G. Analysis of differentially expressed mitochondrial proteins in chromophobe renal cell carcinomas and renal oncocytomas by 2-D gel electrophoresis. Int J Biol Sci 2010 Apr 23;6(3):213-24.
[52] von Roemeling CA, Radisky DC, Marlow LA, Cooper SJ et al. Neuronal pentraxin 2 supports clear cell renal cell carcinoma by activating the AMPA-selective glutamate receptor-4. Cancer Res 2014 Sep 1;74(17):4796-810.
[53] Stickel JS, Weinzierl AO, Hillen N, Drews O et al. HLA ligand profiles of primary renal cell carcinoma maintained in metastases. Cancer Immunol Immunother2009 Sep;58(9):1407-17.
[54] Rohan S, Tu JJ, Kao J, Mukherjee P et al. Gene expression profiling separates chromophobe renal cell carcinoma from oncocytoma and identifies vesicular transport and cell junction proteins as differentially expressed genes. Clin Cancer Res 2006 Dec 1;12(23):6937-45.
[55] Beroukhim R, Brunet JP, Di Napoli A, Mertz KD et al. Patterns of gene expression and copy-number alterations in von-hippel lindau disease-associated and sporadic clear cell carcinoma of the kidney. Cancer Res 2009 Jun 1;69(11):4674-81.
[56] Beleut M, Zimmermann P, Baudis M, Bruni N et al. Integrative genome-wide expression profiling identifies three distinct molecular subgroups of renal cell carcinoma with different patient outcome. BMC Cancer 2012 Jul 23;12:310.
[57] Kohlmann A, Kipps TJ, Rassenti LZ, Downing JR et al. An international standardization programme towards the application of gene expression profiling in routine leukaemia diagnostics: the Microarray Innovations in LEukemia study prephase. Br J Haematol 2008 Sep;142(5):802-7.
[58] Haferlach T, Kohlmann A, Wieczorek L, Basso G et al. Clinical utility of microarray-based gene expression profiling in the diagnosis and subclassification of leukemia: report from the International Microarray Innovations in Leukemia Study Group. J Clin Oncol 2010 May 20;28(15):2529-37.
[59] Mills KI, Kohlmann A, Williams PM, Wieczorek L et al. Microarray-based classifiers and prognosis models identify subgroups with distinct clinical outcomes and high risk of AML transformation of myelodysplastic syndrome. Blood 2009 Jul 30;114(5):1063-72.
[60] Roessler S, Jia HL, Budhu A, Forgues M et al. A unique metastasis gene signature enables prediction of tumor relapse in early-stage hepatocellular carcinoma patients. Cancer Res 2010 Dec 15;70(24):10202-12.
[61] Roessler S, Long EL, Budhu A, Chen Y et al. Integrative genomic identification of genes on 8p associated with hepatocellular carcinoma progression and patient survival. Gastroenterology 2012 Apr;142(4):957-966.e12.
[62] Zhao X, Parpart S, Takai A, Roessler S et al. Integrative genomics identifies YY1AP1 as an oncogenic driver in EpCAM(+) AFP(+) hepatocellular carcinoma. Oncogene 2015 Sep 24;34(39):5095-104.
[63] Wang Y, Gao B, Tan PY, Handoko YA et al. Genome-wide CRISPR knockout screens identify NCAPG as an essential oncogene for hepatocellular carcinoma tumor growth. FASEB J 2019 Aug;33(8):8759-8770.
[64] Tung EK, Mak CK, Fatima S, Lo RC et al. Clinicopathological and prognostic significance of serum and tissue Dickkopf-1 levels in human hepatocellular carcinoma. Liver Int 2011 Nov;31(10):1494-504.
[65] Lamb JR, Zhang C, Xie T, Wang K et al. Predictive genes in adjacent normal tissue are preferentially altered by sCNV during tumorigenesis in liver cancer and may rate limiting. PLoS One 2011;6(7):e20090.
[66] Sung WK, Zheng H, Li S, Chen R et al. Genome-wide survey of recurrent HBV integration in hepatocellular carcinoma. Nat Genet 2012 May 27;44(7):765-9.
[67] Wong KF, Liu AM, Hong W, Xu Z et al. Integrin α2β1 inhibits MST1 kinase phosphorylation and activates Yes-associated protein oncogenic signaling in hepatocellular carcinoma. Oncotarget 2016 Nov 22;7(47):77683-77695.
[68] Hodo Y, Honda M, Tanaka A, Nomura Y et al. Association of interleukin-28B genotype and hepatocellular carcinoma recurrence in patients with chronic hepatitis C. Clin Cancer Res 2013 Apr 1;19(7):1827-37.
[69] Der SD, Sykes J, Pintilie M, Zhu CQ et al. Validation of a histology-independent prognostic gene signature for early-stage, non-small-cell lung cancer including stage IA patients. J Thorac Oncol 2014 Jan;9(1):59-64.
[70] Kuner R, Muley T, Meister M, Ruschhaupt M et al. Global gene expression analysis reveals specific patterns of cell junctions in non-small cell lung cancer subtypes. Lung Cancer 2009 Jan;63(1):32-8.
[71] Broët P, Camilleri-Broët S, Zhang S, Alifano M et al. Prediction of clinical outcome in multiple lung cancer cohorts by integrative genomics: implications for chemotherapy selection. Cancer Res 2009 Feb 1;69(3):1055-62.
[72] Alifano M, Souazé F, Dupouy S, Camilleri-Broët S et al. Neurotensin receptor 1 determines the outcome of non-small cell lung cancer. Clin Cancer Res 2010 Sep 1;16(17):4401-10.
[73] Wrage M, Ruosaari S, Eijk PP, Kaifi JT et al. Genomic profiles associated with early micrometastasis in lung cancer: relevance of 4q deletion. Clin Cancer Res2009 Mar 1;15(5):1566-74.
[74] Ding L, Getz G, Wheeler DA, Mardis ER et al. Somatic mutations affect key pathways in lung adenocarcinoma. Nature 2008 Oct 23;455(7216):1069-75.
[75] Sanchez-Palencia A, Gomez-Morales M, Gomez-Capilla JA, Pedraza V et al. Gene expression profiling reveals novel biomarkers in nonsmall cell lung cancer. Int J Cancer 2011 Jul 15;129(2):355-64.
[76] Hou J, Aerts J, den Hamer B, van Ijcken W et al. Gene expression-based classification of non-small cell lung carcinomas and survival prediction. PLoS One 2010 Apr 22;5(4):e10312.
[77] Micke P, Edlund K, Holmberg L, Kultima HG et al. Gene copy number aberrations are associated with survival in histologic subgroups of non-small cell lung cancer. J Thorac Oncol 2011 Nov;6(11):1833-40.
[78] Jabs V, Edlund K, König H, Grinberg M et al. Integrative analysis of genome-wide gene copy number changes and gene expression in non-small cell lung cancer. PLoS One 2017;12(11):e0187246.
[79] Rousseaux S, Debernardi A, Jacquiau B, Vitte AL et al. Ectopic activation of germline and placental genes identifies aggressive metastasis-prone lung cancers. Sci Transl Med 2013 May 22;5(186):186ra66.
[80] Okayama H, Kohno T, Ishii Y, Shimada Y et al. Identification of genes upregulated in ALK-positive and EGFR/KRAS/ALK-negative lung adenocarcinomas. Cancer Res 2012 Jan 1;72(1):100-11.
[81] Yamauchi M, Yamaguchi R, Nakata A, Kohno T et al. Epidermal growth factor receptor tyrosine kinase defines critical prognostic genes of stage I lung adenocarcinoma. PLoS One 2012;7(9):e43923.
[82] Lu TP, Lai LC, Tsai MH, Chen PC et al. Integrated analyses of copy number variations and gene expression in lung adenocarcinoma. PLoS One2011;6(9):e24829.
[83] Botling J, Edlund K, Lohr M, Hellwig B et al. Biomarker discovery in non-small cell lung cancer: integrating gene expression profiling, meta-analysis, and tissue microarray validation. Clin Cancer Res 2013 Jan 1;19(1):194-204.
[84] Jabs V, Edlund K, König H, Grinberg M et al. Integrative analysis of genome-wide gene copy number changes and gene expression in non-small cell lung cancer. PLoS One 2017;12(11):e0187246.
[85] Landi MT, Dracheva T, Rotunno M, Figueroa JD et al. Gene expression signature of cigarette smoking and its role in lung adenocarcinoma development and survival. PLoS One 2008 Feb 20;3(2):e1651.
[86] Tothill RW, Tinker AV, George J, Brown R et al. Novel molecular subtypes of serous and endometrioid ovarian cancer linked to clinical outcome. Clin Cancer Res 2008 Aug 15;14(16):5198-208.
[87] Tone AA, Begley H, Sharma M, Murphy J et al. Gene expression profiles of luteal phase fallopian tube epithelium from BRCA mutation carriers resemble high-grade serous carcinoma. Clin Cancer Res 2008 Jul 1;14(13):4067-78.
[88] Tone AA, Virtanen C, Shaw PA, Brown TJ. Decreased progesterone receptor isoform expression in luteal phase fallopian tube epithelium and high-grade serous carcinoma. Endocr Relat Cancer 2011 Apr;18(2):221-34.
[89] Tung CS, Mok SC, Tsang YT, Zu Z et al. PAX2 expression in low malignant potential ovarian tumors and low-grade ovarian serous carcinomas. Mod Pathol2009 Sep;22(9):1243-50.
[90] Bowen NJ, Walker LD, Matyunina LV, Logani S et al. Gene expression profiling supports the hypothesis that human ovarian surface epithelia are multipotent and capable of serving as ovarian cancer initiating cells. BMC Med Genomics2009 Dec 29;2:71.
[91] Mok SC, Bonome T, Vathipadiekal V, Bell A et al. A gene signature predictive for outcome in advanced ovarian cancer identifies a survival factor: microfibril-associated glycoprotein 2. Cancer Cell 2009 Dec 8;16(6):521-32.
[92] Iorio E, Ricci A, Bagnoli M, Pisanu ME et al. Activation of phosphatidylcholine cycle enzymes in human epithelial ovarian cancer cells. Cancer Res 2010 Mar 1;70(5):2126-35.
[93] Pejovic T, Pande NT, Mori M, Mhawech-Fauceglia P et al. Expression profiling of the ovarian surface kinome reveals candidate genes for early neoplastic changes. Transl Oncol 2009 Dec;2(4):341-9.
[94] Anglesio MS, Arnold JM, George J, Tinker AV et al. Mutation of ERBB2 provides a novel alternative mechanism for the ubiquitous activation of RAS-MAPK in ovarian serous low malignant potential tumors. Mol Cancer Res 2008 Nov;6(11):1678-90.
[95] Konstantinopoulos PA, Spentzos D, Karlan BY, Taniguchi T et al. Gene expression profile of BRCAness that correlates with responsiveness to chemotherapy and with outcome in patients with epithelial ovarian cancer. J Clin Oncol 2010 Aug 1;28(22):3555-61.
[96] Ferriss JS, Kim Y, Duska L, Birrer M et al. Multi-gene expression predictors of single drug responses to adjuvant chemotherapy in ovarian carcinoma: predicting platinum resistance. PLoS One 2012;7(2):e30550.
[97] Badea L, Herlea V, Dima SO, Dumitrascu T et al. Combined gene expression analysis of whole-tissue and microdissected pancreatic ductal adenocarcinoma identifies genes specifically overexpressed in tumor epithelia. Hepatogastroenterology 2008 Nov-Dec;55(88):2016-27.
[98] Idichi T, Seki N, Kurahara H, Yonemori K et al. Regulation of actin-binding protein ANLN by antitumor <i>miR-217</i> inhibits cancer cell aggressiveness in pancreatic ductal adenocarcinoma. Oncotarget 2017 Aug 8;8(32):53180-53193.
[99] Pei H, Li L, Fridley BL, Jenkins GD et al. FKBP51 affects cancer cell response to chemotherapy by negatively regulating Akt. Cancer Cell 2009 Sep 8;16(3):259-66.
[100] Li L, Zhang JW, Jenkins G, Xie F et al. Genetic variations associated with gemcitabine treatment outcome in pancreatic cancer. Pharmacogenet Genomics 2016 Dec;26(12):527-537.
[101] Donahue TR, Tran LM, Hill R, Li Y et al. Integrative survival-based molecular profiling of human pancreatic cancer. Clin Cancer Res 2012 Mar 1;18(5):1352-63.
[102] Yang S, He P, Wang J, Schetter A et al. A Novel MIF Signaling Pathway Drives the Malignant Character of Pancreatic Cancer by Targeting NR3C2. Cancer Res2016 Jul 1;76(13):3838-50.
[103] Moffitt RA, Marayati R, Flate EL, Volmar KE et al. Virtual microdissection identifies distinct tumor- and stroma-specific subtypes of pancreatic ductal adenocarcinoma. Nat Genet 2015 Oct;47(10):1168-78.
[104] Wang Y, Xia XQ, Jia Z, Sawyers A et al. In silico estimates of tissue components in surgical samples based on expression profiling data. Cancer Res2010 Aug 15;70(16):6448-55.
[105] Jia Z, Wang Y, Sawyers A, Yao H et al. Diagnosis of prostate cancer using differentially expressed genes in stroma. Cancer Res 2011 Apr 1;71(7):2476-87.
[106] Arredouani MS, Lu B, Bhasin M, Eljanne M et al. Identification of the transcription factor single-minded homologue 2 as a potential biomarker and immunotherapy target in prostate cancer. Clin Cancer Res 2009 Sep 15;15(18):5794-802.
[107] Varambally S, Yu J, Laxman B, Rhodes DR et al. Integrative genomic and proteomic analysis of prostate cancer reveals signatures of metastatic progression. Cancer Cell 2005 Nov;8(5):393-406.
[108] Planche A, Bacac M, Provero P, Fusco C et al. Identification of prognostic molecular features in the reactive stroma of human breast and prostate cancer. PLoS One 2011;6(5):e18640.
[109] Satake H, Tamura K, Furihata M, Anchi T et al. The ubiquitin-like molecule interferon-stimulated gene 15 is overexpressed in human prostate cancer. Oncol Rep 2010 Jan;23(1):11-6.
[110] Pascal LE, Goo YA, Vêncio RZ, Page LS et al. Gene expression down-regulation in CD90+ prostate tumor-associated stromal cells involves potential organ-specific genes. BMC Cancer 2009 Sep 8;9:317.
[111] Miyazaki FA, Guardia GD, Vêncio RZ, de Farias CR. Semantic integration of gene expression analysis tools and data sources using software connectors. BMC Genomics 2013 Oct 25;14 Suppl 6:S2.
[112] Ross-Adams H, Lamb AD, Dunning MJ, Halim S et al. Integration of copy number and transcriptomics provides risk stratification in prostate cancer: A discovery and validation cohort study. EBioMedicine 2015 Sep;2(9):1133-44.
[113] Ross-Adams H, Lamb AD, Dunning MJ, Halim S et al. Integration of copy number and transcriptomics provides risk stratification in prostate cancer: A discovery and validation cohort study. EBioMedicine 2015 Sep;2(9):1133-44.
[114] Stuart RO, Wachsman W, Berry CC, Wang-Rodriguez J et al. In silico dissection of cell-type-associated patterns of gene expression in prostate cancer. Proc Natl Acad Sci U S A 2004 Jan 13;101(2):615-20.
[115] Chandran UR, Ma C, Dhir R, Bisceglia M et al. Gene expression profiles of prostate cancer reveal involvement of multiple molecular pathways in the metastatic process. BMC Cancer 2007 Apr 12;7:64.
[116] Chiosea S, Jelezcova E, Chandran U, Acquafondata M et al. Up-regulation of dicer, a component of the MicroRNA machinery, in prostate adenocarcinoma. Am J Pathol 2006 Nov;169(5):1812-20.
[117] Chandran UR, Ma C, Dhir R, Bisceglia M et al. Gene expression profiles of prostate cancer reveal involvement of multiple molecular pathways in the metastatic process. BMC Cancer 2007 Apr 12;7:64.
[118] Yu YP, Landsittel D, Jing L, Nelson J et al. Gene expression alterations in prostate cancer predicting tumor aggression and preceding development of malignancy. J Clin Oncol 2004 Jul 15;22(14):2790-9.
[119] Chandran UR, Dhir R, Ma C, Michalopoulos G et al. Differences in gene expression in prostate cancer, normal appearing prostate tissue adjacent to cancer and prostate tissue from cancer free organ donors. BMC Cancer 2005 May 13;5:45.
[120] Chiosea S, Jelezcova E, Chandran U, Acquafondata M et al. Up-regulation of dicer, a component of the MicroRNA machinery, in prostate adenocarcinoma. Am J Pathol 2006 Nov;169(5):1812-20.
[121] Chandran UR, Ma C, Dhir R, Bisceglia M et al. Gene expression profiles of prostate cancer reveal involvement of multiple molecular pathways in the metastatic process. BMC Cancer 2007 Apr 12;7:64.
[122] Yu YP, Landsittel D, Jing L, Nelson J et al. Gene expression alterations in prostate cancer predicting tumor aggression and preceding development of malignancy. J Clin Oncol 2004 Jul 15;22(14):2790-9.
[123] Chandran UR, Dhir R, Ma C, Michalopoulos G et al. Differences in gene expression in prostate cancer, normal appearing prostate tissue adjacent to cancer and prostate tissue from cancer free organ donors. BMC Cancer 2005 May 13;5:45.
[124] Yu YP, Landsittel D, Jing L, Nelson J et al. Gene expression alterations in prostate cancer predicting tumor aggression and preceding development of malignancy. J Clin Oncol 2004 Jul 15;22(14):2790-9.
[125] Wang Y, Xia XQ, Jia Z, Sawyers A et al. In silico estimates of tissue components in surgical samples based on expression profiling data. Cancer Res2010 Aug 15;70(16):6448-55.
[126] Jia Z, Wang Y, Sawyers A, Yao H et al. Diagnosis of prostate cancer using differentially expressed genes in stroma. Cancer Res 2011 Apr 1;71(7):2476-87.
[127] Sun Y, Goodison S. Optimizing molecular signatures for predicting prostate cancer recurrence. Prostate 2009 Jul 1;69(10):1119-27.
[128] Talantov D, Mazumder A, Yu JX, Briggs T et al. Novel genes associated with malignant melanoma but not benign melanocytic lesions. Clin Cancer Res 2005 Oct 15;11(20):7234-42.
[129] Cristescu, R.; Lee, J.; Nebozhyn, M.; Kim, K.M.; Ting, J.C.; Wong, S.S.; Liu, J.; Yue, Y.G.; Wang, J.; Yu, K.; et al.Molecular analysis of gastric cancer identifies subtypes associated with distinct clinical outcomes. Nat. Med.2015, 21, 449–456.
[130] Ooi CH, Ivanova T, Wu J, Lee M et al. Oncogenic pathway combinations predict clinical prognosis in gastric cancer. PLoS Genet 2009 Oct;5(10):e1000676.
[131] Tao J, Deng NT, Ramnarayanan K, Huang B et al. CD44-SLC1A2 gene fusions in gastric cancer. Sci Transl Med 2011 Apr 6;3(77):77ra30.
[132] Muratani M, Deng N, Ooi WF, Lin SJ et al. Nanoscale chromatin profiling of gastric adenocarcinoma reveals cancer-associated cryptic promoters and somatically acquired regulatory elements. Nat Commun 2014 Jul 10;5:4361.
[133] Chia NY, Deng N, Das K, Huang D et al. Regulatory crosstalk between lineage-survival oncogenes KLF5, GATA4 and GATA6 cooperatively promotes gastric cancer development. Gut 2015 May;64(5):707-19.
[134] Lei Z, Tan IB, Das K, Deng N et al. Identification of molecular subtypes of gastric cancer with different responses to PI3-kinase inhibitors and 5-fluorouracil. Gastroenterology 2013 Sep;145(3):554-65.
[135] Subhash VV, Yeo MS, Wang L, Tan SH et al. Anti-tumor efficacy of Selinexor (KPT-330) in gastric cancer is dependent on nuclear accumulation of p53 tumor suppressor. Sci Rep 2018 Aug 16;8(1):12248.
[136] Chia NY, Deng N, Das K, Huang D et al. Regulatory crosstalk between lineage-survival oncogenes KLF5, GATA4 and GATA6 cooperatively promotes gastric cancer development. Gut 2015 May;64(5):707-19.
[137] Lei Z, Tan IB, Das K, Deng N et al. Identification of molecular subtypes of gastric cancer with different responses to PI3-kinase inhibitors and 5-fluorouracil. Gastroenterology 2013 Sep;145(3):554-65.
[138] Subhash VV, Yeo MS, Wang L, Tan SH et al. Anti-tumor efficacy of Selinexor (KPT-330) in gastric cancer is dependent on nuclear accumulation of p53 tumor suppressor. Sci Rep 2018 Aug 16;8(1):12248.
[139] Cristescu R, Lee J, Nebozhyn M, Kim KM et al. Molecular analysis of gastric cancer identifies subtypes associated with distinct clinical outcomes. Nat Med2015 May;21(5):449-56.
[140] Oh SC, Sohn BH, Cheong JH, Kim SB et al. Clinical and genomic landscape of gastric cancer with a mesenchymal phenotype. Nat Commun 2018 May 3;9(1):1777.
[141] D'Errico M, de Rinaldis E, Blasi MF, Viti V et al. Genome-wide expression profile of sporadic gastric cancers with microsatellite instability. Eur J Cancer 2009 Feb;45(3):461-9.
[142] Wu Y, Grabsch H, Ivanova T, Tan IB et al. Comprehensive genomic meta-analysis identifies intra-tumoural stroma as a predictor of survival in patients with gastric cancer. Gut 2013 Aug;62(8):1100-11.
[143] Chia NY, Deng N, Das K, Huang D et al. Regulatory crosstalk between lineage-survival oncogenes KLF5, GATA4 and GATA6 cooperatively promotes gastric cancer development. Gut 2015 May;64(5):707-19.
[144] Lei Z, Tan IB, Das K, Deng N et al. Identification of molecular subtypes of gastric cancer with different responses to PI3-kinase inhibitors and 5-fluorouracil. Gastroenterology 2013 Sep;145(3):554-65.
[145] Wang Q, Wen YG, Li DP, Xia J et al. Upregulated INHBA expression is associated with poor survival in gastric cancer. Med Oncol 2012 Mar;29(1):77-83.
[146] Wu Y, Grabsch H, Ivanova T, Tan IB et al. Comprehensive genomic meta-analysis identifies intra-tumoural stroma as a predictor of survival in patients with gastric cancer. Gut 2013 Aug;62(8):1100-11.
[147] Chia NY, Deng N, Das K, Huang D et al. Regulatory crosstalk between lineage-survival oncogenes KLF5, GATA4 and GATA6 cooperatively promotes gastric cancer development. Gut 2015 May;64(5):707-19.
[148] Lei Z, Tan IB, Das K, Deng N et al. Identification of molecular subtypes of gastric cancer with different responses to PI3-kinase inhibitors and 5-fluorouracil. Gastroenterology 2013 Sep;145(3):554-65.
[149] Day RS, McDade KK, Chandran UR, Lisovich A et al. Identifier mapping performance for integrating transcriptomics and proteomics experimental results. BMC Bioinformatics 2011 May 27;12:213.
[150] Richardson AL, Wang ZC, De Nicolo A, Lu X et al. X chromosomal abnormalities in basal-like human breast cancer. Cancer Cell 2006 Feb;9(2):121-32.
[151] Alimonti A, Carracedo A, Clohessy JG, Trotman LC et al. Subtle variations in Pten dose determine cancer susceptibility. Nat Genet 2010 May;42(5):454-8.
[152] Li Y, Zou L, Li Q, Haibe-Kains B et al. Amplification of LAPTM4B and YWHAZ contributes to chemotherapy resistance and recurrence of breast cancer. Nat Med 2010 Feb;16(2):214-8.
[153] Sabatier R, Finetti P, Cervera N, Lambaudie E et al. A gene expression signature identifies two prognostic subgroups of basal breast cancer. Breast Cancer Res Treat 2011 Apr;126(2):407-20.
[154] Sabatier R, Finetti P, Adelaide J, Guille A et al. Down-regulation of ECRG4, a candidate tumor suppressor gene, in human breast cancer. PLoS One2011;6(11):e27656.
[155] Bos PD, Zhang XH, Nadal C, Shu W et al. Genes that mediate breast cancer metastasis to the brain. Nature 2009 Jun 18;459(7249):1005-9.
[156] de Cremoux P, Valet F, Gentien D, Lehmann-Che J et al. Importance of pre-analytical steps for transcriptome and RT-qPCR analyses in the context of the phase II randomised multicentre trial REMAGUS02 of neoadjuvant chemotherapy in breast cancer patients. BMC Cancer 2011 Jun 1;11:215.
[157] Loi S, Haibe-Kains B, Desmedt C, Wirapati P et al. Predicting prognosis using molecular profiling in estrogen receptor-positive breast cancer treated with tamoxifen. BMC Genomics 2008 May 22;9:239.
[158] Loi S, Haibe-Kains B, Majjaj S, Lallemand F et al. PIK3CA mutations associated with gene signature of low mTORC1 signaling and better outcomes in estrogen receptor-positive breast cancer. Proc Natl Acad Sci U S A 2010 Jun 1;107(22):10208-13.
[159] Smeets A, Daemen A, Vanden Bempt I, Gevaert O et al. Prediction of lymph node involvement in breast cancer from primary tumor tissue using gene expression profiling and miRNAs. Breast Cancer Res Treat 2011 Oct;129(3):767-76.
[160] Barry WT, Kernagis DN, Dressman HK, Griffis RJ et al. Intratumor heterogeneity and precision of microarray-based predictors of breast cancer biology and clinical outcome. J Clin Oncol 2010 May 1;28(13):2198-206.
[161] Desmedt C, Di Leo A, de Azambuja E, Larsimont D et al. Multifactorial approach to predicting resistance to anthracyclines. J Clin Oncol 2011 Apr 20;29(12):1578-86.
[162] Li Y, Zou L, Li Q, Haibe-Kains B et al. Amplification of LAPTM4B and YWHAZ contributes to chemotherapy resistance and recurrence of breast cancer. Nat Med 2010 Feb;16(2):214-8.
[163] Juul N, Szallasi Z, Eklund AC, Li Q et al. Assessment of an RNA interference screen-derived mitotic and ceramide pathway metagene as a predictor of response to neoadjuvant paclitaxel for primary triple-negative breast cancer: a retrospective analysis of five clinical trials. Lancet Oncol 2010 Apr;11(4):358-65.
[164] Haibe-Kains B, Desmedt C, Di Leo A, Azambuja E et al. Genome-wide gene expression profiling to predict resistance to anthracyclines in breast cancer patients. Genom Data 2013 Dec;1:7-10.
[165] Kao KJ, Chang KM, Hsu HC, Huang AT. Correlation of microarray-based breast cancer molecular subtypes and clinical outcomes: implications for treatment optimization. BMC Cancer 2011 Apr 18;11:143.
[166] Dedeurwaerder S, Desmedt C, Calonne E, Singhal SK et al. DNA methylation profiling reveals a predominant immune component in breast cancers. EMBO Mol Med 2011 Dec;3(12):726-41.
[167] Richardson AL, Wang ZC, De Nicolo A, Lu X et al. X chromosomal abnormalities in basal-like human breast cancer. Cancer Cell 2006 Feb;9(2):121-32.
[168] Silver DP, Richardson AL, Eklund AC, Wang ZC et al. Efficacy of neoadjuvant Cisplatin in triple-negative breast cancer. J Clin Oncol 2010 Mar 1;28(7):1145-53.
[169] Li Y, Zou L, Li Q, Haibe-Kains B et al. Amplification of LAPTM4B and YWHAZ contributes to chemotherapy resistance and recurrence of breast cancer. Nat Med 2010 Feb;16(2):214-8.
[170] Juul N, Szallasi Z, Eklund AC, Li Q et al. Assessment of an RNA interference screen-derived mitotic and ceramide pathway metagene as a predictor of response to neoadjuvant paclitaxel for primary triple-negative breast cancer: a retrospective analysis of five clinical trials. Lancet Oncol 2010 Apr;11(4):358-65.
[171] Clarke C, Madden SF, Doolan P, Aherne ST et al. Correlating transcriptional networks to breast cancer survival: a large-scale coexpression analysis. Carcinogenesis 2013 Oct;34(10):2300-8.
[172] Lisowska KM, Dudaladava V, Jarzab M, Huzarski T et al. BRCA1-related gene signature in breast cancer: the role of ER status and molecular type. Front Biosci (Elite Ed) 2011 Jan 1;3:125-36.
[173] Lehmann BD, Bauer JA, Chen X, Sanders ME et al. Identification of human triple-negative breast cancer subtypes and preclinical models for selection of targeted therapies. J Clin Invest 2011 Jul;121(7):2750-67.
[174] Turashvili G, Bouchal J, Baumforth K, Wei W et al. Novel markers for differentiation of lobular and ductal invasive breast carcinomas by laser microdissection and microarray analysis. BMC Cancer 2007 Mar 27;7:55.
[175] Chen DT, Nasir A, Culhane A, Venkataramu C et al. Proliferative genes dominate malignancy-risk gene signature in histologically-normal breast tissue. Breast Cancer Res Treat 2010 Jan;119(2):335-46.
[176] Bauer JA, Chakravarthy AB, Rosenbluth JM, Mi D et al. Identification of markers of taxane sensitivity using proteomic and genomic analyses of breast tumors from patients receiving neoadjuvant paclitaxel and radiation. Clin Cancer Res 2010 Jan 15;16(2):681-90.
[177] Lehmann BD, Bauer JA, Chen X, Sanders ME et al. Identification of human triple-negative breast cancer subtypes and preclinical models for selection of targeted therapies. J Clin Invest 2011 Jul;121(7):2750-67.
[178] Adams S, Chakravarthy AB, Donach M, Spicer D et al. Preoperative concurrent paclitaxel-radiation in locally advanced breast cancer: pathologic response correlates with five-year overall survival. Breast Cancer Res Treat 2010 Dec;124(3):723-32.
[179] Lehmann BD, Bauer JA, Chen X, Sanders ME et al. Identification of human triple-negative breast cancer subtypes and preclinical models for selection of targeted therapies. J Clin Invest 2011 Jul;121(7):2750-67.
[180] Hugo W, Zaretsky JM, Sun L, Song C, Moreno BH, Hu-Lieskovan S, et al. Genomic and Transcriptomic Features of Response to Anti-PD-1 Therapy in Metastatic Melanoma. Cell 2016;165(1):35-44
[181] Diana Miao. et al.Genomic correlates of response to immune checkpoint therapies in clear cell renal cell carcinoma.Science. 2018 Feb 16; 359(6377): 801–806.
[182] Ma XJ, Wang Z, Ryan PD, Isakoff SJ et al. A two-gene expression ratio predicts clinical outcome in breast cancer patients treated with tamoxifen. Cancer Cell 2004 Jun;5(6):607-16.
[183] Huang AC, Orlowski RJ, Xu X, Mick R et al. A single dose of neoadjuvant PD-1 blockade predicts clinical outcomes in resectable melanoma. Nat Med 2019 Mar;25(3):454-461.
[184] Gao Y, Weenink B, van den Bent MJ, Erdem-Eraslan L et al. Expression-based intrinsic glioma subtypes are prognostic in low-grade gliomas of the EORTC22033-26033 clinical trial. Eur J Cancer 2018 May;94:168-178.
[185] Kim KT, Lee HW, Lee HO, Kim SC et al. Single-cell mRNA sequencing identifies subclonal heterogeneity in anti-cancer drug responses of lung adenocarcinoma cells. Genome Biol 2015 Jun 19;16:127.
[186] Chen W, Li Y, Easton J, Finkelstein D et al. UMI-count modeling and differential expression analysis for single-cell RNA sequencing. Genome Biol 2018 May 31;19(1):70.
[187] Cheng C, Easton J, Rosencrance C, Li Y et al. Latent cellular analysis robustly reveals subtle diversity in large-scale single-cell RNA-seq data. Nucleic Acids Res 2019 Dec 16;47(22):e143.
[188] Patel AP, Tirosh I, Trombetta JJ, et al. Single-cell RNA-seq highlights intratumoral heterogeneity in primary glioblastoma. Science (New York, NY) 2014; 344(6190): 1396-401.

## Sheet: Data 9
Supplementary Data 9. The marker genes of immune signatures, proliferation, and tumor stemness
B cells	CD4+ regulatory T cells	CD8+ T cells	HLA	IFN	TILs	Proliferation	Stemness
BACH2	CTLA4	CD2	HLA-E	DDX4	ITM2C	CCNB1	DNMT3B
BANK1	FOXP3	CD247	HLA-DPB2	IFIT1	CD38	CDC20	PFAS
BLK	GPR15	CD28	HLA-C	IFIT2	C1orf38	CDKN3	XRCC5
BTLA	IL32	CD3D	HLA-J	IFIT3	GLYR1	CDK1	HAUS6
CD79A	IL4	CD3E	HLA-DQB1	IRF7	ICOS	MAD2L1	TET1
CD79B	IL5	CD3G	HLA-DQB2	ISG20	F5	PRC1	IGF2BP1
FCRL1		CD8A	HLA-DQA2	MX1	TIGIT	RRM2	PLAA
FCRL3		ICAM1	HLA-DQA1	MX2	KLRD1		TEX10
HVCN1		ITGAL	HLA-A	RSAD2	IRF4		MSH6
RALGPS2		ITGB2	HLA-DMA	TNFSF10	PRKCQ		DLGAP5
		PTPRC	HLA-DOB	GPR146	FCRL5		SKIV2L2
		THY1	HLA-DRB1	SELP	SIRPG		SOHLH2
			HLA-H	AHR	LPXN		RRAS2
			HLA-B		IL2RG		PAICS
			HLA-DRB5		CCL5		CPSF3
			HLA-DOA		LCK		LIN28B
			HLA-DPB1		TRAF3IP3		IPO5
			HLA-DRA		CD86		BMPR1A
			HLA-DRB6		MAL		ZNF788
			HLA-L		LILRB1		ASCC3
			HLA-F		DOK2		FANCB
			HLA-G		CD6		HMGA2
			HLA-DMB		PAG1		TRIM24
			HLA-DPA1		LAX1		ORC1
					PLEK		HDAC2
					PIK3CD		HESX1
					SLAMF1		INHBE
					XCL1		MIS18A
					GPR171		DCUN1D5
					XCL2		MRPL3
					TBX21		CENPH
					CD2		MYCN
					CD53		HAUS1
					KLHL6		GDF3
					SLAMF6		TBCE
					CD40		RIOK2
					SIT1		BCKDHB
					TNFRSF4		RAD1
					CD79A		NREP
					CD247		ADH5
					LCP2		PLRG1
					CD3D		ROR1
					CD27		RAB3B
					SH2D1A		DIAPH3
					FYB		GNL2
					ARHGAP30		FGF2
					ACAP1		NMNAT2
					CST7		KIF20A
					CD3G		CENPI
					IL2RB		DDX1
					CD3E		XXYLT1
					FCRL3		GPR176
					CORO1A		BBS9
					ITK		C14orf166
					TCL1A		BOD1
					CYBB		CDC123
					CSF2RB		SNRPD3
					IKZF1		FAM118B
					NCF4		DPH3
					DOCK2		EIF2B3
					CCR2		RPF2
					PTPRC		APLP1
					PLAC8		DACT1
					NCKAP1L		PDHB
					IL7R		C14orf119
					SEPT6		DTD1
					CD28		SAMM50
					STAT4		CCL26
					CD8A		MED20
					LY9		UTP6
					CD48		RARS2
					HCST		ARMCX2
					PTPRCAP		RARS
					SASH3		MTHFD2
					ARHGAP25		DHX15
					LAT		HTR7
					TRAT1		MTHFD1L
					IL10RA		ARMC9
					PAX5		XPOT
					CCR7		IARS
					DOCK11		HDX
					PARVG		ACTRT3
					SPNS1		ERCC2
					CD52		TBC1D16
					HCLS1		GARS
					ARHGAP9		KIF7
					GIMAP6		UBE2K
					PRKCB		SLC25A3
					MS4A1		ICMT
					GPR18		UGGT2
					TBC1D10C		ATP11C
					GVIN1		SLC24A1
					P2RY8		EIF2AK4
					EVI2B		GPX8
					VAMP5		ALX1
					KLRK1		OSTC
					SELL		TRPC4
					MPEG1		HAS2
					MS4A6A		FZD2
					ARHGAP15		TRNT1
					MFNG		MMADHC
					GZMK		SNX8
					SELPLG		CDH6
					TARP		HAT1
					GIMAP7		SEC11A
					FAM65B		DIMT1
					INPP5D		TM2D2
					ITGA4		FST
					MGC29506		GBE1
					GPSM3
					STK10
					CLEC2D
					IL16
					NLRC3
					GIMAP5
					GIMAP4
					IFFO1
					CFH
					PVRIG
					CFHR1
